# Supplementary material
Source: publisher figshare collection journal article supplement (https://rs.figshare.com/ndownloader/files/26311208)
Supplement: Supplementary file 1 [file 26311208]

## Sheet: Sheet1
SYMBOL	0 min	30 min (NC)	30 min (HC)	30 min (FC)	90 min (NC)	90 min (HC)	90 min (FC)	180 min (NC)	180 min (HC)	180 min (FC)	DEFINITION
Il10	66.6	110.6	106.2	-1.04143	377.9	919.1	2.43212	3452.1	645.4	-5.34878	Mus musculus interleukin 10 (Il10), mRNA.
Il33	80.2	75	79.6	1.06133	167.3	230.3	1.37657	1377.3	321	-4.29065	Mus musculus interleukin 33 (Il33), mRNA.
Batf2	234.2	245.7	257.9	1.04965	297.8	311.4	1.04567	1875	462.6	-4.05318	Mus musculus basic leucine zipper transcription factor, ATF-like 2 (Batf2), mRNA.
Gp38	96.1	102.2	102.6	1.00391	260.2	401.3	1.54228	1458.3	390.4	-3.7354
Serpinb2	63	71.8	80.5	1.12117	208.5	249.4	1.19616	921.5	253.3	-3.63798	Mus musculus serine (or cysteine) peptidase inhibitor, clade B, member 2 (Serpinb2), mRNA.
9930111J21Rik	188.7	188.2	193.7	1.02922	186.5	238.9	1.28097	575.1	167.7	-3.42934	Mus musculus RIKEN cDNA 9930111J21 gene (9930111J21Rik), mRNA.
Serpina3f	65.9	79.6	68.9	-1.1553	83.7	107.2	1.28076	291.4	89.3	-3.26316	Mus musculus serine (or cysteine) peptidase inhibitor, clade A, member 3F (Serpina3f), mRNA.
AA467197	69.5	73.2	65.5	-1.11756	89.8	99.3	1.10579	724.2	224.6	-3.2244	Mus musculus expressed sequence AA467197 (AA467197), mRNA.
Cd207	82.4	85.1	86.2	1.01293	110.9	232.7	2.09829	364.3	113.7	-3.20405	Mus musculus CD207 antigen (Cd207), mRNA.
Timp1	72.4	68.9	71.7	1.04064	231	414.9	1.7961	1840.5	575.8	-3.19642
Fcgr1	1006.3	957.1	919.6	-1.04078	388.3	430.7	1.10919	1756.8	570	-3.08211	Mus musculus Fc receptor, IgG, high affinity I (Fcgr1), mRNA.
Gbp1	320.7	336.4	338	1.00476	634.6	790.3	1.24535	4024.6	1310.8	-3.07034	Mus musculus guanylate binding protein 1 (Gbp1), mRNA.
Gbp2	138.6	155.6	163.9	1.05334	242.7	258.3	1.06428	1314.3	432.9	-3.03604	Mus musculus guanylate binding protein 2 (Gbp2), mRNA.
Mx1	213	207.3	219.9	1.06078	179.1	253.8	1.41709	975.2	324.9	-3.00154	Mus musculus myxovirus (influenza virus) resistance 1 (Mx1), mRNA.
Upp1	113.7	119.3	122.2	1.02431	153.5	192	1.25081	848.4	294.7	-2.87886	Mus musculus uridine phosphorylase 1 (Upp1), mRNA.
Slfn1	129	130.9	128.1	-1.02186	119.7	122.5	1.02339	819.2	285.4	-2.87036	Mus musculus schlafen 1 (Slfn1), mRNA.
1190003J15Rik	73.5	80.4	82.2	1.02239	92.1	83.8	-1.09905	385.9	134.6	-2.86701	Mus musculus RIKEN cDNA 1190003J15 gene (1190003J15Rik), mRNA. XM_133915 XM_900078 XM_900080 XM_900083 XM_917938 XM_925372 XM_925374 XM_925375
Adap2	75.2	71.3	71.3	1	81.7	88.2	1.07956	289.4	103.1	-2.80698	Mus musculus ArfGAP with dual PH domains 2 (Adap2), mRNA.
Ggta1	336	373.5	388	1.03882	268.9	287.5	1.06917	868.1	310.4	-2.79671	Mus musculus glycoprotein galactosyltransferase alpha 1, 3 (Ggta1), mRNA.
Notch1	86.4	83.8	79.2	-1.05808	71.4	82.8	1.15966	330.5	118.2	-2.79611	Mus musculus Notch gene homolog 1 (Drosophila) (Notch1), mRNA.
Sertad3	318.5	194.4	202.3	1.04064	149	112.1	-1.32917	589.1	214.4	-2.74767	Mus musculus SERTA domain containing 3 (Sertad3), mRNA.
Nos2	79.8	82.7	82.6	-1.00121	98.5	77.5	-1.27097	416.8	152.8	-2.72775	Mus musculus nitric oxide synthase 2, inducible (Nos2), mRNA.
Adora3	78.5	82.9	78.4	-1.0574	77	70.6	-1.09065	271.3	100.2	-2.70758	Mus musculus adenosine A3 receptor (Adora3), transcript variant 1, mRNA.
Fcgr4	792.1	776	827.3	1.06611	743.7	753.4	1.01304	3691.1	1364.3	-2.70549	Mus musculus Fc receptor, IgG, low affinity IV (Fcgr4), mRNA.
Id1	94.3	106.6	108.6	1.01876	177.1	180.7	1.02033	812.4	301.9	-2.69096	Mus musculus inhibitor of DNA binding 1 (Id1), mRNA.
Il1rn	157.8	233.6	227.8	-1.02546	636.5	1061.2	1.66724	2510.8	938.8	-2.67448	Mus musculus interleukin 1 receptor antagonist (Il1rn), transcript variant 1, mRNA.
Gbp5	88.8	84.4	81.6	-1.03431	145.5	101.9	-1.42787	1167.5	439.1	-2.65885	Mus musculus guanylate binding protein 5 (Gbp5), mRNA.
Iigp2	2671.3	2183.8	2338.6	1.07089	1625.4	2574.8	1.5841	6001.8	2318.7	-2.58843	Mus musculus interferon inducible GTPase 2 (Iigp2), mRNA.
Rin2	797.4	764.8	741	-1.03212	321	311	-1.03215	1226.2	477.3	-2.56903	Mus musculus Ras and Rab interactor 2 (Rin2), mRNA.
LOC100048556	82.1	91.6	95.3	1.04039	149.5	176.4	1.17993	532.2	209.7	-2.53791	PREDICTED: Mus musculus similar to monocyte chemoattractant protein-5, transcript variant 1 (LOC100048556), mRNA.
Cd274	293.2	351.2	326.9	-1.07433	341.2	381.7	1.1187	2181.4	860.1	-2.53622	Mus musculus CD274 antigen (Cd274), mRNA.
LOC667370	1097.6	1275.6	1226.2	-1.04029	1458.3	1650.6	1.13187	6045.6	2388.7	-2.53092	PREDICTED: Mus musculus similar to interferon-induced protein with tetratricopeptide repeats 3 (LOC667370), mRNA.
Igtp	2234.3	2310.7	2248.2	-1.0278	1832.5	2257.6	1.23198	5297	2137.6	-2.47801	Mus musculus interferon gamma induced GTPase (Igtp), mRNA.
Saa3	121.2	143	149.2	1.04336	271.9	248.1	-1.09593	1245	508.2	-2.44982	Mus musculus serum amyloid A 3 (Saa3), mRNA.
Cd86	101.7	106.5	105.7	-1.00757	131.3	158.5	1.20716	435.8	178.4	-2.44283	Mus musculus CD86 antigen (Cd86), mRNA.
Samsn1	693	784.2	786.4	1.00281	803.3	726.9	-1.1051	2198.2	910.1	-2.41534	Mus musculus SAM domain, SH3 domain and nuclear localization signals, 1 (Samsn1), mRNA.
Gja1	653.5	757.8	680.6	-1.11343	1023.1	984.7	-1.039	2567.1	1078.1	-2.38113	Mus musculus gap junction membrane channel protein alpha 1 (Gja1), mRNA.
Hhex	1308.7	1041.1	1048.5	1.00711	333.2	487.5	1.46309	1505	635.7	-2.36747	Mus musculus hematopoietically expressed homeobox (Hhex), mRNA.
A430084P05Rik	261.8	308.4	319.4	1.03567	290	357.4	1.23241	1194.6	510.9	-2.33823	Mus musculus RIKEN cDNA A430084P05 gene (A430084P05Rik), mRNA.
Cfb	163.1	169	168.9	-1.00059	164.6	171.5	1.04192	668.8	286.1	-2.33764	Mus musculus complement factor B (Cfb), mRNA.
BC013712	455.5	456.7	496.4	1.08693	236.1	200	-1.1805	1057.9	453.9	-2.33069	Mus musculus cDNA sequence BC013712 (BC013712), mRNA.
Slc25a28	1538.8	1387.9	1453.7	1.04741	717.5	613	-1.17047	2086.2	901.4	-2.3144	Mus musculus solute carrier family 25, member 28 (Slc25a28), mRNA.
Aff1	187.8	172.2	190.1	1.10395	211.4	292.3	1.38269	493.6	214.2	-2.30439	Mus musculus AF4/FMR2 family, member 1 (Aff1), transcript variant 1, mRNA.
Daxx	1874.6	2103.6	2169.8	1.03147	1637.4	2292.3	1.39996	4705.5	2054.5	-2.29034	Mus musculus Fas death domain-associated protein (Daxx), mRNA.
Spsb1	85.4	91.8	86.4	-1.0625	91.7	108	1.17775	356	156	-2.28205	Mus musculus splA/ryanodine receptor domain and SOCS box containing 1 (Spsb1), mRNA.
Chac1	2882.8	1821.6	1754.5	-1.03824	397.7	390.7	-1.01792	996.4	436.7	-2.28166	Mus musculus ChaC, cation transport regulator-like 1 (E. coli) (Chac1), mRNA.
Carhsp1	596.2	661.2	660.2	-1.00151	694.5	950.8	1.36904	1578.6	693.2	-2.27726	Mus musculus calcium regulated heat stable protein 1 (Carhsp1), mRNA.
Gpr146	180.4	161.9	163	1.00679	83.9	85.6	1.02026	227.5	100.5	-2.26368	Mus musculus G protein-coupled receptor 146 (Gpr146), transcript variant 2, mRNA.
Gbp3	495.6	608.8	588.9	-1.03379	1045.2	1110.3	1.06228	3893.8	1722.2	-2.26095	Mus musculus guanylate nucleotide binding protein 3 (Gbp3), mRNA.
Ifi47	2808.6	2644.6	2675	1.0115	2423.4	2728.3	1.12581	6065.6	2691	-2.25403	Mus musculus interferon gamma inducible protein 47 (Ifi47), mRNA.
LOC381483	66.7	79.4	72.2	-1.09972	82	184.3	2.24756	201.9	90	-2.24333	Mus musculus hypothetical LOC381483 (LOC381483), mRNA.
Irf1	1086.3	2187.5	2216	1.01303	587.6	944	1.60654	2290.7	1023.7	-2.23767	Mus musculus interferon regulatory factor 1 (Irf1), mRNA.
4933426M11Rik	631.5	646.1	698.8	1.08157	504.2	482.5	-1.04497	1251.3	561.6	-2.2281	Mus musculus RIKEN cDNA 4933426M11 gene (4933426M11Rik), mRNA.
Fam116b	146.7	130.6	138.4	1.05972	144.3	142.4	-1.01334	451.1	203.6	-2.21562	Mus musculus family with sequence similarity 116, member B (Fam116b), mRNA.
LOC100045950	291.2	333.7	290.9	-1.14713	447.4	491.8	1.09924	1801	814.3	-2.21172	PREDICTED: Mus musculus similar to ets variant gene 3 (LOC100045950), mRNA.
Tiam1	374.5	366	371.1	1.01393	311.1	377.7	1.21408	862.1	390.2	-2.20938	Mus musculus T-cell lymphoma invasion and metastasis 1 (Tiam1), mRNA.
Tnc	73.1	71.7	75.9	1.05858	75.8	78.1	1.03034	265.5	120.2	-2.20882
A630077B13Rik	130.8	137.5	135.9	-1.01177	127.6	117.8	-1.08319	312.2	141.4	-2.20792	Mus musculus RIKEN cDNA A630077B13 gene (A630077B13Rik), mRNA.
Gbp6	122.9	112.6	115.5	1.02575	122.8	132.9	1.08225	340.9	154.6	-2.20505	Mus musculus guanylate binding protein 6 (Gbp6), mRNA.
B4galt3	473.8	490.6	489.5	-1.00225	412.4	362.9	-1.1364	1008.1	458.2	-2.20013	Mus musculus UDP-Gal:betaGlcNAc beta 1,4-galactosyltransferase, polypeptide 3 (B4galt3), mRNA.
Ikzf1	148.3	148.1	136	-1.08897	98.8	105.1	1.06377	302.6	137.6	-2.19913	Mus musculus IKAROS family zinc finger 1 (Ikzf1), transcript variant 1, mRNA.
Tnfaip8l2	787.6	652.1	728.7	1.11747	345	351.3	1.01826	855.6	390.5	-2.19104	Mus musculus tumor necrosis factor, alpha-induced protein 8-like 2 (Tnfaip8l2), mRNA.
AI451617	90.8	95.3	94.6	-1.0074	97.1	118.1	1.21627	252.9	115.8	-2.18394	Mus musculus expressed sequence AI451617 (AI451617), mRNA.
Cd80	83.5	80.6	79.1	-1.01896	131	127.7	-1.02584	394.7	181.1	-2.17946	Mus musculus CD80 antigen (Cd80), mRNA.
Ifit3	3344.1	3558.1	3616.9	1.01653	3963.8	3966.5	1.00068	12747.1	5853.5	-2.17769	Mus musculus interferon-induced protein with tetratricopeptide repeats 3 (Ifit3), mRNA.
LOC625360	120.9	121.4	111.6	-1.08781	90.1	84.6	-1.06501	173.5	80.2	-2.16334	Mus musculus similar to 2-cell-stage, variable group, member 3 (LOC625360), mRNA.
EG432555	159.7	172.5	178.3	1.03362	116.3	131.2	1.12812	319.9	148.4	-2.15566	Mus musculus predicted gene, EG432555 (EG432555), mRNA.
Nod1	118.7	122.4	120.1	-1.01915	93.5	96.8	1.03529	246.5	114.5	-2.15284	Mus musculus nucleotide-binding oligomerization domain containing 1 (Nod1), mRNA.
Csprs	2379.5	2066.9	2028.3	-1.01903	1207	1555.5	1.28873	3025.3	1405.9	-2.15186	Mus musculus component of Sp100-rs (Csprs), mRNA.
Tnfrsf1b	76.4	74.3	74.8	1.00673	99.8	116.4	1.16633	319.4	148.7	-2.14795
Tbc1d13	435.8	409.2	404.2	-1.01237	294.9	315.7	1.07053	728.1	341.6	-2.13144	Mus musculus TBC1 domain family, member 13 (Tbc1d13), mRNA.
Marcks	105.3	106.3	106.2	-1.00094	175.3	179.1	1.02168	1278.8	600	-2.13133	Mus musculus myristoylated alanine rich protein kinase C substrate (Marcks), mRNA.
Cxcl9	80.8	83.1	84.8	1.02046	79	88.3	1.11772	194.9	91.8	-2.12309	Mus musculus chemokine (C-X-C motif) ligand 9 (Cxcl9), mRNA.
1110018G07Rik	1096.7	1116.7	1130.6	1.01245	766.9	895.3	1.16743	1857.9	880.6	-2.10981	Mus musculus RIKEN cDNA 1110018G07 gene (1110018G07Rik), mRNA.
Bst2	2332.1	2234.3	2564.7	1.14788	2988.8	2927.5	-1.02094	5688.9	2696.6	-2.10966	Mus musculus bone marrow stromal cell antigen 2 (Bst2), mRNA.
Flrt3	69.3	64.7	70.2	1.08501	395.9	612.2	1.54635	662.5	314.3	-2.10786	Mus musculus fibronectin leucine rich transmembrane protein 3 (Flrt3), mRNA.
Zfp710	1653.6	1597.8	1747.5	1.09369	463.8	472.5	1.01876	1141.3	546.4	-2.08876	Mus musculus zinc finger protein 710 (Zfp710), mRNA.
Gpc1	93.5	93.9	90.7	-1.03528	91.3	105	1.15005	243.4	116.7	-2.08569	Mus musculus glypican 1 (Gpc1), mRNA.
Stat3	444.4	448.9	459.5	1.02361	476.6	486.2	1.02014	976.4	468.9	-2.08232	Mus musculus signal transducer and activator of transcription 3 (Stat3), transcript variant 1, mRNA.
Tor3a	559.5	582.1	616.2	1.05858	543.5	791.5	1.4563	1324.2	644.7	-2.05398
Axl	311.5	346	337.2	-1.0261	448.3	524	1.16886	1530.2	745.2	-2.05341	Mus musculus AXL receptor tyrosine kinase (Axl), mRNA.
Mxd1	68.3	69.6	69.1	-1.00724	63.9	66.2	1.03599	166.5	81.4	-2.04545	Mus musculus MAX dimerization protein 1 (Mxd1), mRNA.
Ppm1k	421.1	358.6	375.8	1.04796	209.7	189.1	-1.10894	715.5	350.8	-2.03962	Mus musculus protein phosphatase 1K (PP2C domain containing) (Ppm1k), mRNA.
AI451557	304.5	306.3	288.6	-1.06133	281.6	344.2	1.2223	589.3	289.9	-2.03277	Mus musculus expressed sequence AI451557 (AI451557), mRNA.
Vegfc	152.2	158.5	143.2	-1.10684	204.3	224.9	1.10083	680.5	335.4	-2.02892	Mus musculus vascular endothelial growth factor C (Vegfc), mRNA.
Mcoln2	141.5	137.6	143.3	1.04142	147.1	220.3	1.49762	432.3	213.2	-2.02767	Mus musculus mucolipin 2 (Mcoln2), transcript variant 2, mRNA.
Nt5c3	1383.9	1388.8	1380	-1.00638	1468.2	1737.1	1.18315	3873.3	1916.2	-2.02134	Mus musculus 5'-nucleotidase, cytosolic III (Nt5c3), mRNA.
Usp21	219.6	206.1	218.9	1.06211	153.6	126.5	-1.21423	393.9	195.2	-2.01793	Mus musculus ubiquitin specific peptidase 21 (Usp21), mRNA.
BC037034	777.2	628.3	678.1	1.07926	522.2	481.7	-1.08408	1375.4	682.1	-2.01642	Mus musculus cDNA sequence BC037034 (BC037034), mRNA.
Plcl2	285.7	260.6	249.3	-1.04533	157	158.2	1.00764	295.6	147.7	-2.00135	Mus musculus phospholipase C-like 2 (Plcl2), mRNA.
Sp140	200.6	222.2	235.6	1.06031	340.6	315.9	-1.07819	1160.7	584.6	-1.98546	Mus musculus Sp140 nuclear body protein (Sp140), mRNA.
Mx2	1011.8	1254	1240.6	-1.0108	919.1	1080.2	1.17528	2820.5	1429.5	-1.97307
Mustn1	76.3	93.2	87.3	-1.06758	115.6	187.6	1.62284	249	126.2	-1.97306	Mus musculus musculoskeletal, embryonic nuclear protein 1 (Mustn1), mRNA.
Taar3	250	256.8	246	-1.0439	282	352.9	1.25142	588.8	299.2	-1.96791	Mus musculus trace amine-associated receptor 3 (Taar3), mRNA.
1190002H23Rik	483.8	512	525.4	1.02617	831.5	1389.9	1.67156	1841.3	935.9	-1.96741	Mus musculus RIKEN cDNA 1190002H23 gene (1190002H23Rik), mRNA.
Bid	563.9	471.8	455.6	-1.03556	246.7	276.3	1.11998	638.1	324.8	-1.96459	Mus musculus BH3 interacting domain death agonist (Bid), mRNA.
Nrap	441	536.7	510.7	-1.05091	479.7	758.6	1.58141	1085	552.3	-1.96451	Mus musculus nebulin-related anchoring protein (Nrap), transcript variant 1, mRNA.
Aig1	277.9	308.5	284.4	-1.08474	412.4	465.9	1.12973	1007.7	515.2	-1.95594	Mus musculus androgen-induced 1 (Aig1), mRNA.
Slc7a8	149.7	152.6	152	-1.00395	194.1	247.8	1.27666	415	212.2	-1.9557	Mus musculus solute carrier family 7 (cationic amino acid transporter, y+ system), member 8 (Slc7a8), mRNA.
Oas1a	448.3	457.1	433.9	-1.05347	334.7	429.9	1.28443	732.1	375.4	-1.95019	Mus musculus 2'-5' oligoadenylate synthetase 1A (Oas1a), mRNA.
Max	277.8	218.7	290.1	1.32647	248.2	279.7	1.12691	542.8	278.9	-1.94622	Mus musculus Max protein (Max), mRNA.
BC094916	129.3	134.2	140.2	1.04471	144.2	159.2	1.10402	410.5	211.8	-1.93815	Mus musculus cDNA sequence BC094916 (BC094916), mRNA.
Pml	1019.3	965.2	996.5	1.03243	804.5	985.7	1.22523	1554	801.9	-1.9379	Mus musculus promyelocytic leukemia (Pml), transcript variant 2, mRNA.
Fpr2	72.6	69.3	68.1	-1.01762	81.7	89.7	1.09792	332.7	172.2	-1.93206	Mus musculus formyl peptide receptor 2 (Fpr2), mRNA.
LOC100047707	1075.3	1056.7	1077.4	1.01959	891.5	1089.5	1.2221	1802.4	939.1	-1.91928	PREDICTED: Mus musculus hypothetical protein LOC100047707 (LOC100047707), mRNA.
Tha1	118.7	99.6	97.4	-1.02259	89	98.8	1.11011	276.7	145	-1.90828	Mus musculus threonine aldolase 1 (Tha1), mRNA.
Pou2f2	81.2	79.3	82.6	1.04161	88.4	86.7	-1.01961	220.7	115.7	-1.90752	Mus musculus POU domain, class 2, transcription factor 2 (Pou2f2), mRNA.
Trim56	143	123.1	114.1	-1.07888	116.6	130.7	1.12093	220.7	115.8	-1.90587	Mus musculus tripartite motif-containing 56 (Trim56), mRNA.
Cd69	126.4	293.9	271.2	-1.0837	227.8	202.4	-1.12549	988.9	519.3	-1.90429	Mus musculus CD69 antigen (Cd69), mRNA. XM_925572
Car2	228	233.1	221.5	-1.05237	376.4	560.8	1.4899	847.8	445.9	-1.90132	Mus musculus carbonic anhydrase 2 (Car2), mRNA.
Caml	392.8	380.6	383.2	1.00683	412	446.1	1.08277	938.2	494.2	-1.89842	Mus musculus calcium modulating ligand (Caml), mRNA.
Dusp6	896.3	727.8	692.7	-1.05067	783.6	1082.6	1.38157	1636.4	862.2	-1.89794	Mus musculus dual specificity phosphatase 6 (Dusp6), mRNA.
Tap1	286.6	271.3	295.3	1.08846	295.7	352.2	1.19107	658.2	346.8	-1.89792	Mus musculus transporter 1, ATP-binding cassette, sub-family B (MDR/TAP) (Tap1), mRNA.
Fcgr3	810	785.2	830.2	1.05731	797.2	725.9	-1.09822	1451.4	768.1	-1.8896	Mus musculus Fc receptor, IgG, low affinity III (Fcgr3), mRNA.
Il27	151.8	174.7	154.7	-1.12928	505.6	450.6	-1.12206	3172.4	1683.1	-1.88486	Mus musculus interleukin 27 (Il27), mRNA.
Rab3d	2128.8	2459.7	2548	1.0359	2216.9	3415.5	1.54066	4612.3	2450.1	-1.88249	Mus musculus RAB3D, member RAS oncogene family (Rab3d), mRNA.
Bcl3	111.1	118.9	120.8	1.01598	248.6	226	-1.1	859.2	457.2	-1.87927	Mus musculus B-cell leukemia/lymphoma 3 (Bcl3), mRNA.
LOC381302	1955.4	1805	1857.9	1.02931	1522.3	1295.8	-1.1748	2680.2	1428	-1.87689
Tnfrsf1a	226.3	228.5	216.4	-1.05591	227.7	231	1.01449	433.4	231.2	-1.87457	Mus musculus tumor necrosis factor receptor superfamily, member 1a (Tnfrsf1a), mRNA.
Keap1	1580.3	1371.4	1396.5	1.0183	843.2	821.6	-1.02629	2233.7	1195.2	-1.86889	Mus musculus kelch-like ECH-associated protein 1 (Keap1), mRNA.
5031414D18Rik	202.5	198.3	193.4	-1.02534	87.5	85.1	-1.0282	238	127.4	-1.86813	Mus musculus RIKEN cDNA 5031414D18 gene (5031414D18Rik), mRNA.
Sbno2	112.2	109.7	109.6	-1.00091	118.8	112.4	-1.05694	237.1	127	-1.86693	Mus musculus strawberry notch homolog 2 (Drosophila) (Sbno2), mRNA.
Ext1	160.3	166.1	167.2	1.00662	181.8	206.8	1.13751	352.6	189.1	-1.86462	Mus musculus exostoses (multiple) 1 (Ext1), mRNA.
Rgs1	1042.6	984	1015.7	1.03222	1468	1755.1	1.19557	2364.2	1270.3	-1.86114	Mus musculus regulator of G-protein signaling 1 (Rgs1), mRNA.
Ifit2	2418.4	2478.7	2288.4	-1.08316	3065.6	3047	-1.0061	9962.1	5352.8	-1.8611	Mus musculus interferon-induced protein with tetratricopeptide repeats 2 (Ifit2), mRNA.
D16Ertd472e	212.4	188.2	204.7	1.08767	141.5	153	1.08127	300.5	161.6	-1.85953	Mus musculus DNA segment, Chr 16, ERATO Doi 472, expressed (D16Ertd472e), mRNA.
Klf6	955.8	1723.1	1567.5	-1.09927	1418.9	1789.1	1.26091	2363	1272	-1.8577	Mus musculus Kruppel-like factor 6 (Klf6), mRNA.
OTTMUSG00000000971	260.4	249	236.1	-1.05464	331.6	273.8	-1.2111	1224	659.1	-1.85708	Mus musculus predicted gene, OTTMUSG00000000971 (OTTMUSG00000000971), mRNA.
Hbegf	74.4	81.9	82.2	1.00366	122.4	189.5	1.5482	216	116.8	-1.84932	Mus musculus heparin-binding EGF-like growth factor (Hbegf), mRNA.
Hdc	644.6	676.7	711.5	1.05143	1151.4	1286.9	1.11768	3846.5	2083.1	-1.84653	Mus musculus histidine decarboxylase (Hdc), mRNA.
Apol9b	381	413.8	426	1.02948	494.2	610.5	1.23533	1024.1	557.1	-1.83827	Mus musculus apolipoprotein L 9b (Apol9b), mRNA.
Lpxn	3907.5	3751.8	3822.5	1.01884	3185	3587.2	1.12628	5264	2863.9	-1.83805	Mus musculus leupaxin (Lpxn), mRNA.
Rbm43	959.5	878.8	797	-1.10263	762.3	619.1	-1.2313	1607.8	878.3	-1.83058	Mus musculus RNA binding motif protein 43 (Rbm43), mRNA.
Zfp36	1775.3	12618.7	13536.1	1.0727	8414.2	7236.9	-1.16268	13463.5	7380.8	-1.82412	Mus musculus zinc finger protein 36 (Zfp36), mRNA.
Stat5a	140.5	146.1	137.9	-1.05946	186.1	184.3	-1.00977	729.1	399.7	-1.82412	Mus musculus signal transducer and activator of transcription 5A (Stat5a), mRNA.
A2bp1	117.5	112.2	116	1.03387	109.6	114.2	1.04197	288.9	158.4	-1.82386
Trim21	212.8	208	210.6	1.0125	183.9	206.5	1.12289	445.5	245.1	-1.81763	Mus musculus tripartite motif-containing 21 (Trim21), transcript variant 1, mRNA.
Tap2	1160.8	989.7	1094.9	1.10629	1145.7	1043.8	-1.09762	1949.7	1074.9	-1.81384	Mus musculus transporter 2, ATP-binding cassette, sub-family B (MDR/TAP) (Tap2), mRNA.
Rassf1	972.6	754.4	740.3	-1.01905	711	929	1.30661	1546.3	853.3	-1.81214	Mus musculus Ras association (RalGDS/AF-6) domain family member 1 (Rassf1), mRNA.
LOC100048721	64.2	73.3	63.6	-1.15252	248.4	413.3	1.66385	413.2	228.3	-1.8099	PREDICTED: Mus musculus similar to fibronectin leucine rich transmembrane protein 3, transcript variant 1 (LOC100048721), mRNA.
Pdzk1ip1	71.1	91.2	75.1	-1.21438	99.4	98	-1.01429	338.8	187.4	-1.8079	Mus musculus PDZK1 interacting protein 1 (Pdzk1ip1), mRNA.
C79267	229	233.3	229.4	-1.017	269.5	317.2	1.17699	511.3	282.9	-1.80735	Mus musculus expressed sequence C79267 (C79267), mRNA.
Map3k8	206.6	456.9	523.3	1.14533	308.7	386.5	1.25202	1004.9	558.5	-1.79928	Mus musculus mitogen-activated protein kinase kinase kinase 8 (Map3k8), mRNA.
Eif2ak2	4086.7	3718	3945.9	1.0613	3110.4	4124.6	1.32607	5602.9	3118.2	-1.79684	Mus musculus eukaryotic translation initiation factor 2-alpha kinase 2 (Eif2ak2), mRNA.
Eps8	291.2	320.7	313.4	-1.02329	314.3	445.9	1.41871	472.3	263	-1.79582	Mus musculus epidermal growth factor receptor pathway substrate 8 (Eps8), mRNA.
Tnfsf10	104.7	104.5	105.9	1.0134	97.7	98.3	1.00614	312.3	174	-1.79483	Mus musculus tumor necrosis factor (ligand) superfamily, member 10 (Tnfsf10), mRNA.
Tyki	3121.4	3667.6	3685.1	1.00477	6885.5	7084.6	1.02892	13843.3	7717.1	-1.79385
Ccnd2	80.1	85.1	76.3	-1.11533	82.5	79.8	-1.03383	216.4	120.8	-1.79139	Mus musculus cyclin D2 (Ccnd2), mRNA.
Igf2bp2	506.2	467.5	511.3	1.09369	731.1	961.2	1.31473	2115	1183.6	-1.78692	Mus musculus insulin-like growth factor 2 mRNA binding protein 2 (Igf2bp2), mRNA.
Stat2	550.7	433.7	367.5	-1.18014	356.2	402.6	1.13026	843.2	472.3	-1.78531	Mus musculus signal transducer and activator of transcription 2 (Stat2), mRNA.
Zeb2	708.2	832.6	777.3	-1.07114	654.3	624.2	-1.04822	1353.6	759	-1.7834	Mus musculus zinc finger E-box binding homeobox 2 (Zeb2), transcript variant 2, mRNA.
Tmem50b	285.4	289.1	274	-1.05511	270.8	292.7	1.08087	473.4	265.5	-1.78305	Mus musculus transmembrane protein 50B (Tmem50b), mRNA.
Hap1	188.5	173	168.6	-1.0261	154.1	176.8	1.14731	320.2	180	-1.77889	Mus musculus huntingtin-associated protein 1 (Hap1), mRNA.
Cd40	504.6	463.1	494	1.06672	1047.8	1478.7	1.41124	3482.9	1962.2	-1.775	Mus musculus CD40 antigen (Cd40), transcript variant 3, mRNA.
Mrc1	79.6	78.7	76.9	-1.02341	86.6	82.1	-1.05481	159.9	90.1	-1.77469	Mus musculus mannose receptor, C type 1 (Mrc1), mRNA.
Oas1b	139.7	107.5	116.3	1.08186	104.1	113	1.08549	219.7	123.8	-1.77464	Mus musculus 2'-5' oligoadenylate synthetase 1B (Oas1b), mRNA.
Actn1	1714.8	1749.2	1503.9	-1.16311	1766.4	1962.2	1.11085	2995.8	1688.7	-1.77403	Mus musculus actinin, alpha 1 (Actn1), mRNA.
Rnf31	165.5	144.4	147.9	1.02424	133.8	127.2	-1.05189	257.8	145.5	-1.77182	Mus musculus ring finger protein 31 (Rnf31), mRNA.
Endod1	2418.2	2164.8	2206.5	1.01926	1565.3	1714.1	1.09506	2912	1644.8	-1.77043	Mus musculus endonuclease domain containing 1 (Endod1), mRNA.
Plagl2	737.9	644.3	677	1.05075	1650.6	1506.6	-1.09558	4056.7	2292.3	-1.76971	Mus musculus pleiomorphic adenoma gene-like 2 (Plagl2), mRNA.
Lrp4	104.3	108.6	109.7	1.01013	119.3	126	1.05616	231.8	131.2	-1.76677	Mus musculus low density lipoprotein receptor-related protein 4 (Lrp4), mRNA.
Slc28a2	64.3	67.1	64.2	-1.04517	74.1	65.4	-1.13303	110.4	62.5	-1.7664	Mus musculus solute carrier family 28 (sodium-coupled nucleoside transporter), member 2 (Slc28a2), mRNA.
Il15	546	634.9	651.7	1.02646	1067.2	1032.3	-1.03381	2757.1	1561	-1.76624	Mus musculus interleukin 15 (Il15), mRNA.
Sh3bp2	2116.4	1625.4	1745	1.07358	1393.3	1827.9	1.31192	2474.7	1402.8	-1.76411	Mus musculus SH3-domain binding protein 2 (Sh3bp2), mRNA.
Bcar3	127.5	142	142.8	1.00563	141.1	171	1.21191	284.4	161.5	-1.76099	Mus musculus breast cancer anti-estrogen resistance 3 (Bcar3), mRNA.
Enpp4	577.1	567.5	571	1.00617	599.2	569	-1.05308	1208.2	686.5	-1.75994	Mus musculus ectonucleotide pyrophosphatase/phosphodiesterase 4 (Enpp4), mRNA.
Mt2	117	183.7	171.2	-1.07301	457.1	764.6	1.67272	1196.8	681.6	-1.75587	Mus musculus metallothionein 2 (Mt2), mRNA.
C130026I21Rik	1945.5	1947.5	1850.5	-1.05242	2398.4	2488	1.03736	6967.6	3970.2	-1.75497	Mus musculus RIKEN cDNA C130026I21 gene (C130026I21Rik), transcript variant 1, mRNA.
Ptger2	70	71.6	65	-1.10154	95.7	93.8	-1.02026	292.9	167.4	-1.7497	Mus musculus prostaglandin E receptor 2 (subtype EP2) (Ptger2), mRNA.
Ppp4r1	811.4	809	833.7	1.03053	746.6	799.2	1.07045	1278.6	732.3	-1.74601	Mus musculus protein phosphatase 4, regulatory subunit 1 (Ppp4r1), mRNA.
Gna15	159.7	174.8	156.3	-1.11836	109.3	125.4	1.1473	239.7	137.3	-1.74581	Mus musculus guanine nucleotide binding protein, alpha 15 (Gna15), mRNA.
Pols	911.1	865.1	904.1	1.04508	537.6	752	1.39881	1309.2	750.8	-1.74374	Mus musculus polymerase (DNA directed) sigma (Pols), mRNA.
Stk40	271	272.9	297.7	1.09088	745.2	853.3	1.14506	1137.6	652.8	-1.74265	Mus musculus serine/threonine kinase 40 (Stk40), mRNA.
Ptk2b	186.4	193	205.1	1.06269	185.2	183.6	-1.00871	405.3	233.5	-1.73576	Mus musculus PTK2 protein tyrosine kinase 2 beta (Ptk2b), mRNA.
Fzd5	164.7	160.1	164.5	1.02748	229.1	399.5	1.74378	330.1	191	-1.72827	Mus musculus frizzled homolog 5 (Drosophila) (Fzd5), transcript variant 1, mRNA.
Evl	380.8	380.1	331.3	-1.1473	347.6	315.5	-1.10174	556.4	322.7	-1.7242	Mus musculus Ena-vasodilator stimulated phosphoprotein (Evl), mRNA. XM_923143
Csf1	86.2	88.5	75.4	-1.17374	92.1	88.1	-1.0454	199.5	116	-1.71983	Mus musculus colony stimulating factor 1 (macrophage) (Csf1), mRNA.
Triobp	1430.1	1465.2	1482.1	1.01153	1354.2	1567.2	1.15729	2386.6	1388.1	-1.71933	Mus musculus TRIO and F-actin binding protein (Triobp), transcript variant 3, mRNA.
Gm962	576.7	430.5	414.3	-1.0391	226	215.4	-1.04921	554.8	322.8	-1.71871	Mus musculus gene model 962, (NCBI) (Gm962), mRNA.
Sh3pxd2b	467.9	449	445.2	-1.00854	493.3	513.6	1.04115	863.3	502.6	-1.71767	Mus musculus SH3 and PX domains 2B (Sh3pxd2b), mRNA.
Plekhf2	789.3	784.3	773.2	-1.01436	620.4	720.6	1.16151	1165.1	679.8	-1.71389	Mus musculus pleckstrin homology domain containing, family F (with FYVE domain) member 2 (Plekhf2), mRNA.
LOC100048299	2298.4	2388.7	2152.5	-1.10973	1733.4	1699.4	-1.02001	2924.5	1709	-1.71123	PREDICTED: Mus musculus similar to Myn protein - mouse (LOC100048299), mRNA.
Samhd1	1837.3	2234.6	1875.3	-1.1916	1629.8	1741.8	1.06872	2874.1	1680.5	-1.71026	Mus musculus SAM domain and HD domain, 1 (Samhd1), mRNA.
Vps37b	411.9	370.6	362.6	-1.02206	308	365.5	1.18669	703.2	411.9	-1.70721	Mus musculus vacuolar protein sorting 37B (yeast) (Vps37b), mRNA.
LOC100046883	2117.3	1856.6	2026.6	1.09157	1756.8	2118.6	1.20594	2881.9	1690.6	-1.70466	PREDICTED: Mus musculus similar to CKLF-like MARVEL transmembrane domain containing 3 (LOC100046883), mRNA.
Vps54	472	440.1	442.4	1.00523	387	389.6	1.00672	780.2	458.2	-1.70275	Mus musculus vacuolar protein sorting 54 (yeast) (Vps54), mRNA.
Tmem2	140.5	135.8	133.3	-1.01875	219.4	244.5	1.1144	471.3	276.8	-1.70267	Mus musculus transmembrane protein 2 (Tmem2), transcript variant 2, mRNA.
Hoxb4	187	187.4	172.7	-1.08512	160.1	147.4	-1.08616	323.7	190.2	-1.70189	Mus musculus homeo box B4 (Hoxb4), mRNA.
Zfp281	185.3	159.7	177.7	1.11271	211.7	206.1	-1.02717	388.9	228.8	-1.69974	Mus musculus zinc finger protein 281 (Zfp281), mRNA.
Car13	1002	935	981	1.0492	1509.4	1485.8	-1.01588	3629.8	2135.8	-1.6995	Mus musculus carbonic anhydrase 13 (Car13), mRNA.
Src	81	80.9	77.8	-1.03985	108.9	133.6	1.22681	285.2	168.1	-1.69661	Mus musculus Rous sarcoma oncogene (Src), transcript variant 2, mRNA.
Fgd6	542.6	716.5	662.5	-1.08151	525.9	548.9	1.04373	1314.1	774.9	-1.69583	Mus musculus FYVE, RhoGEF and PH domain containing 6 (Fgd6), mRNA.
Phc2	1357.7	1286.9	1468.2	1.14088	1373.9	1622.2	1.18073	2107.8	1243	-1.69574	Mus musculus polyhomeotic-like 2 (Drosophila) (Phc2), mRNA.
Ndrl	1349.4	1502.9	1535.5	1.02169	1237.6	2301.2	1.85941	1611.4	950.8	-1.69478
4933428G20Rik	184.6	190.2	193.5	1.01735	159.6	180.7	1.13221	453.1	267.5	-1.69383	Mus musculus RIKEN cDNA 4933428G20 gene (4933428G20Rik), mRNA.
Tlk2	1214.6	1251.8	1298.6	1.03739	937.4	921.5	-1.01725	1628.7	961.7	-1.69356	Mus musculus tousled-like kinase 2 (Arabidopsis) (Tlk2), mRNA.
Rab19	128.7	113.2	114.2	1.00883	95	101.1	1.06421	193.1	114.1	-1.69238	Mus musculus RAB19, member RAS oncogene family (Rab19), mRNA.
Crkl	318.4	274.1	255.1	-1.07448	250.3	238.9	-1.04772	395	233.4	-1.69237	Mus musculus v-crk sarcoma virus CT10 oncogene homolog (avian)-like (Crkl), mRNA.
Pik3r6	156.7	164.5	161.2	-1.02047	139.1	122.2	-1.1383	344.9	204	-1.69069	Mus musculus phosphoinositide-3-kinase, regulatory subunit 6 (Pik3r6), transcript variant 2, mRNA.
Ush2a	330.7	488.1	564.2	1.15591	195.9	231.5	1.18173	401.7	238	-1.68782	Mus musculus Usher syndrome 2A (autosomal recessive, mild) homolog (human) (Ush2a), mRNA.
Sp100	259.9	253.5	277.4	1.09428	254.6	337.5	1.32561	456.7	271	-1.68524	Mus musculus nuclear antigen Sp100 (Sp100), mRNA.
Mizf	159.6	148.2	161.3	1.08839	130.7	141.9	1.08569	217.8	129.5	-1.68185	Mus musculus MBD2-interacting zinc finger (Mizf), mRNA.
Lck	398.9	351.1	355.1	1.01139	316.7	282.3	-1.12186	587	349.3	-1.6805	Mus musculus lymphocyte protein tyrosine kinase (Lck), mRNA.
Bach1	140.8	130	129.5	-1.00386	154.5	218.5	1.41424	187.2	111.4	-1.68043	Mus musculus BTB and CNC homology 1 (Bach1), mRNA.
Map2k4	551.6	591	589.8	-1.00203	643.1	726.2	1.12922	1186.5	706.1	-1.68036	Mus musculus mitogen activated protein kinase kinase 4 (Map2k4), mRNA.
Ptpro	603.5	622.2	619.6	-1.0042	321.5	322.9	1.00435	456.2	271.5	-1.68029	Mus musculus protein tyrosine phosphatase, receptor type, O (Ptpro), mRNA.
3300001P08Rik	2544.2	2506.3	2412.9	-1.03871	1904.5	1886.8	-1.00938	3510.4	2091	-1.67881	Mus musculus RIKEN cDNA 3300001P08 gene (3300001P08Rik), mRNA.
Il17ra	140	137.2	120.6	-1.13765	133.7	132.4	-1.00982	224.9	134.1	-1.67711	Mus musculus interleukin 17 receptor A (Il17ra), mRNA.
Vezf1	361.7	294.4	296.8	1.00815	244.4	313.4	1.28232	366.2	218.4	-1.67674	Mus musculus vascular endothelial zinc finger 1 (Vezf1), mRNA.
Prkx	832.8	843.6	887.7	1.05228	997	1004.2	1.00722	1610.8	961.2	-1.67582	Mus musculus protein kinase, X-linked (Prkx), mRNA.
Setdb2	197	218.9	226.7	1.03563	156.2	178.3	1.14149	337.1	201.6	-1.67212	Mus musculus SET domain, bifurcated 2 (Setdb2), mRNA.
Fas	144.1	152.5	145.3	-1.04955	321.2	289.8	-1.10835	1186.3	709.9	-1.67108	Mus musculus Fas (TNF receptor superfamily member 6) (Fas), mRNA.
Adora2b	339.8	275.8	296.1	1.0736	2094.5	2336.7	1.11564	3897.6	2335	-1.66921	Mus musculus adenosine A2b receptor (Adora2b), mRNA.
Ppm1l	515.7	524.6	530	1.01029	491.7	565.7	1.1505	1088.8	653.2	-1.66687	Mus musculus protein phosphatase 1 (formerly 2C)-like (Ppm1l), mRNA.
E030034P13Rik	118.1	109.3	131.7	1.20494	97.4	95.2	-1.02311	218	130.8	-1.66667
Rnf135	343.8	306	312.8	1.02222	489.7	570	1.16398	913.4	548.1	-1.66648	Mus musculus ring finger protein 135 (Rnf135), mRNA.
Stat1	1138.2	1096.3	1154.7	1.05327	841.2	926.4	1.10128	1534.2	923.3	-1.66165	Mus musculus signal transducer and activator of transcription 1 (Stat1), mRNA.
Slc4a2	890.5	803.6	834.2	1.03808	669.7	835.8	1.24802	1039.6	626.6	-1.65911	Mus musculus solute carrier family 4 (anion exchanger), member 2 (Slc4a2), mRNA.
Ass1	151.2	147.9	164.7	1.11359	174.4	180.9	1.03727	718.5	434.1	-1.65515	Mus musculus argininosuccinate synthetase 1 (Ass1), mRNA.
Adck1	205.4	202.8	213	1.0503	182.4	195.4	1.07127	278.3	168.4	-1.65261	Mus musculus aarF domain containing kinase 1 (Adck1), mRNA.
Furin	447	457	485.3	1.06193	908.8	984.5	1.0833	2267.8	1372.3	-1.65255	Mus musculus furin (paired basic amino acid cleaving enzyme) (Furin), mRNA.
Rgs2	105.4	96.1	105.7	1.0999	84.3	83.1	-1.01444	105.7	64	-1.65156
1190005F20Rik	696.4	619.9	642	1.03565	527.8	499.8	-1.05602	974.1	590.7	-1.64906	Mus musculus RIKEN cDNA 1190005F20 gene (1190005F20Rik), mRNA.
Parp14	3864	3791.8	3651.6	-1.03839	4636.2	5941.3	1.2815	7866.9	4775.5	-1.64735	Mus musculus poly (ADP-ribose) polymerase family, member 14 (Parp14), mRNA. XM_901644 XM_916789 XM_924484 XM_924488
Gpr109a	346	236.9	227.6	-1.04086	858	794.9	-1.07938	2495	1514.9	-1.64697	Mus musculus G protein-coupled receptor 109A (Gpr109a), mRNA.
Irf2	2904.1	3097.7	2914.6	-1.06282	1870.8	1658.7	-1.12787	2958.8	1796.9	-1.64661	Mus musculus interferon regulatory factor 2 (Irf2), mRNA.
Bcl2l1	211.7	220.6	217.3	-1.01519	253.6	301.4	1.18849	696.4	423.1	-1.64595	Mus musculus BCL2-like 1 (Bcl2l1), nuclear gene encoding mitochondrial protein, mRNA.
Myd88	6527.4	6607.7	6793.2	1.02807	6114.4	6492.4	1.06182	9565.4	5813.7	-1.64532	Mus musculus myeloid differentiation primary response gene 88 (Myd88), mRNA.
Cd164	1885.4	1949.7	1840	-1.05962	1786.4	1981.2	1.10905	2909.9	1771.9	-1.64225	Mus musculus CD164 antigen (Cd164), mRNA.
Ndrg1	1533.5	1635.4	1642	1.00404	1354.3	2615.3	1.93111	1704.1	1037.7	-1.64219	Mus musculus N-myc downstream regulated gene 1 (Ndrg1), mRNA.
Mlkl	903.6	892.6	877.1	-1.01767	947.9	1011.5	1.0671	1767	1076.1	-1.64204	Mus musculus mixed lineage kinase domain-like (Mlkl), mRNA. XM_924589
Mobkl2b	94	101.9	97	-1.05052	102.4	88.5	-1.15706	146.1	89	-1.64157	Mus musculus MOB1, Mps One Binder kinase activator-like 2B (yeast) (Mobkl2b), mRNA.
Zfp282	620.6	623.4	613.9	-1.01547	290.8	275.7	-1.05477	577.2	351.9	-1.64024	Mus musculus zinc finger protein 282 (Zfp282), mRNA.
BC006779	878.5	885.6	868.7	-1.01945	959.1	1226.6	1.27891	1635.6	998.4	-1.63822	Mus musculus cDNA sequence BC006779 (BC006779), mRNA. XM_001001098 XM_001003843 XM_001003848 XM_001003853 XM_001003857 XM_994341 XM_994355 XM_994381 XM_994398
Tob2	229.4	184	200.6	1.09022	171	174.7	1.02164	285.4	174.3	-1.63741	Mus musculus transducer of ERBB2, 2 (Tob2), mRNA.
Slc17a6	136.7	181.2	170	-1.06588	234.9	338.1	1.43934	356.2	217.8	-1.63545	Mus musculus solute carrier family 17 (sodium-dependent inorganic phosphate cotransporter), member 6 (Slc17a6), mRNA.
Edg5	183.5	180.4	173.9	-1.03738	157.9	128.6	-1.22784	238	145.6	-1.63462	Mus musculus endothelial differentiation, sphingolipid G-protein-coupled receptor, 5 (Edg5), mRNA.
Gmppb	287.2	284.6	238.5	-1.19329	266.4	277.1	1.04017	536.9	328.8	-1.63291
Trafd1	1675.2	1724.6	1752.5	1.01618	1564.7	1843.9	1.17844	2497.5	1530.1	-1.63225	Mus musculus TRAF type zinc finger domain containing 1 (Trafd1), mRNA.
Irf8	722.6	808.8	827.9	1.02362	572.5	517.3	-1.10671	1792.7	1098.5	-1.63195	Mus musculus interferon regulatory factor 8 (Irf8), mRNA.
LOC100048346	11078.8	11118.9	10294.1	-1.08012	8653.5	9129.1	1.05496	17200.8	10540.7	-1.63185	PREDICTED: Mus musculus similar to ubiquitin specific protease UBP43 (LOC100048346), mRNA.
Tnfsf15	75.4	67	70.5	1.05224	60.1	71	1.18136	120.1	73.7	-1.62958	Mus musculus tumor necrosis factor (ligand) superfamily, member 15 (Tnfsf15), mRNA.
Fbxl5	121.5	120.5	126	1.04564	114	102.4	-1.11328	217.6	133.6	-1.62874	Mus musculus F-box and leucine-rich repeat protein 5 (Fbxl5), mRNA.
Ppp1r15b	263.8	302.1	308.4	1.02085	363.4	428.7	1.17969	613.4	376.7	-1.62835
Rabif	271.9	264.5	259	-1.02124	241.4	255.6	1.05882	406.8	250.7	-1.62266	Mus musculus RAB interacting factor (Rabif), mRNA.
Ppp1r10	911.3	1282.8	1251	-1.02542	727.6	1120	1.53931	1003.2	619.3	-1.61989	Mus musculus protein phosphatase 1, regulatory subunit 10 (Ppp1r10), mRNA.
Usp18	9545.1	10567.6	9885.4	-1.06901	8310.9	9148.8	1.10082	16001.7	9885.5	-1.6187	Mus musculus ubiquitin specific peptidase 18 (Usp18), mRNA.
Ppp1r9b	376	354.2	327.8	-1.08054	262.1	240.8	-1.08846	413.6	255.9	-1.61626	Mus musculus protein phosphatase 1, regulatory subunit 9B (Ppp1r9b), mRNA.
Il13ra2	100.4	94.4	110.4	1.16949	201.2	216.4	1.07555	462.3	286.2	-1.6153	Mus musculus interleukin 13 receptor, alpha 2 (Il13ra2), mRNA.
Hlx	91.2	87.9	96.6	1.09898	146	126.5	-1.15415	219	135.6	-1.61504	Mus musculus H2.0-like homeobox (Hlx), mRNA.
Slc29a3	221.8	216.2	208.6	-1.03643	154.3	194.9	1.26312	430.3	266.9	-1.61221	Mus musculus solute carrier family 29 (nucleoside transporters), member 3 (Slc29a3), mRNA.
Syvn1	3487.1	3355.5	3640.9	1.08505	2510.8	3307.7	1.31739	3514.1	2179.9	-1.61205	Mus musculus synovial apoptosis inhibitor 1, synoviolin (Syvn1), mRNA.
Ccl2	109.9	151	168.3	1.11457	1378.1	1378.1	1	4793.3	2976.7	-1.61027	Mus musculus chemokine (C-C motif) ligand 2 (Ccl2), mRNA.
Ercc1	205.8	194.5	211.7	1.08843	252.7	309.3	1.22398	414	257.2	-1.60964	Mus musculus excision repair cross-complementing rodent repair deficiency, complementation group 1 (Ercc1), mRNA.
Sepw1	416.8	385.2	384.1	-1.00286	581.4	547.7	-1.06153	1163.7	723.9	-1.60754	Mus musculus selenoprotein W, muscle 1 (Sepw1), mRNA.
Tcirg1	1166.1	1162.4	1157.1	-1.00458	1282.2	1445.8	1.12759	2272.1	1413.7	-1.6072	Mus musculus T-cell, immune regulator 1, ATPase, H+ transporting, lysosomal V0 protein A3 (Tcirg1), mRNA.
Tlr3	88.3	94.6	92.5	-1.0227	87.1	97.7	1.1217	138.8	86.4	-1.60648	Mus musculus toll-like receptor 3 (Tlr3), mRNA.
Luc7l	522.9	446.3	443.6	-1.00609	392.9	412.8	1.05065	738.1	459.8	-1.60526	Mus musculus Luc7 homolog (S. cerevisiae)-like (Luc7l), transcript variant 2, mRNA.
Uaca	1811.1	1745.6	1776.7	1.01782	880.6	1071.7	1.21701	1237.6	771.1	-1.60498	Mus musculus uveal autoantigen with coiled-coil domains and ankyrin repeats (Uaca), mRNA.
Psmb8	482.9	445.4	469	1.05299	517.8	483.4	-1.07116	818.1	510	-1.60412	Mus musculus proteasome (prosome, macropain) subunit, beta type 8 (large multifunctional peptidase 7) (Psmb8), mRNA.
Havcr2	144.3	152.4	142.4	-1.07022	327.5	459.4	1.40275	540.6	337.3	-1.60273	Mus musculus hepatitis A virus cellular receptor 2 (Havcr2), mRNA.
Ihpk1	322.2	331.5	317.1	-1.04541	225.8	274.1	1.21391	355.3	221.7	-1.60262	Mus musculus inositol hexaphosphate kinase 1 (Ihpk1), mRNA.
Ep300	468.6	417.2	417.5	1.00072	321.1	287.8	-1.11571	428.3	267.6	-1.60052	Mus musculus E1A binding protein p300 (Ep300), mRNA.
Tgm2	111.8	143.6	152	1.0585	431.6	708.4	1.64133	822.3	514.1	-1.59949	Mus musculus transglutaminase 2, C polypeptide (Tgm2), mRNA.
Tmco3	107.1	117.6	113.3	-1.03795	127.7	141.2	1.10572	263.9	165	-1.59939	Mus musculus transmembrane and coiled-coil domains 3 (Tmco3), mRNA.
Setd1b	322.3	270.5	268.1	-1.00895	216.8	203.7	-1.06431	446	279.1	-1.59799	Mus musculus SET domain containing 1B (Setd1b), mRNA.
Irf7	1552	1647.4	1543.7	-1.06718	1559.1	1789.9	1.14803	3103.4	1942.1	-1.59796	Mus musculus interferon regulatory factor 7 (Irf7), mRNA.
Cyp2s1	124	129.9	133.7	1.02925	141.1	163.1	1.15592	264.6	165.6	-1.59783	Mus musculus cytochrome P450, family 2, subfamily s, polypeptide 1 (Cyp2s1), mRNA.
1810026J23Rik	473.5	374.6	439.8	1.17405	274.1	277.6	1.01277	483.4	302.7	-1.59696	Mus musculus RIKEN cDNA 1810026J23 gene (1810026J23Rik), mRNA.
Oas2	1370.6	1291	1390.7	1.07723	1132.8	1380	1.21822	2090	1309.2	-1.59639	Mus musculus 2'-5' oligoadenylate synthetase 2 (Oas2), mRNA.
LOC100046232	1232.7	1454.5	1423.8	-1.02156	1401.5	1210.7	-1.15759	1707.2	1070.3	-1.59507	PREDICTED: Mus musculus similar to NFIL3/E4BP4 transcription factor (LOC100046232), mRNA.
Pla1a	86	87.2	84	-1.0381	88.9	91	1.02362	159.8	100.2	-1.59481
LOC100045567	4726.7	5094.1	4987.2	-1.02143	4512.6	5297	1.17382	7705.9	4832.6	-1.59457	PREDICTED: Mus musculus similar to purine nucleoside phosphorylase (LOC100045567), mRNA.
Il6	76.5	76.6	81.1	1.05875	170.5	151.2	-1.12765	481.7	302.6	-1.59187	Mus musculus interleukin 6 (Il6), mRNA.
Ripk2	161.1	176.5	167.3	-1.05499	208.7	257.1	1.23191	514.9	323.7	-1.59067	Mus musculus receptor (TNFRSF)-interacting serine-threonine kinase 2 (Ripk2), mRNA.
Zcchc6	1210.6	1285.5	1314.1	1.02225	1319.5	1419.7	1.07594	2065.6	1302.5	-1.58587	Mus musculus zinc finger, CCHC domain containing 6 (Zcchc6), mRNA.
Zfp46	559.2	471.3	451.6	-1.04362	318.3	396.1	1.24442	653.6	412.4	-1.58487	Mus musculus zinc finger protein 46 (Zfp46), mRNA.
Abcg1	190.1	165.9	201.2	1.21278	113.7	112.9	-1.00709	127.3	80.7	-1.57745
Slc12a9	302.2	310.5	316.7	1.01997	238.9	254.1	1.06362	490.2	311.1	-1.5757	Mus musculus solute carrier family 12 (potassium/chloride transporters), member 9 (Slc12a9), mRNA.
Socs3	238.7	1715.1	1742.6	1.01603	5297	6401.2	1.20846	15561	9896.2	-1.57242	Mus musculus suppressor of cytokine signaling 3 (Socs3), mRNA.
Zc3h12d	94.3	86.6	81.2	-1.0665	82.3	79.9	-1.03004	139.8	89	-1.57079	Mus musculus zinc finger CCCH type containing 12D (Zc3h12d), mRNA.
Fam129a	240.8	252.6	244.6	-1.03271	281.4	351	1.24733	537.9	343.1	-1.56776	Mus musculus family with sequence similarity 129, member A (Fam129a), mRNA.
Xrn1	133.4	119.9	131.1	1.09341	142.4	146.1	1.02598	206.1	131.5	-1.5673	Mus musculus 5'-3' exoribonuclease 1 (Xrn1), mRNA.
Smg7	728.7	664.7	651.3	-1.02057	748.6	812.9	1.08589	1175.8	750.6	-1.56648	Mus musculus Smg-7 homolog, nonsense mediated mRNA decay factor (C. elegans) (Smg7), mRNA.
Sphk2	263.7	252.6	234.9	-1.07535	205.2	193.3	-1.06156	353.8	226	-1.56549	Mus musculus sphingosine kinase 2 (Sphk2), transcript variant 2, mRNA.
Scin	76.8	84.6	78.8	-1.0736	103.1	121.7	1.18041	169.3	108.2	-1.5647	Mus musculus scinderin (Scin), mRNA.
Dync1h1	336.9	264.1	320.7	1.21431	275.1	319.6	1.16176	469.9	300.4	-1.56425	Mus musculus dynein cytoplasmic 1 heavy chain 1 (Dync1h1), mRNA.
LOC435565	81.2	73.1	80	1.09439	68.9	81.8	1.18723	123.5	79	-1.56329	Mus musculus similar to interferon-inducible GTPase (LOC435565), mRNA.
Atg16l1	762.9	708.1	700.5	-1.01085	446.9	443.8	-1.00699	896.8	573.7	-1.56319	Mus musculus autophagy-related 16-like 1 (yeast) (Atg16l1), transcript variant b, mRNA.
Phf11	707.5	764.4	723.8	-1.05609	686.7	714.4	1.04034	1199.5	767.8	-1.56226	Mus musculus PHD finger protein 11 (Phf11), mRNA.
Gstt4	73.2	72.9	74.9	1.02743	83.3	83.3	1	162.6	104.2	-1.56046	Mus musculus glutathione S-transferase, theta 4 (Gstt4), mRNA.
Dtx2	266	291.5	317.3	1.08851	213.5	218.2	1.02201	327.4	209.9	-1.55979	Mus musculus deltex 2 homolog (Drosophila) (Dtx2), mRNA.
Ccdc25	153.4	166.2	144.8	-1.14779	169.3	173.5	1.02481	291.7	187.7	-1.55408	Mus musculus coiled-coil domain containing 25 (Ccdc25), mRNA.
LOC100047963	2902.9	3012	2794.5	-1.07783	2791.8	3592.9	1.28695	4894.3	3149.4	-1.55404	PREDICTED: Mus musculus similar to ADIR1 (LOC100047963), mRNA.
Sec24b	618.7	609.7	599.2	-1.01752	590.5	626.9	1.06164	1087.9	700.2	-1.5537	Mus musculus Sec24 related gene family, member B (S. cerevisiae) (Sec24b), mRNA.
Trps1	164.7	197.2	192.5	-1.02442	193.3	180.2	-1.0727	292.5	188.3	-1.55337	Mus musculus trichorhinophalangeal syndrome I (human) (Trps1), mRNA.
Trim25	304.6	299.5	328.3	1.09616	423.9	550.8	1.29936	672.4	433.3	-1.55181	Mus musculus tripartite motif protein 25 (Trim25), mRNA.
LOC100048105	9354.7	15016.5	14753.8	-1.01781	4586	4777.1	1.04167	8602.5	5545.9	-1.55115	PREDICTED: Mus musculus similar to Ubc protein, transcript variant 1 (LOC100048105), mRNA.
Itgav	142	173	174	1.00578	372.3	437.9	1.1762	934.3	602.8	-1.54993	Mus musculus integrin alpha V (Itgav), mRNA.
Apbb2	159.9	177.4	170.6	-1.03986	175.3	173.1	-1.01271	324.5	209.4	-1.54967	Mus musculus amyloid beta (A4) precursor protein-binding, family B, member 2 (Apbb2), mRNA.
Dusp7	240	201.3	185.4	-1.08576	181	237.3	1.31105	367.9	237.5	-1.54905	Mus musculus dual specificity phosphatase 7 (Dusp7), mRNA.
EG665378	180.3	164.1	184.8	1.12614	194.1	194	-1.00052	297.2	191.9	-1.54872	Mus musculus predicted gene, EG665378 (EG665378), mRNA.
Whdc1	161	174.2	169.2	-1.02955	149.5	141.5	-1.05654	287.8	186	-1.54731	Mus musculus WAS protein homology region 2 domain containing 1 (Whdc1), mRNA.
Lrrc33	1583.9	1665.4	1673.8	1.00504	612.2	575.1	-1.06451	1580.5	1022	-1.54648	Mus musculus leucine rich repeat containing 33 (Lrrc33), mRNA.
Kcnn4	603.3	602.2	560.3	-1.07478	723.3	1039.6	1.4373	1408.3	911.8	-1.54453	Mus musculus potassium intermediate/small conductance calcium-activated channel, subfamily N, member 4 (Kcnn4), mRNA.
Ptprj	96.6	97.3	92.5	-1.05189	125.4	137.9	1.09968	266.2	172.4	-1.54408	Mus musculus protein tyrosine phosphatase, receptor type, J (Ptprj), mRNA.
Pstpip1	1157.9	1302.5	1238.3	-1.05185	1186.5	1222.2	1.03009	3065.6	1986	-1.54361	Mus musculus proline-serine-threonine phosphatase-interacting protein 1 (Pstpip1), mRNA.
AA960436	1053.8	1082.7	1073.6	-1.00848	1225.4	1180.1	-1.03839	2125.9	1378.5	-1.54218	Mus musculus expressed sequence AA960436 (AA960436), mRNA.
Frs2	133.5	131.8	148.4	1.12595	120.5	111.3	-1.08266	139.9	90.8	-1.54075	Mus musculus fibroblast growth factor receptor substrate 2 (Frs2), mRNA.
Ubtd1	305.9	295.7	286	-1.03392	196.2	189.3	-1.03645	268.9	174.7	-1.53921	Mus musculus ubiquitin domain containing 1 (Ubtd1), mRNA.
Cttnbp2nl	1386.6	1847.7	1860	1.00666	1384.4	1337	-1.03545	1956.1	1270.9	-1.53915	Mus musculus CTTNBP2 N-terminal like (Cttnbp2nl), mRNA.
Usp19	140.2	141.6	173.8	1.2274	148.7	159.6	1.0733	196.8	127.9	-1.5387	Mus musculus ubiquitin specific peptidase 19 (Usp19), mRNA.
Rhbdf2	134.4	138.4	146.2	1.05636	219.8	197.9	-1.11066	314	204.1	-1.53846	Mus musculus rhomboid 5 homolog 2 (Drosophila) (Rhbdf2), mRNA.
Slc12a7	146.5	135.8	143.4	1.05596	99.5	104.5	1.05025	175.2	113.9	-1.53819	Mus musculus solute carrier family 12, member 7 (Slc12a7), mRNA.
B230339H12Rik	150.2	164.2	177.8	1.08283	186.9	204.6	1.0947	369.5	240.6	-1.53574
Rsad2	6544.4	8336.5	8350.6	1.00169	22493.5	24071.4	1.07015	34941.8	22756.3	-1.53548	Mus musculus radical S-adenosyl methionine domain containing 2 (Rsad2), mRNA.
Slc25a25	308.3	325.4	314.6	-1.03433	212.5	248.9	1.17129	416.7	271.5	-1.53481	Mus musculus solute carrier family 25 (mitochondrial carrier, phosphate carrier), member 25 (Slc25a25), nuclear gene encoding mitochondrial protein, mRNA.
Pitpnm1	131.3	115.4	118.1	1.0234	115.5	133.8	1.15844	184.7	120.4	-1.53405	Mus musculus phosphatidylinositol membrane-associated 1 (Pitpnm1), mRNA.
Ap3m2	174.8	136.5	134.7	-1.01336	104.5	115.6	1.10622	205.6	134.1	-1.53318	Mus musculus adaptor-related protein complex 3, mu 2 subunit (Ap3m2), mRNA.
Arhgap25	168.2	163.6	169.8	1.0379	106.5	165.2	1.55117	167.8	109.5	-1.53242	Mus musculus Rho GTPase activating protein 25 (Arhgap25), transcript variant 2, mRNA. XM_899325 XM_899332 XM_899339 XM_899344 XM_914946 XM_923470 XM_923471 XM_923481 XM_923488 XM_923492 XM_923496 XM_923499 XM_923504
LOC100045644	934	1037.7	1085.7	1.04626	1205.2	1860	1.54331	1932.3	1261.1	-1.53223	PREDICTED: Mus musculus hypothetical protein LOC100045644 (LOC100045644), mRNA.
Tor1aip1	1316.1	1574.3	1590.1	1.01004	1543.7	2087.9	1.35253	2315.9	1511.5	-1.53219	Mus musculus torsin A interacting protein 1 (Tor1aip1), mRNA.
Pqlc1	1667.2	1605	1568	-1.0236	1008.6	1368.5	1.35683	1564.8	1021.3	-1.53216	Mus musculus PQ loop repeat containing 1 (Pqlc1), mRNA.
Zbtb32	173.1	163.8	173.4	1.05861	263.6	252	-1.04603	579.1	378.3	-1.5308	Mus musculus zinc finger and BTB domain containing 32 (Zbtb32), mRNA.
LOC100044190	1069.3	1029.3	1093	1.06189	1008.9	984.2	-1.0251	1805.8	1180.9	-1.52917	PREDICTED: Mus musculus hypothetical protein LOC100044190 (LOC100044190), mRNA.
6330578E17Rik	1172.9	1073.4	1035.8	-1.0363	871.7	991.4	1.13732	1614.8	1056.1	-1.52902	Mus musculus RIKEN cDNA 6330578E17 gene (6330578E17Rik), mRNA.
Stx3	216.7	227.5	230.3	1.01231	302.3	368.8	1.21998	469.5	307.3	-1.52782	Mus musculus syntaxin 3 (Stx3), transcript variant C, mRNA.
Slc9a1	336	321.9	307	-1.04853	269	342.5	1.27323	390.3	255.6	-1.527	Mus musculus solute carrier family 9 (sodium/hydrogen exchanger), member 1 (Slc9a1), mRNA.
4831426I19Rik	280.7	210	247.6	1.17905	212.7	223.7	1.05172	431.6	282.7	-1.52671	Mus musculus RIKEN cDNA 4831426I19 gene (4831426I19Rik), transcript variant 2, mRNA.
Flrt2	401.5	494.3	516.6	1.04511	712.2	964.6	1.35439	1226.2	803.6	-1.52588	Mus musculus fibronectin leucine rich transmembrane protein 2 (Flrt2), mRNA.
Sh3kbp1	344.2	348	323.7	-1.07507	363.6	406.8	1.11881	629.9	412.9	-1.52555	Mus musculus SH3-domain kinase binding protein 1 (Sh3kbp1), mRNA.
Slc45a3	144.1	158.1	147.8	-1.06969	121.5	117	-1.03846	219.8	144.1	-1.52533	Mus musculus solute carrier family 45, member 3 (Slc45a3), mRNA.
BC017643	676.6	541.3	510.2	-1.06096	382.9	338.1	-1.13251	634	415.8	-1.52477	Mus musculus cDNA sequence BC017643 (BC017643), mRNA.
Gclm	412.8	397	395.3	-1.0043	478.5	462.5	-1.03459	687.6	451.1	-1.52427	Mus musculus glutamate-cysteine ligase , modifier subunit (Gclm), mRNA.
Slc6a4	71.6	73.2	76.2	1.04098	74.8	86.8	1.16043	128.3	84.2	-1.52375	Mus musculus solute carrier family 6 (neurotransmitter transporter, serotonin), member 4 (Slc6a4), mRNA.
Casp1	5218.5	5469.8	5308.9	-1.03031	4816.8	4775.5	-1.00865	7935.8	5210	-1.52319	Mus musculus caspase 1 (Casp1), mRNA.
Tmem106a	683.5	634.2	685.5	1.08089	648.9	612.8	-1.05891	1054.6	692.9	-1.52201	Mus musculus transmembrane protein 106A (Tmem106a), mRNA.
Golga1	175.5	140.5	149.4	1.06335	134.4	154.5	1.14955	209.6	137.8	-1.52104	Mus musculus golgi autoantigen, golgin subfamily a, 1 (Golga1), mRNA.
Capn5	374.5	391.4	406.9	1.0396	348.9	378.7	1.08541	628.5	413.8	-1.51885	Mus musculus calpain 5 (Capn5), mRNA.
Nuak2	517.3	452.1	479.2	1.05994	331.3	380.7	1.14911	561.8	369.9	-1.51879	Mus musculus NUAK family, SNF1-like kinase, 2 (Nuak2), mRNA.
BC017647	552.1	577.2	594.5	1.02997	470	427.6	-1.09916	827.1	544.6	-1.51873	Mus musculus cDNA sequence BC017647 (BC017647), mRNA.
Tceb3	403.3	366.8	407.5	1.11096	358.9	341.2	-1.05188	543	357.7	-1.51803	Mus musculus transcription elongation factor B (SIII), polypeptide 3 (Tceb3), mRNA.
Zbp1	143.1	147.7	151.1	1.02302	187	200.5	1.07219	326.9	215.4	-1.51764	Mus musculus Z-DNA binding protein 1 (Zbp1), mRNA.
Sphk1	74.6	72.9	72.3	-1.0083	78.8	95.3	1.20939	112.4	74.1	-1.51687	Mus musculus sphingosine kinase 1 (Sphk1), transcript variant 2, mRNA.
Elf1	895.9	962.7	978.5	1.01641	742.3	896.2	1.20733	1136.7	749.4	-1.51681	Mus musculus E74-like factor 1 (Elf1), mRNA.
AI467606	1028.4	486.7	484.9	-1.00371	441.3	468.1	1.06073	941.2	620.7	-1.51635	Mus musculus expressed sequence AI467606 (AI467606), mRNA.
Atp2b1	242.1	246.5	246	-1.00203	365.4	362.9	-1.00689	626.2	413	-1.51622	Mus musculus ATPase, Ca++ transporting, plasma membrane 1 (Atp2b1), mRNA.
1700112C13Rik	68.1	67.5	73	1.08148	81	104.8	1.29383	129.9	85.7	-1.51575	Mus musculus RIKEN cDNA 1700112C13 gene (1700112C13Rik), mRNA.
Zranb3	277.2	303	260.5	-1.16315	244.7	265	1.08296	301.6	199	-1.51558	Mus musculus zinc finger, RAN-binding domain containing 3 (Zranb3), mRNA. XM_896419 XM_896436 XM_912948 XM_922552 XM_922558 XM_922565 XM_922581 XM_922587 XM_922596 XM_974893 XM_974926 XM_974968 XM_975006 XM_975040 XM_975084
Naip2	204	223.3	211.6	-1.05529	205.1	179.2	-1.14453	248.4	164	-1.51463	Mus musculus NLR family, apoptosis inhibitory protein 2 (Naip2), mRNA.
Slc39a14	129.4	132.4	149.3	1.12764	149.9	146.2	-1.02531	251.1	166	-1.51265	Mus musculus solute carrier family 39 (zinc transporter), member 14 (Slc39a14), transcript variant 3, mRNA.
Gtf2f1	285.8	296.4	256.2	-1.15691	310.7	319.4	1.028	482.8	319.2	-1.51253	Mus musculus general transcription factor IIF, polypeptide 1 (Gtf2f1), mRNA.
Cyth4	614.2	559.1	607	1.08567	466.4	526.1	1.128	1072.8	709.3	-1.51248	Mus musculus cytohesin 4 (Cyth4), mRNA.
Clec2d	677.7	817.4	807.9	-1.01176	824.6	1017.3	1.23369	1975.4	1306.1	-1.51244	Mus musculus C-type lectin domain family 2, member d (Clec2d), mRNA.
Sertad1	415.3	880	917.4	1.0425	779.8	1185.7	1.52052	1077.4	712.4	-1.51235	Mus musculus SERTA domain containing 1 (Sertad1), mRNA.
Zfp592	199.6	221.8	221.9	1.00045	173	155.2	-1.11469	222.9	147.4	-1.51221	Mus musculus zinc finger protein 592 (Zfp592), mRNA.
Jak2	207.7	217.9	217.1	-1.00368	526.7	543.2	1.03133	961.7	636	-1.51211	Mus musculus Janus kinase 2 (Jak2), transcript variant 2, mRNA.
Asb13	271.5	285.4	279.9	-1.01965	206.2	237.3	1.15082	323.8	214.2	-1.51167	Mus musculus ankyrin repeat and SOCS box-containing 13 (Asb13), mRNA.
Atxn1	137.1	141.1	133.7	-1.05535	155.8	135.9	-1.14643	250.8	166.1	-1.50993	Mus musculus ataxin 1 (Atxn1), mRNA.
Isg20	559.5	637.4	607.2	-1.04974	727.5	907.8	1.24784	1598.7	1060.6	-1.50735	Mus musculus interferon-stimulated protein (Isg20), mRNA.
Zfp12	274.8	210	203.4	-1.03245	153.1	167.3	1.09275	283.5	188.2	-1.50638	Mus musculus zinc finger protein 12 (Zfp12), mRNA.
Dhrs9	138.2	153	147.1	-1.04011	181.9	236.5	1.30016	237.7	157.8	-1.50634
Tesk1	284.6	269	302.8	1.12565	351.1	357.2	1.01737	573	380.9	-1.50433	Mus musculus testis specific protein kinase 1 (Tesk1), mRNA.
Parp3	108.5	108.1	104.7	-1.03247	106.8	110	1.02996	163.8	109	-1.50275	Mus musculus poly (ADP-ribose) polymerase family, member 3 (Parp3), mRNA.
A830007P12Rik	636.2	514.4	434.2	-1.18471	321	331.6	1.03302	480.6	319.9	-1.50234	Mus musculus RIKEN cDNA A830007P12 gene (A830007P12Rik), mRNA.
Tnip2	164.2	150.7	171.2	1.13603	162	151.1	-1.07214	259.5	173.3	-1.4974	Mus musculus TNFAIP3 interacting protein 2 (Tnip2), mRNA.
Amigo3	97.8	123.1	108.7	-1.13247	80.8	96.7	1.19678	151.5	101.2	-1.49704	Mus musculus adhesion molecule with Ig like domain 3 (Amigo3), mRNA.
Rab7l1	542.1	506.3	531.5	1.04977	502.1	523.3	1.04222	892	595.9	-1.4969	Mus musculus RAB7, member RAS oncogene family-like 1 (Rab7l1), mRNA.
Eng	93.7	91.1	92.3	1.01317	88.5	99.4	1.12316	152.4	101.9	-1.49558	Mus musculus endoglin (Eng), mRNA.
Nub1	844.7	862.1	856.3	-1.00677	776.8	890.1	1.14585	950.8	636.3	-1.49426	Mus musculus negative regulator of ubiquitin-like proteins 1 (Nub1), mRNA.
Ccdc23	813.6	827.1	854.6	1.03325	859.8	858	-1.0021	1666.5	1116.1	-1.49315	Mus musculus coiled-coil domain containing 23 (Ccdc23), transcript variant 1, mRNA.
Lgals9	1438.5	1516.6	1532.9	1.01075	1681.2	1842.9	1.09618	2923.3	1958.2	-1.49285	Mus musculus lectin, galactose binding, soluble 9 (Lgals9), mRNA.
Ccdc86	2981	2833.1	2964.9	1.04652	2685.9	2641.7	-1.01673	4297.3	2883.7	-1.4902	Mus musculus coiled-coil domain containing 86 (Ccdc86), mRNA.
Samd9l	5784.6	5324.3	5202.6	-1.02339	4808.9	5659.2	1.17682	8060	5412.8	-1.48906	PREDICTED: Mus musculus sterile alpha motif domain containing 9-like, transcript variant 1 (Samd9l), mRNA.
2610208M17Rik	1155.8	1020.9	1050.7	1.02919	1073.6	1053.5	-1.01908	1602.3	1076.5	-1.48843	Mus musculus RIKEN cDNA 2610208M17 gene (2610208M17Rik), mRNA.
Maea	314.1	315.5	292.6	-1.07826	276.1	280	1.01413	404.3	271.9	-1.48694	Mus musculus macrophage erythroblast attacher (Maea), mRNA.
Zbtb45	181.8	177.6	173.4	-1.02422	122	117.8	-1.03565	190.6	128.3	-1.48558	Mus musculus zinc finger and BTB domain containing 45 (Zbtb45), mRNA.
Mmp9	84.8	90.5	85.5	-1.05848	111.3	116.8	1.04942	199.6	134.4	-1.48512	Mus musculus matrix metallopeptidase 9 (Mmp9), mRNA.
Edn1	80.8	80.7	81.9	1.01487	403	553.9	1.37444	2387.5	1607.8	-1.48495	Mus musculus endothelin 1 (Edn1), mRNA.
Rabl5	445.6	453.8	405.9	-1.11801	421	431.8	1.02565	727.5	490.5	-1.48318
Pldn	1011.4	1096.4	983.8	-1.11445	1032.8	1002.5	-1.03022	1528.3	1032.8	-1.47976	Mus musculus pallidin (Pldn), mRNA.
Mafk	93.2	112.7	104.1	-1.08261	93.3	113.5	1.21651	150.9	102	-1.47941	Mus musculus v-maf musculoaponeurotic fibrosarcoma oncogene family, protein K (avian) (Mafk), mRNA.
2010002N04Rik	100.4	116	114.6	-1.01222	227.5	217.7	-1.04502	349.9	236.7	-1.47824	Mus musculus RIKEN cDNA 2010002N04 gene (2010002N04Rik), mRNA.
Tpbg	71.6	77.2	78.4	1.01554	246.2	334.9	1.36028	534	361.3	-1.478	Mus musculus trophoblast glycoprotein (Tpbg), mRNA.
Fmnl1	131.7	128.4	137.1	1.06776	138.4	127.9	-1.0821	204.2	138.2	-1.47757	Mus musculus formin-like 1 (Fmnl1), transcript variant 1, mRNA.
Gypc	188	207	202.9	-1.02021	325.3	251	-1.29602	839.7	568.7	-1.47653	Mus musculus glycophorin C (Gypc), mRNA.
Letmd1	238.2	223.4	227.3	1.01746	179.7	186.1	1.03561	258.8	175.5	-1.47464	Mus musculus LETM1 domain containing 1 (Letmd1), mRNA.
Casp4	477.9	488.5	515.9	1.05609	755.1	833.7	1.10409	1368.3	927.9	-1.47462	Mus musculus caspase 4, apoptosis-related cysteine peptidase (Casp4), mRNA.
Pdgfa	577.6	584	544.7	-1.07215	1180	1377.3	1.1672	2584.6	1753.4	-1.47405
Il15ra	97.5	104.7	107.3	1.02483	140.6	137.8	-1.02032	287.1	194.9	-1.47306	Mus musculus interleukin 15 receptor, alpha chain (Il15ra), transcript variant 1, mRNA.
Blcap	461.8	440.3	408.3	-1.07837	958.4	1306.1	1.36279	1318.9	896.2	-1.47166	Mus musculus bladder cancer associated protein homolog (human) (Blcap), mRNA.
Apaf1	399.2	425.3	409	-1.03985	313.7	316.2	1.00797	447.2	304.2	-1.47009	Mus musculus apoptotic peptidase activating factor 1 (Apaf1), transcript variant 1, mRNA.
Cdyl2	96.3	96.1	98.7	1.02706	101.7	127.7	1.25565	191	130	-1.46923	Mus musculus chromodomain protein, Y chromosome-like 2 (Cdyl2), mRNA.
Tapbp	494.1	614	590	-1.04068	647.2	683.2	1.05562	1123.2	765	-1.46824
Tgtp	77.5	82.1	73.7	-1.11398	77.8	89.9	1.15553	114	77.7	-1.46718	Mus musculus T-cell specific GTPase (Tgtp), mRNA.
Mov10	146	143.8	149.1	1.03686	139.7	159.1	1.13887	233.7	159.4	-1.46612	Mus musculus Moloney leukemia virus 10 (Mov10), mRNA.
Cmtm6	495	393.5	395.5	1.00508	259.1	285.4	1.10151	326.8	223	-1.46547	Mus musculus CKLF-like MARVEL transmembrane domain containing 6 (Cmtm6), mRNA.
Aim2	317.9	321	314.4	-1.02099	290.5	259.5	-1.11946	513.2	350.4	-1.46461	Mus musculus absent in melanoma 2 (Aim2), mRNA.
Snx30	498.7	523.6	536.2	1.02406	311	375.4	1.20707	327.1	223.5	-1.46353	Mus musculus sorting nexin family member 30 (Snx30), mRNA.
Ythdf1	870.6	907	884	-1.02602	715.5	819.6	1.14549	1053.3	720	-1.46292	Mus musculus YTH domain family 1 (Ythdf1), mRNA.
Nfkb1	1217.8	1273.7	1337	1.0497	2479.2	3028.4	1.22152	4586.1	3135.1	-1.46282	Mus musculus nuclear factor of kappa light polypeptide gene enhancer in B-cells 1, p105 (Nfkb1), mRNA.
Trim41	525.4	481.7	500.9	1.03986	309.9	342.1	1.1039	480.5	328.7	-1.46182
Bcat1	1756.3	1602.7	1552.2	-1.03253	1019.5	1141.3	1.11947	1337	914.8	-1.46152	Mus musculus branched chain aminotransferase 1, cytosolic (Bcat1), transcript variant 2, mRNA.
Slc11a1	1282.6	1221.1	1293.7	1.05945	1438.7	1701.4	1.1826	2698.3	1847.5	-1.46051	Mus musculus solute carrier family 11 (proton-coupled divalent metal ion transporters), member 1 (Slc11a1), mRNA.
LOC100046406	118.9	127.4	146.3	1.14835	110	126.7	1.15182	164	112.3	-1.46037	PREDICTED: Mus musculus hypothetical protein LOC100046406 (LOC100046406), mRNA.
Pmm2	315.4	314.6	318.6	1.01271	298.3	368.4	1.235	413.3	283.1	-1.45991
Car4	67.6	75.3	71	-1.06056	66.6	66.6	1	115.9	79.5	-1.45786	Mus musculus carbonic anhydrase 4 (Car4), mRNA.
Cln3	1911.7	1670.2	1602.7	-1.04212	2156.6	2152.5	-1.0019	4063.8	2790.1	-1.45651	Mus musculus ceroid lipofuscinosis, neuronal 3, juvenile (Batten, Spielmeyer-Vogt disease) (Cln3), mRNA.
Agpat4	573.5	571.9	554.1	-1.03212	1120.8	1456.3	1.29934	1833.4	1259	-1.45624	Mus musculus 1-acylglycerol-3-phosphate O-acyltransferase 4 (lysophosphatidic acid acyltransferase, delta) (Agpat4), mRNA.
Snap29	620.6	538.6	587.8	1.09135	506.7	549.5	1.08447	707	485.9	-1.45503	Mus musculus synaptosomal-associated protein 29 (Snap29), mRNA.
Wsb2	2244.7	2170.7	2137.6	-1.01548	2202.4	2373.5	1.07769	3158	2170.7	-1.45483	Mus musculus WD repeat and SOCS box-containing 2 (Wsb2), mRNA.
Aftph	2436.1	2408.3	2507.4	1.04115	3097.7	3607.6	1.16461	4608.8	3168.5	-1.45457	Mus musculus aftiphilin (Aftph), mRNA.
BC003236	982.4	1270.9	1272.6	1.00134	963.1	994.3	1.0324	1400.3	962.7	-1.45455
Casp2	2189.5	1903.7	1877.9	-1.01374	1206.6	1132.8	-1.06515	1935.7	1331.3	-1.45399	Mus musculus caspase 2 (Casp2), mRNA.
Gadd45g	270.2	651.8	609.1	-1.0701	552.3	742.2	1.34383	850.4	584.9	-1.45392	Mus musculus growth arrest and DNA-damage-inducible 45 gamma (Gadd45g), mRNA.
B230312A22Rik	140.6	146.2	138.2	-1.05789	179.2	192.1	1.07199	245.3	169	-1.45148	Mus musculus RIKEN cDNA B230312A22 gene (B230312A22Rik), mRNA.
Ugcg	735.8	712.8	745.6	1.04602	950.8	1232.7	1.29649	1271.8	877.4	-1.44951	Mus musculus UDP-glucose ceramide glucosyltransferase (Ugcg), mRNA.
Prmt2	1130.4	1079.7	1099.8	1.01862	910	919.9	1.01088	1319.4	910.4	-1.44925	Mus musculus protein arginine N-methyltransferase 2 (Prmt2), transcript variant 2, mRNA.
Oraov1	260.6	170.1	169.4	-1.00413	188.1	220.7	1.17331	302.3	208.6	-1.44919	Mus musculus oral cancer overexpressed 1 (Oraov1), mRNA.
Pik3cd	160.2	156.5	159.1	1.01661	138.6	144.2	1.0404	213	147	-1.44898	Mus musculus phosphatidylinositol 3-kinase catalytic delta polypeptide (Pik3cd), transcript variant 1, mRNA.
Gpatch4	392.5	367.5	346.8	-1.05969	393.3	386.7	-1.01707	527.8	365.4	-1.44444	Mus musculus G patch domain containing 4 (Gpatch4), mRNA.
Mobkl2c	84.1	85.6	79.8	-1.07268	92.1	91.9	-1.00218	130	90.1	-1.44284	Mus musculus MOB1, Mps One Binder kinase activator-like 2C (yeast) (Mobkl2c), mRNA.
C3	118.5	126.5	118.9	-1.06392	148.1	174.3	1.17691	231.2	160.4	-1.4414
Cyp4v3	247.2	270.6	258.9	-1.04519	271.1	320	1.18038	373.6	259.3	-1.4408	Mus musculus cytochrome P450, family 4, subfamily v, polypeptide 3 (Cyp4v3), mRNA.
Psmb10	4004.7	3835	3962	1.03312	3818.8	4133.6	1.08243	6630.1	4604.3	-1.43998	Mus musculus proteasome (prosome, macropain) subunit, beta type 10 (Psmb10), mRNA.
Setd4	162.3	178.9	187.8	1.04975	211.9	238.4	1.12506	323.5	224.8	-1.43906	Mus musculus SET domain containing 4 (Setd4), mRNA.
Hsp105	2119.2	2187.3	2179.9	-1.00339	2033.5	2059.5	1.01279	2301.2	1601.9	-1.43654
Diap1	175.4	181.4	172.4	-1.0522	200.5	187.9	-1.06706	260.2	181.3	-1.43519	Mus musculus diaphanous homolog 1 (Drosophila) (Diap1), mRNA.
Siglec1	516.6	454.1	507.1	1.11671	446.8	446	-1.00179	654.7	456.4	-1.43449	Mus musculus sialic acid binding Ig-like lectin 1, sialoadhesin (Siglec1), mRNA.
Arhgap22	86.4	93.1	94.5	1.01504	97.6	94.1	-1.03719	250.7	174.8	-1.43421	Mus musculus Rho GTPase activating protein 22 (Arhgap22), mRNA.
Dhx58	1824	1692.1	1739.8	1.02819	1805.8	1882.8	1.04264	2863.9	1997.4	-1.43381	Mus musculus DEXH (Asp-Glu-X-His) box polypeptide 58 (Dhx58), mRNA.
Rnf214	226.4	243.4	220.5	-1.10385	214.2	242.4	1.13165	255.4	178.2	-1.43322	Mus musculus ring finger protein 214 (Rnf214), mRNA.
Plaur	469.3	676.1	609.6	-1.10909	1653	2112.5	1.27798	2725.3	1902.1	-1.43278	Mus musculus plasminogen activator, urokinase receptor (Plaur), mRNA.
Tmem127	399.3	360.4	359.1	-1.00362	360.8	378.1	1.04795	476.6	332.7	-1.43252	Mus musculus transmembrane protein 127 (Tmem127), mRNA.
Rnpep	1920.2	1962.2	1920.2	-1.02187	1647.4	1671	1.01433	2327.6	1625.4	-1.43202	Mus musculus arginyl aminopeptidase (aminopeptidase B) (Rnpep), mRNA.
Plekha4	91.3	92.3	91.6	-1.00764	106.1	110.1	1.0377	168	117.4	-1.43101	Mus musculus pleckstrin homology domain containing, family A (phosphoinositide binding specific) member 4 (Plekha4), mRNA.
Apobec1	4097.2	3614.2	3682.5	1.0189	1710.3	1653	-1.03466	2862.3	2000.7	-1.43065	Mus musculus apolipoprotein B mRNA editing enzyme, catalytic polypeptide 1 (Apobec1), transcript variant 1, mRNA.
Mmp13	73.9	77.8	73.8	-1.0542	114.2	116.1	1.01664	175.1	122.4	-1.43056	Mus musculus matrix metallopeptidase 13 (Mmp13), mRNA.
Ms4a6d	3850.8	4150.2	3800.8	-1.09193	3607.4	3827.6	1.06104	6506.5	4552.4	-1.42925	Mus musculus membrane-spanning 4-domains, subfamily A, member 6D (Ms4a6d), mRNA.
Slc25a37	272.3	197.9	203.6	1.0288	314	354.1	1.12771	516.1	361.4	-1.42806	Mus musculus solute carrier family 25, member 37 (Slc25a37), nuclear gene encoding mitochondrial protein, mRNA.
Ankrd50	150.4	161.5	166.8	1.03282	170	191.5	1.12647	237.1	166.2	-1.42659	Mus musculus ankrin repeat domain 50 (Ankrd50), mRNA.
Slc15a3	1353.5	1398.8	1549.7	1.10788	3313	3514.1	1.0607	5760.3	4038.4	-1.42638	Mus musculus solute carrier family 15, member 3 (Slc15a3), mRNA.
Vrk2	270	263.5	274.8	1.04288	245.1	271.8	1.10894	427.6	299.8	-1.42628	Mus musculus vaccinia related kinase 2 (Vrk2), mRNA.
5830484A20Rik	356.8	339.3	307.8	-1.10234	519.3	529.3	1.01926	897.6	629.4	-1.42612
LOC100048583	225.4	235.1	266.8	1.13484	294	296.4	1.00816	421.5	295.6	-1.42591	PREDICTED: Mus musculus similar to interferon-inducible protein 203, transcript variant 1 (LOC100048583), mRNA.
Plekhm1	786.3	751.5	732.7	-1.02566	288.7	301.5	1.04434	354.6	248.7	-1.42581	Mus musculus pleckstrin homology domain containing, family M (with RUN domain) member 1 (Plekhm1), mRNA.
A230051G13Rik	245.6	257.4	266	1.03341	240.5	291.7	1.21289	297.1	208.5	-1.42494
Orai1	563.1	577.8	513.8	-1.12456	518.4	456.8	-1.13485	811.8	569.9	-1.42446	Mus musculus ORAI calcium release-activated calcium modulator 1 (Orai1), mRNA.
Kctd10	661.8	660.2	660.4	1.0003	637.8	708.8	1.11132	945.7	664.1	-1.42403	Mus musculus potassium channel tetramerisation domain containing 10 (Kctd10), mRNA.
Tmbim6	5501.4	5941.3	5748.5	-1.03354	5034.9	6015.9	1.19484	7176.6	5042.2	-1.42331	Mus musculus transmembrane BAX inhibitor motif containing 6 (Tmbim6), mRNA.
Fyb	573.2	701	620.9	-1.12901	738.8	709.6	-1.04115	1462.1	1027.4	-1.42311	Mus musculus FYN binding protein (Fyb), mRNA.
AI504432	81.5	75.1	79.1	1.05326	87.9	74.3	-1.18304	110.5	77.7	-1.42214	PREDICTED: Mus musculus expressed sequence AI504432 (AI504432), misc RNA.
Itgb2	245.2	273.4	234.4	-1.16638	325.7	327.8	1.00645	437.8	308	-1.42143	Mus musculus integrin beta 2 (Itgb2), mRNA.
Anpep	137.8	131.2	133.8	1.01982	135.7	160.1	1.17981	200.1	140.8	-1.42116	Mus musculus alanyl (membrane) aminopeptidase (Anpep), mRNA.
Nat2	345.2	329.7	287.9	-1.14519	252.3	261.9	1.03805	563.3	396.6	-1.42032	Mus musculus N-acetyltransferase 2 (arylamine N-acetyltransferase) (Nat2), mRNA.
Adar	548.7	544.1	546.8	1.00496	588.8	605.9	1.02904	1016.6	716.5	-1.41884	Mus musculus adenosine deaminase, RNA-specific (Adar), transcript variant 1, mRNA.
St6galnac4	190.9	182	178.2	-1.02132	233.6	232.4	-1.00516	442.7	312.3	-1.41755	Mus musculus ST6 (alpha-N-acetyl-neuraminyl-2,3-beta-galactosyl-1, 3)-N-acetylgalactosaminide alpha-2,6-sialyltransferase 4 (St6galnac4), mRNA.
Sh3bp5l	1181.6	1181.3	1100.4	-1.07352	831.2	847.2	1.01925	921	650.2	-1.41649	Mus musculus SH3 binding domain protein 5 like (Sh3bp5l), mRNA.
Sdc1	80.5	86.2	78.6	-1.09669	101.1	128.6	1.27201	133	93.9	-1.4164	Mus musculus syndecan 1 (Sdc1), mRNA.
Ankfy1	953.3	918	899.7	-1.02034	750.6	846	1.1271	1076.3	760.4	-1.41544	Mus musculus ankyrin repeat and FYVE domain containing 1 (Ankfy1), mRNA.
Socs1	88.1	89.7	88.7	-1.01127	92.6	77.6	-1.1933	133.9	94.6	-1.41543	Mus musculus suppressor of cytokine signaling 1 (Socs1), mRNA.
Il1a	67.6	92.8	81.2	-1.14286	717.3	777.1	1.08337	2427.2	1716.6	-1.41396
Slc6a8	133.1	130.2	135.3	1.03917	153.7	232.8	1.51464	181.5	128.4	-1.41355	Mus musculus solute carrier family 6 (neurotransmitter transporter, creatine), member 8 (Slc6a8), mRNA.
Zfp382	128.2	138.2	125.1	-1.10472	182.4	165.8	-1.10012	223	157.8	-1.41318	Mus musculus zinc finger protein 382 (Zfp382), mRNA.
LOC235497	90.2	94.7	91.8	-1.03159	79.7	73.8	-1.07995	113.9	80.6	-1.41315
Popdc2	70.1	71.4	69.8	-1.02292	71.7	83.8	1.16876	103.1	73	-1.41233	Mus musculus popeye domain containing 2 (Popdc2), transcript variant 2, mRNA.
Gp49a	400	466.4	446.1	-1.04551	1054.9	1291.8	1.22457	1992.5	1411.3	-1.41182	Mus musculus glycoprotein 49 A (Gp49a), mRNA.
Ptgir	129.2	116.5	114.7	-1.01569	106.7	102.5	-1.04098	176.7	125.2	-1.41134	Mus musculus prostaglandin I receptor (IP) (Ptgir), mRNA.
Mtif3	258	191.9	204	1.06305	199.8	188.8	-1.05826	308.6	218.7	-1.41107	Mus musculus mitochondrial translational initiation factor 3 (Mtif3), nuclear gene encoding mitochondrial protein, mRNA.
Pgam2	74.3	76.1	73	-1.04247	72.6	70.1	-1.03566	85.6	60.7	-1.41021	Mus musculus phosphoglycerate mutase 2 (Pgam2), mRNA.
Pxn	162.1	169.9	154.3	-1.1011	194	225.6	1.16289	292.9	207.7	-1.41021	Mus musculus paxillin (Pxn), transcript variant alpha, mRNA.
Zfp637	454.6	448.3	446.3	-1.00448	269.9	244.6	-1.10343	482	341.9	-1.40977	Mus musculus zinc finger protein 637 (Zfp637), mRNA.
1200015F23Rik	217.8	217.1	221.2	1.01889	225.1	227.3	1.00977	407.1	288.8	-1.40963	Mus musculus RIKEN cDNA 1200015F23 gene (1200015F23Rik), mRNA. XM_924991
Taf15	818.9	547	869.1	1.58885	772.3	870.5	1.12715	937.4	665.2	-1.4092	Mus musculus TAF15 RNA polymerase II, TATA box binding protein (TBP)-associated factor (Taf15), mRNA.
1500031L02Rik	629.5	598.5	615.8	1.02891	367.3	350.8	-1.04704	591	419.4	-1.40916	Mus musculus RIKEN cDNA 1500031L02 gene (1500031L02Rik), mRNA.
Cplx4	76.8	71.9	73.1	1.01669	84.8	80.2	-1.05736	92.4	65.6	-1.40854	Mus musculus complexin 4 (Cplx4), mRNA.
Parp12	1662.8	1680.5	1724.3	1.02606	1816.2	1781.4	-1.01954	2513.5	1784.8	-1.40828	Mus musculus poly (ADP-ribose) polymerase family, member 12 (Parp12), mRNA.
Cpsf4	189.6	190.7	218.3	1.14473	144.6	149.6	1.03458	196.7	139.7	-1.40802	Mus musculus cleavage and polyadenylation specific factor 4 (Cpsf4), mRNA.
Eya3	132.4	143.5	130.1	-1.103	144.5	160.3	1.10934	225.1	159.9	-1.40775	Mus musculus eyes absent 3 homolog (Drosophila) (Eya3), transcript variant 2, mRNA.
Tcf4	1337.6	1253.3	1248.1	-1.00417	836.6	954	1.14033	1173.8	834.8	-1.40609	Mus musculus transcription factor 4 (Tcf4), transcript variant 1, mRNA.
Trim11	133.9	132.9	130.5	-1.01839	87.7	90.6	1.03307	170.4	121.2	-1.40594	Mus musculus tripartite motif-containing 11 (Trim11), mRNA.
Cdc2l5	373.6	395.5	362.2	-1.09194	358.7	405.7	1.13103	403.5	287	-1.40592	Mus musculus cell division cycle 2-like 5 (cholinesterase-related cell division controller) (Cdc2l5), mRNA.
Ush3a	77.6	77.8	89.9	1.15553	82.8	76.2	-1.08661	98.1	69.8	-1.40544
Xylt2	133.8	117.7	129.1	1.09686	141.6	155.1	1.09534	403	286.9	-1.40467	Mus musculus xylosyltransferase II (Xylt2), mRNA.
LOC100046003	532.7	560.1	540.2	-1.03684	373.6	419.5	1.12286	541.6	385.7	-1.4042	PREDICTED: Mus musculus similar to tripartite motif-containing 41 (LOC100046003), mRNA.
Clcn7	189.1	161.6	192.1	1.18874	165.4	223.3	1.35006	267.6	190.6	-1.40399	Mus musculus chloride channel 7 (Clcn7), mRNA.
Zfp313	714.4	700.2	636.2	-1.1006	660	676.4	1.02485	1073.5	765.1	-1.40308
Vim	4976.2	5412.8	5666.4	1.04685	5478.4	6925	1.26406	7612.3	5427.5	-1.40254	Mus musculus vimentin (Vim), mRNA.
Vps37c	131.8	135.3	153.1	1.13156	162.2	182.4	1.12454	199	141.9	-1.4024	Mus musculus vacuolar protein sorting 37C (yeast) (Vps37c), mRNA.
Rnf114	1061.6	941.8	982.4	1.04311	921.5	904.5	-1.01879	1542	1099.6	-1.40233	Mus musculus ring finger protein 114 (Rnf114), mRNA.
Limd1	514.1	459.2	514.4	1.12021	460.6	425.9	-1.08147	629.6	449.2	-1.4016	Mus musculus LIM domains containing 1 (Limd1), mRNA.
Top3a	114.4	115.2	109.5	-1.05205	91.3	100	1.09529	123.9	88.4	-1.40158	Mus musculus topoisomerase (DNA) III alpha (Top3a), mRNA.
LOC100047934	3933.3	3921.3	4095.7	1.04448	1951.6	1869.6	-1.04386	4128.7	2945.9	-1.40151	PREDICTED: Mus musculus hypothetical protein LOC100047934 (LOC100047934), mRNA.
Pcsk7	841.4	771.3	792.7	1.02775	773.9	809.5	1.046	1034.8	738.4	-1.40141	Mus musculus proprotein convertase subtilisin/kexin type 7 (Pcsk7), mRNA.
Lasp1	2612.7	2573.5	2416.6	-1.06493	2840.2	3396.6	1.1959	4423.7	3157.4	-1.40106	Mus musculus LIM and SH3 protein 1 (Lasp1), mRNA.
Cd44	165.8	172.2	160.9	-1.07023	235.8	301.6	1.27905	344	245.6	-1.40065	Mus musculus CD44 antigen (Cd44), transcript variant 2, mRNA.
Gna13	1989.2	1607.8	1597.8	-1.00626	1881.2	2357.5	1.25319	3185	2276.4	-1.39914
Ccrk	172.1	149.7	154.5	1.03206	121.2	121.2	1	179.9	128.6	-1.39891	Mus musculus cell cycle related kinase (Ccrk), mRNA.
Hk3	900.6	854.2	889.9	1.04179	930.6	1056	1.13475	1265.8	905.1	-1.39852	Mus musculus hexokinase 3 (Hk3), nuclear gene encoding mitochondrial protein, mRNA.
Ifi205	89.5	83.1	93.2	1.12154	92.6	104.4	1.12743	142.6	102	-1.39804	Mus musculus interferon activated gene 205 (Ifi205), mRNA.
Myo10	91.2	90	92.3	1.02556	96.2	113.1	1.17568	173.6	124.2	-1.39775	Mus musculus myosin X (Myo10), mRNA.
Mad2l1bp	362.3	315.4	308.9	-1.02104	229.6	234.2	1.02003	340.8	244.3	-1.39501	Mus musculus MAD2L1 binding protein (Mad2l1bp), mRNA.
Slc7a11	217.9	226.6	203	-1.11626	411.4	550.4	1.33787	675.8	484.5	-1.39484	Mus musculus solute carrier family 7 (cationic amino acid transporter, y+ system), member 11 (Slc7a11), mRNA.
Slc31a2	145.2	153.3	158.3	1.03262	224.1	259.3	1.15707	492.5	353.3	-1.394
Prkg2	87.4	87.2	82.6	-1.05569	136.2	197.1	1.44714	203.1	145.7	-1.39396	Mus musculus protein kinase, cGMP-dependent, type II (Prkg2), mRNA.
Stau1	313.3	308.7	340.3	1.10236	321.6	325.9	1.01337	460	330	-1.39394	Mus musculus staufen (RNA binding protein) homolog 1 (Drosophila) (Stau1), mRNA.
LOC100046781	103.6	101.2	100.3	-1.00897	150.9	147.9	-1.02028	250.8	180	-1.39333	PREDICTED: Mus musculus similar to carboxypeptidase D (LOC100046781), mRNA.
Arfgap1	202.8	192.2	187.8	-1.02343	162.9	160.9	-1.01243	242.1	173.8	-1.39298	Mus musculus ADP-ribosylation factor GTPase activating protein 1 (Arfgap1), mRNA.
Dcp1a	198	188.5	184.4	-1.02223	198.6	204.2	1.0282	286.8	205.9	-1.39291	Mus musculus DCP1 decapping enzyme homolog A (S. cerevisiae) (Dcp1a), mRNA.
Sgpl1	334.8	318.6	331.8	1.04143	329.4	393	1.19308	412	295.8	-1.39283	Mus musculus sphingosine phosphate lyase 1 (Sgpl1), mRNA.
6330442E10Rik	488.2	483.1	504	1.04326	584.7	744.4	1.27313	667.4	479.2	-1.39274	Mus musculus RIKEN cDNA 6330442E10 gene (6330442E10Rik), mRNA.
Tgfb1	603.4	558.5	571.6	1.02346	832.9	849.4	1.01981	1365.9	981	-1.39235	Mus musculus transforming growth factor, beta 1 (Tgfb1), mRNA.
Nfix	204	214.1	206.8	-1.0353	189.2	202.2	1.06871	239.3	171.9	-1.39209	Mus musculus nuclear factor I/X (Nfix), transcript variant 2, mRNA. XM_921228 XM_921240 XM_921250 XM_921261 XM_921270 XM_921288 XM_921293 XM_921299 XM_921300 XM_921307
Tra2a	3157.5	3118.2	3177.8	1.01911	3323.1	4024.6	1.2111	4467.1	3210.1	-1.39158	Mus musculus transformer 2 alpha homolog (Drosophila) (Tra2a), mRNA.
Clec5a	773.1	820.2	739.4	-1.10928	742.8	996.9	1.34208	1215	873.7	-1.39064	Mus musculus C-type lectin domain family 5, member a (Clec5a), transcript variant 1, mRNA.
Trim16	106.1	116.1	104.7	-1.10888	91.9	96.3	1.04788	117.4	84.5	-1.38935	Mus musculus tripartite motif-containing 16 (Trim16), mRNA.
Apobec3	116.8	120	115.3	-1.04076	101.3	107.3	1.05923	176.3	127	-1.38819	Mus musculus apolipoprotein B mRNA editing enzyme, catalytic polypeptide 3 (Apobec3), mRNA.
Csf2ra	998.2	1011.6	1051.5	1.03944	1122.9	1094.9	-1.02557	1602.7	1154.8	-1.38786	Mus musculus colony stimulating factor 2 receptor, alpha, low-affinity (granulocyte-macrophage) (Csf2ra), mRNA.
Mfsd7a	118.8	123.3	126.1	1.02271	121	112.8	-1.0727	174.5	125.8	-1.38712	Mus musculus major facilitator superfamily domain containing 7A (Mfsd7a), mRNA.
Irgm1	5391.4	5370.2	5515	1.02696	5736.2	7014.6	1.22287	8019	5784	-1.38641	Mus musculus immunity-related GTPase family M member 1 (Irgm1), mRNA.
Endogl1	147.3	126.8	125.4	-1.01116	102	104.5	1.02451	146.3	105.6	-1.38542	Mus musculus endonuclease G-like 1 (Endogl1), mRNA.
Pik3ap1	125.8	115.7	128.8	1.11322	108.4	122.1	1.12638	182.3	131.6	-1.38526	Mus musculus phosphoinositide-3-kinase adaptor protein 1 (Pik3ap1), mRNA.
Acvr1	284.9	318.1	295.4	-1.07684	228.3	243.4	1.06614	342.5	247.3	-1.38496	Mus musculus activin A receptor, type 1 (Acvr1), mRNA.
Cish	83.7	104.5	97.5	-1.07179	1013.8	1234.6	1.21779	2581.5	1864.8	-1.38433	Mus musculus cytokine inducible SH2-containing protein (Cish), mRNA.
Sart1	193.5	202.7	194.9	-1.04002	158.2	172.9	1.09292	220.6	159.5	-1.38307	Mus musculus squamous cell carcinoma antigen recognized by T-cells 1 (Sart1), mRNA.
AI837181	345.3	363.4	313.6	-1.1588	272.4	276	1.01322	451.7	326.7	-1.38261	Mus musculus expressed sequence AI837181 (AI837181), mRNA.
Pcgf5	2399	2710.3	2789.6	1.02926	2607.8	2799.4	1.07347	3667.6	2654.3	-1.38176	Mus musculus polycomb group ring finger 5 (Pcgf5), mRNA.
Ube1l	3560.5	3470.5	3295.1	-1.05323	3181.7	3341.6	1.05026	4751.1	3439.4	-1.38137	Mus musculus ubiquitin-activating enzyme E1-like (Ube1l), mRNA.
Mbc2	1452.2	1408.3	1526.5	1.08393	1364.8	1400.3	1.02601	1754.5	1270.3	-1.38117	Mus musculus membrane bound C2 domain containing protein (Mbc2), mRNA.
Aim1	528.4	576.3	576.6	1.00052	498.6	577	1.15724	603.2	437.3	-1.37937
Ifi204	91.3	98.8	96.2	-1.02703	110.6	103.6	-1.06757	148.9	108	-1.3787	Mus musculus interferon activated gene 204 (Ifi204), mRNA.
Slamf8	96.5	98.4	94.5	-1.04127	102.4	93.9	-1.09052	143.6	104.2	-1.37812
Itgb7	114.5	112	112	1	107.6	121.9	1.1329	157.5	114.3	-1.37795	Mus musculus integrin beta 7 (Itgb7), mRNA.
Ubap1	280.3	321.5	282.8	-1.13685	339.2	388.9	1.14652	398.9	289.6	-1.37742	Mus musculus ubiquitin-associated protein 1 (Ubap1), mRNA.
Frag1	302.3	293.6	302.2	1.02929	298.9	313.9	1.05018	549.8	399.3	-1.37691	Mus musculus FGF receptor activating protein 1 (Frag1), mRNA.
Fbxo46	142.1	131.8	141	1.0698	147.1	135.7	-1.08401	164.4	119.4	-1.37688	Mus musculus F-box protein 46 (Fbxo46), mRNA.
S100a8	81.5	80	77.9	-1.02696	79.1	79	-1.00127	104.5	75.9	-1.37681	Mus musculus S100 calcium binding protein A8 (calgranulin A) (S100a8), mRNA.
Ttc30a2	71.1	77.5	64.8	-1.19599	73.2	66.2	-1.10574	81.5	59.2	-1.37669	Mus musculus tetratricopeptide repeat domain 30A2 (Ttc30a2), mRNA.
Cwf19l2	297	285.4	308.1	1.07954	301.1	259.8	-1.15897	463.6	336.8	-1.37648	Mus musculus CWF19-like 2, cell cycle control (S. pombe) (Cwf19l2), mRNA.
Nkiras2	679.2	634	637.6	1.00568	349.6	331.7	-1.05396	608.3	442.1	-1.37593	Mus musculus NFKB inhibitor interacting Ras-like protein 2 (Nkiras2), mRNA.
Gtf2a1	107.1	113.7	111.9	-1.01609	115.5	142.2	1.23117	152.4	110.8	-1.37545	Mus musculus general transcription factor II A, 1 (Gtf2a1), transcript variant 1, mRNA.
Hsbp1	959.7	792	763.2	-1.03774	620.7	598.5	-1.03709	908.2	660.3	-1.37544	Mus musculus heat shock factor binding protein 1 (Hsbp1), mRNA.
Tlr4	275	238.3	271.6	1.13974	161.8	151.9	-1.06517	185.4	134.8	-1.37537	Mus musculus toll-like receptor 4 (Tlr4), mRNA.
Lamc1	361.2	367.1	363.1	-1.01102	439.2	415.3	-1.05755	648	471.5	-1.37434	Mus musculus laminin, gamma 1 (Lamc1), mRNA.
Epb7.2	172.1	155	142.1	-1.09078	139	139.1	1.00072	160.1	116.5	-1.37425
Gnal1	171.5	171.4	174.4	1.0175	131.5	153.3	1.16578	188.1	136.9	-1.374	Mus musculus guanine nucleotide binding protein-like 1 (Gnal1), mRNA.
Nupr1	2012.4	1561.1	1472.1	-1.06046	2712.6	1945.5	-1.39429	7568.4	5508.6	-1.37392	Mus musculus nuclear protein 1 (Nupr1), mRNA.
Atm	166.8	153.4	149	-1.02953	147.3	153	1.0387	206.5	150.3	-1.37392	Mus musculus ataxia telangiectasia mutated homolog (human) (Atm), mRNA.
Minpp1	125.8	115.3	123	1.06678	119.8	119	-1.00672	183.6	133.7	-1.37322	Mus musculus multiple inositol polyphosphate histidine phosphatase 1 (Minpp1), mRNA.
Por	253.5	266.2	260.7	-1.0211	361.7	466.6	1.29002	543.8	396.2	-1.37254	Mus musculus P450 (cytochrome) oxidoreductase (Por), mRNA.
F10	83.6	86.9	78.8	-1.10279	88.8	88.1	-1.00795	127.6	93	-1.37204
Ankrd13a	621.8	612.2	578.1	-1.05899	584	655.5	1.12243	684.7	499.2	-1.37159	Mus musculus ankyrin repeat domain 13a (Ankrd13a), mRNA.
2310003C23Rik	704.7	670.8	675.8	1.00745	610.8	606.1	-1.00775	890.4	649.2	-1.37153	Mus musculus RIKEN cDNA 2310003C23 gene (2310003C23Rik), mRNA.
Atp6v0a1	251.8	239.6	247.2	1.03172	280.8	361	1.28561	352.6	257.1	-1.37145
Zfp91-cntf	308.5	294.9	263.8	-1.11789	282.5	307.2	1.08743	392.4	286.5	-1.36963	Mus musculus zinc finger protein 91, ciliary neurotrophic factor transcription unit (Zfp91-cntf), mRNA.
Tirap	191.3	171.5	172.5	1.00583	186.4	166.3	-1.12087	332.1	242.5	-1.36948	Mus musculus toll-interleukin 1 receptor (TIR) domain-containing adaptor protein (Tirap), mRNA.
Rusc2	484.9	605.2	621.9	1.02759	350.1	519.2	1.483	401.2	293.1	-1.36882	Mus musculus RUN and SH3 domain containing 2 (Rusc2), transcript variant 1, mRNA.
Trim35	110.4	95.1	113.9	1.19769	99	101.8	1.02828	122.2	89.3	-1.36842
Gm1040	91.6	97.7	88.7	-1.10147	98.1	84.5	-1.16095	104.8	76.6	-1.36815	Mus musculus gene model 1040, (NCBI) (Gm1040), mRNA.
2700055A20Rik	1110.3	1267.4	1132.5	-1.11912	1234.6	1404.8	1.13786	1739.8	1271.8	-1.36798
Pes1	173.3	181	179.3	-1.00948	134.2	176.5	1.3152	174.2	127.4	-1.36735	Mus musculus pescadillo homolog 1, containing BRCT domain (zebrafish) (Pes1), mRNA.
Klk1b16	73.2	69.6	80	1.14943	67.5	64.6	-1.04489	79.3	58	-1.36724	Mus musculus kallikrein 1-related peptidase b16 (Klk1b16), mRNA.
Ch25h	65.6	69.2	76.6	1.10694	73.7	68.1	-1.08223	139	101.7	-1.36676	Mus musculus cholesterol 25-hydroxylase (Ch25h), mRNA.
Ehd2	97.1	93	99.7	1.07204	105.9	102.2	-1.0362	143.6	105.1	-1.36632	Mus musculus EH-domain containing 2 (Ehd2), mRNA.
Rbm5	952.1	871	858.4	-1.01468	668.1	844	1.26328	912	667.7	-1.36588	Mus musculus RNA binding motif protein 5 (Rbm5), mRNA.
Lig4	93.5	91.6	93.2	1.01747	99.2	100.3	1.01109	110.2	80.7	-1.36555	Mus musculus ligase IV, DNA, ATP-dependent (Lig4), mRNA.
Trpv2	873.6	866.9	847.9	-1.02241	787.9	814.3	1.03351	1024.4	750.2	-1.3655	Mus musculus transient receptor potential cation channel, subfamily V, member 2 (Trpv2), mRNA.
Grina	5327.3	5142.9	5220.8	1.01515	4909.4	4966.3	1.01159	6477.7	4744	-1.36545	Mus musculus glutamate receptor, ionotropic, N-methyl D-aspartate-associated protein 1 (glutamate binding) (Grina), mRNA.
Zbtb5	253.9	210.9	210.1	-1.00381	234.7	196.6	-1.19379	358.6	262.7	-1.36506	Mus musculus zinc finger and BTB domain containing 5 (Zbtb5), mRNA.
Kbtbd4	266.2	264.3	268.9	1.0174	181.2	188.7	1.04139	285.7	209.3	-1.36503	Mus musculus kelch repeat and BTB (POZ) domain containing 4 (Kbtbd4), mRNA.
Rreb1	253.7	274.5	254.8	-1.07732	115.5	113.4	-1.01852	217.3	159.2	-1.36495	Mus musculus ras responsive element binding protein 1 (Rreb1), transcript variant 3, mRNA.
Lcn2	67.3	65.2	63.4	-1.02839	70.5	72.2	1.02411	285	208.8	-1.36494	Mus musculus lipocalin 2 (Lcn2), mRNA.
Stx12	266.3	244	245.7	1.00697	229.6	223	-1.0296	309.2	226.6	-1.36452
LOC674706	2132	2080.9	1882.8	-1.10522	2350.3	2242.5	-1.04807	3245.7	2379.8	-1.36385	PREDICTED: Mus musculus similar to Zinc finger protein 341 (LOC674706), mRNA.
Slamf9	268.9	247.2	268.7	1.08697	297.6	266	-1.1188	531.3	389.6	-1.36371	Mus musculus SLAM family member 9 (Slamf9), mRNA.
Dlgap3	65.8	75.7	68.5	-1.10511	79.2	72	-1.1	81.5	59.8	-1.36288	Mus musculus discs, large (Drosophila) homolog-associated protein 3 (Dlgap3), mRNA.
Dpep1	66.7	66.5	57.7	-1.15251	68.2	52.6	-1.29658	68.4	50.2	-1.36255	Mus musculus dipeptidase 1 (renal) (Dpep1), mRNA.
Ppfibp1	193.4	197.2	185.3	-1.06422	236.1	262.2	1.11055	371	272.3	-1.36247	Mus musculus PTPRF interacting protein, binding protein 1 (liprin beta 1) (Ppfibp1), mRNA.
LOC640963	71.4	75.9	73.8	-1.02846	68.9	72.2	1.0479	89.6	65.8	-1.3617	PREDICTED: Mus musculus similar to STAT3-interacting protein as a repressor (LOC640963), misc RNA.
Olfr746	62.3	70.5	61	-1.15574	73.6	72.6	-1.01377	81	59.5	-1.36134	Mus musculus olfactory receptor 746 (Olfr746), mRNA.
Aven	181.5	191.7	194.8	1.01617	189.5	212.7	1.12243	247.2	181.6	-1.36123	Mus musculus apoptosis, caspase activation inhibitor (Aven), mRNA.
Sac3d1	144.3	124.4	114.2	-1.08932	119.1	113.9	-1.04565	146.3	107.5	-1.36093	Mus musculus SAC3 domain containing 1 (Sac3d1), mRNA.
Atp9b	229.7	237.3	233.8	-1.01497	273.8	300.4	1.09715	433.2	318.4	-1.36055	Mus musculus ATPase, class II, type 9B (Atp9b), mRNA.
Plod1	201.1	196	213.2	1.08776	209.1	221	1.05691	223.6	164.4	-1.3601	Mus musculus procollagen-lysine, 2-oxoglutarate 5-dioxygenase 1 (Plod1), mRNA.
Hsd17b14	90.4	88	85.2	-1.03286	98.6	91.9	-1.07291	111.8	82.2	-1.3601	Mus musculus hydroxysteroid (17-beta) dehydrogenase 14 (Hsd17b14), mRNA.
Rai14	245.3	245.8	270	1.09845	252.1	248.4	-1.0149	475	349.3	-1.35986	Mus musculus retinoic acid induced 14 (Rai14), mRNA.
Zfp513	154.6	143.4	140.6	-1.01991	164.4	157.8	-1.04183	227.6	167.4	-1.35962	Mus musculus zinc finger protein 513 (Zfp513), mRNA.
Cbl	91.2	99.9	88.6	-1.12754	97.7	96	-1.01771	113.2	83.3	-1.35894	Mus musculus Casitas B-lineage lymphoma (Cbl), mRNA.
Ecm1	172.1	183	185.7	1.01475	209.6	211.9	1.01097	280.2	206.3	-1.35822	Mus musculus extracellular matrix protein 1 (Ecm1), mRNA.
Olfr924	84.7	96.2	97.7	1.01559	94.6	99.2	1.04863	108.2	79.7	-1.35759	Mus musculus olfactory receptor 924 (Olfr924), mRNA.
Mid1	87	84.3	81.3	-1.0369	85.4	85.3	-1.00117	112	82.5	-1.35758	Mus musculus midline 1 (Mid1), transcript variant 2, mRNA.
Zfp207	597.2	559.7	592	1.05771	659.8	661.5	1.00258	1060.1	780.9	-1.35754	Mus musculus zinc finger protein 207 (Zfp207), mRNA.
5133401N09Rik	417.3	417.4	402.8	-1.03625	411	443.4	1.07883	593.2	437	-1.35744	Mus musculus RIKEN cDNA 5133401N09 gene (5133401N09Rik), transcript variant 1, mRNA.
Dcakd	2199.8	2240.1	2282.5	1.01893	2251.4	2390.3	1.06169	3840.1	2829.3	-1.35726	Mus musculus dephospho-CoA kinase domain containing (Dcakd), mRNA.
Ctcfl	194	213.6	212.4	-1.00565	240.7	240.9	1.00083	326.6	240.7	-1.35688	Mus musculus CCCTC-binding factor (zinc finger protein)-like (Ctcfl), mRNA.
Usp15	100	119.5	105.7	-1.13056	108.4	116.2	1.07196	105.4	77.7	-1.3565	Mus musculus ubiquitin specific peptidase 15 (Usp15), mRNA.
Irx2	440.5	418.7	418.3	-1.00096	203.6	198.7	-1.02466	310.7	229.1	-1.35618	Mus musculus Iroquois related homeobox 2 (Drosophila) (Irx2), mRNA.
Txnip	4581.1	1548.1	1684.8	1.0883	616.9	427.9	-1.44169	1861.9	1373.2	-1.35588	Mus musculus thioredoxin interacting protein (Txnip), transcript variant 1, mRNA.
Leprotl1	1090.2	1032.8	1029.3	-1.0034	853.3	946	1.10864	960.1	708.1	-1.35588	Mus musculus leptin receptor overlapping transcript-like 1 (Leprotl1), mRNA.
Gjb1	86.6	93.4	100.6	1.07709	85.4	99.5	1.16511	117.4	86.6	-1.35566	Mus musculus gap junction protein, beta 1 (Gjb1), mRNA.
Slc11a2	391.5	382.3	363.4	-1.05201	405.3	536.5	1.32371	592.9	437.9	-1.35396	Mus musculus solute carrier family 11 (proton-coupled divalent metal ion transporters), member 2 (Slc11a2), mRNA.
EG630499	314	356.6	354.8	-1.00507	439.8	457.2	1.03956	658.5	486.7	-1.35299	Mus musculus predicted gene, EG630499 (EG630499), mRNA.
Zfp386	96	97.1	105.2	1.08342	99	92.4	-1.07143	118.9	87.9	-1.35267	Mus musculus zinc finger protein 386 (Kruppel-like) (Zfp386), transcript variant 1, mRNA.
Azi2	177.4	152.2	153.7	1.00986	159.3	164.8	1.03453	235.6	174.2	-1.35247	Mus musculus 5-azacytidine induced gene 2 (Azi2), transcript variant 2, mRNA.
Sprr2k	66.1	59.2	67.5	1.1402	75.5	81.7	1.08212	92.1	68.1	-1.35242	Mus musculus small proline-rich protein 2K (Sprr2k), mRNA.
Gga3	173.4	168.1	166.3	-1.01082	151.7	146.3	-1.03691	238	176	-1.35227	Mus musculus golgi associated, gamma adaptin ear containing, ARF binding protein 3 (Gga3), mRNA.
Arntl	413.6	458.5	434.6	-1.05499	361.2	404.2	1.11905	600.9	444.4	-1.35216	Mus musculus aryl hydrocarbon receptor nuclear translocator-like (Arntl), mRNA.
Casp7	248.5	223.6	248.3	1.11047	240.9	276.6	1.14819	332	245.6	-1.35179	Mus musculus caspase 7 (Casp7), mRNA.
Snx11	1011	773.1	860.5	1.11305	680.9	756.1	1.11044	1214.3	898.4	-1.35163	Mus musculus sorting nexin 11 (Snx11), mRNA.
Cndp2	149.6	151.1	154.6	1.02316	173.7	172.8	-1.00521	254.5	188.3	-1.35157	Mus musculus CNDP dipeptidase 2 (metallopeptidase M20 family) (Cndp2), mRNA.
Tmbim1	219.3	205.9	209.9	1.01943	285.5	381.5	1.33625	478.8	354.5	-1.35063	Mus musculus transmembrane BAX inhibitor motif containing 1 (Tmbim1), mRNA.
Lgals8	934	1083	996	-1.08735	1199.3	1355.4	1.13016	1511.6	1120.4	-1.34916	Mus musculus lectin, galactose binding, soluble 8 (Lgals8), mRNA.
Prkacb	3736.5	3534.9	3347.8	-1.05589	3163.9	3822.5	1.20816	3590.3	2662.1	-1.34867	Mus musculus protein kinase, cAMP dependent, catalytic, beta (Prkacb), mRNA.
Ifrg15	155.8	154.7	156.6	1.01228	149.7	170.9	1.14162	212.7	157.9	-1.34706	Mus musculus interferon alpha responsive gene (Ifrg15), mRNA.
Yipf2	169	173.3	156.1	-1.11019	160.7	149.5	-1.07492	191.8	142.5	-1.34596	Mus musculus Yip1 domain family, member 2 (Yipf2), mRNA.
Ccl7	74	90.6	89.9	-1.00779	510.9	424.9	-1.2024	2007.1	1491.3	-1.34587	Mus musculus chemokine (C-C motif) ligand 7 (Ccl7), mRNA.
Ogfr	2279.9	2403.9	2454.9	1.02122	2708	2914.6	1.07629	3362.5	2498.6	-1.34575	Mus musculus opioid growth factor receptor (Ogfr), mRNA.
Extl3	438.6	397.5	426.5	1.07296	334.3	323.3	-1.03402	491.8	365.5	-1.34555	Mus musculus exostoses (multiple)-like 3 (Extl3), mRNA.
Oas1g	3986.9	3705.7	3849.5	1.03881	3720.6	3731.1	1.00282	4995.1	3716.9	-1.34389	Mus musculus 2'-5' oligoadenylate synthetase 1G (Oas1g), mRNA.
Tbc1d20	465.6	366.5	402.7	1.09877	305.3	379.8	1.24402	366.6	272.8	-1.34384	Mus musculus TBC1 domain family, member 20 (Tbc1d20), mRNA.
Gm885	1512.9	1500.2	1403.4	-1.06898	1464.7	1372.6	-1.0671	2052.7	1528.3	-1.34313	Mus musculus gene model 885, (NCBI) (Gm885), mRNA.
Zfp212	167.6	167.9	165.2	-1.01634	135.7	151.8	1.11864	188.4	140.3	-1.34284	Mus musculus Zinc finger protein 212 (Zfp212), mRNA.
Atp13a4	63.4	55.3	78.1	1.4123	80.1	85.8	1.07116	94.8	70.6	-1.34278	Mus musculus ATPase type 13A4 (Atp13a4), mRNA.
OTTMUSG00000003802	91.2	87.9	99	1.12628	96.6	93.2	-1.03648	119.7	89.2	-1.34193	Mus musculus predicted gene, OTTMUSG00000003802 (OTTMUSG00000003802), mRNA.
Olfr825	61.8	61.6	73.4	1.19156	65.8	63.4	-1.03785	79.7	59.4	-1.34175	Mus musculus olfactory receptor 825 (Olfr825), mRNA.
Il4ra	69.9	65.2	73.6	1.12883	63.2	69	1.09177	101.7	75.8	-1.34169	Mus musculus interleukin 4 receptor, alpha (Il4ra), mRNA.
Olfr117	64.8	65.1	65.7	1.00922	74.1	68.5	-1.08175	75	55.9	-1.34168	Mus musculus olfactory receptor 117 (Olfr117), mRNA.
Stk19	173.5	159.9	178.7	1.11757	157.2	172.2	1.09542	247	184.1	-1.34166	Mus musculus serine/threonine kinase 19 (Stk19), mRNA.
LOC100048082	84.7	83.5	81.5	-1.02454	74.9	87.1	1.16288	119.5	89.1	-1.34119	PREDICTED: Mus musculus similar to Serine/threonine-protein kinase QSK (LOC100048082), misc RNA.
Nrp2	93.3	95.1	92	-1.0337	109.5	113.2	1.03379	150.2	112	-1.34107	Mus musculus neuropilin 2 (Nrp2), transcript variant 5, mRNA.
Cebpe	191	193.4	205.9	1.06463	193.8	199.7	1.03044	220.8	164.8	-1.33981	Mus musculus CCAAT/enhancer binding protein (C/EBP), epsilon (Cebpe), mRNA.
Oasl2	2313.5	2348	2268.5	-1.03505	2294.9	2398.3	1.04506	3443.9	2572.1	-1.33894	Mus musculus 2'-5' oligoadenylate synthetase-like 2 (Oasl2), mRNA.
Zfp691	149.4	115	111.5	-1.03139	133	98.2	-1.35438	178.6	133.4	-1.33883	Mus musculus zinc finger protein 691 (Zfp691), mRNA.
Sav1	1214.2	1132.1	1143.3	1.00989	1254.6	1155.1	-1.08614	1908.6	1425.6	-1.3388	Mus musculus salvador homolog 1 (Drosophila) (Sav1), mRNA.
Fbxo42	186.8	175.4	187.5	1.06899	133.9	132.2	-1.01286	185.2	138.4	-1.33815	Mus musculus F-box protein 42 (Fbxo42), mRNA.
Trip12	1380.6	1498.1	1379.1	-1.08629	1508.8	1687.1	1.11817	2131.2	1593.3	-1.3376	Mus musculus thyroid hormone receptor interactor 12 (Trip12), mRNA.
Pld3	435.6	431.2	439.4	1.01902	544.6	572.4	1.05105	934.4	698.6	-1.33753	Mus musculus phospholipase D family, member 3 (Pld3), mRNA.
Prkd3	604	570.3	607.5	1.06523	547.2	531.9	-1.02876	769.6	575.4	-1.3375	Mus musculus protein kinase D3 (Prkd3), mRNA.
Tgoln1	270.4	274.9	280.1	1.01892	298.3	377.9	1.26685	367.5	274.8	-1.33734	Mus musculus trans-golgi network protein (Tgoln1), mRNA.
Smcr7	161.9	127.6	132.9	1.04154	93.9	97.7	1.04047	147.5	110.3	-1.33726	Mus musculus Smith-Magenis syndrome chromosome region, candidate 7 homolog (human) (Smcr7), mRNA.
Rab3ip	111	107.9	109.1	1.01112	95.7	95.2	-1.00525	126.9	94.9	-1.3372	Mus musculus RAB3A interacting protein (Rab3ip), mRNA.
9130227C08Rik	144.3	142.3	147.1	1.03373	132.6	133.2	1.00452	150.7	112.7	-1.33718	Mus musculus RIKEN cDNA 9130227C08Rik gene (9130227C08Rik), mRNA.
1600014C10Rik	78.3	76.3	83	1.08781	61.9	65.4	1.05654	98.4	73.6	-1.33696	Mus musculus RIKEN cDNA 1600014C10 gene (1600014C10Rik), mRNA.
Zfp324	143.2	136.2	118.2	-1.15228	88.9	94.6	1.06412	125.8	94.1	-1.33688	Mus musculus zinc finger protein 324 (Zfp324), mRNA.
Morc3	889.5	1054.9	895.8	-1.17761	668.3	659.2	-1.0138	984.4	736.4	-1.33677	Mus musculus microrchidia 3 (Morc3), mRNA. XM_978468 XM_978538 XM_978584 XM_978615
Ebi3	487	488.3	510.9	1.04628	653	615.5	-1.06093	1144.4	856.3	-1.33645	Mus musculus Epstein-Barr virus induced gene 3 (Ebi3), mRNA.
Zfp91	525.1	575.3	557.1	-1.03267	560.1	584.1	1.04285	762.7	570.8	-1.33619	Mus musculus zinc finger protein 91 (Zfp91), mRNA.
Abhd5	350.1	368.7	399.9	1.08462	312.8	349.1	1.11605	329.1	246.3	-1.33618	Mus musculus abhydrolase domain containing 5 (Abhd5), mRNA.
Farsa	111.2	91.3	92.6	1.01424	111	108.5	-1.02304	138.4	103.6	-1.33591	Mus musculus phenylalanyl-tRNA synthetase, alpha subunit (Farsa), mRNA.
Actn4	629.1	575.2	599.6	1.04242	622.8	629.3	1.01044	761.5	570.2	-1.3355	Mus musculus actinin alpha 4 (Actn4), mRNA.
Wdr37	121.9	139.6	129.9	-1.07467	130.4	128.3	-1.01637	176.1	131.9	-1.3351	Mus musculus WD repeat domain 37 (Wdr37), transcript variant 1, mRNA.
LOC100046056	277.6	256.1	256.1	1	203	209.8	1.0335	309.6	231.9	-1.33506	PREDICTED: Mus musculus similar to Pre-B-cell leukemia transcription factor interacting protein 1 (LOC100046056), mRNA.
Aldh4a1	667.2	641.2	629.6	-1.01842	579.8	746.6	1.28769	693.4	519.5	-1.33474	Mus musculus aldehyde dehydrogenase 4 family, member A1 (Aldh4a1), nuclear gene encoding mitochondrial protein, mRNA.
1110057K04Rik	465.4	412	439.8	1.06748	370.9	423.6	1.14209	475.9	356.6	-1.33455	Mus musculus RIKEN cDNA 1110057K04 gene (1110057K04Rik), mRNA.
Foxp1	203.7	218.5	215.4	-1.01439	220.3	224.3	1.01816	367.8	275.6	-1.33454	Mus musculus forkhead box P1 (Foxp1), mRNA.
Glipr2	101	98.6	99.3	1.0071	100.3	102.9	1.02592	150	112.4	-1.33452	Mus musculus GLI pathogenesis-related 2 (Glipr2), mRNA.
H28	869.8	912.3	939.7	1.03003	987.4	996.4	1.00911	1170.4	877.1	-1.3344	Mus musculus histocompatibility 28 (H28), mRNA.
Ela3b	87.2	91.2	96.8	1.0614	84.6	97.8	1.15603	100.6	75.4	-1.33422
Serpinb6b	108.3	114.8	115.9	1.00958	186.2	170	-1.09529	456.4	342.1	-1.33411	Mus musculus serine (or cysteine) peptidase inhibitor, clade B, member 6b (Serpinb6b), mRNA.
Ankrd12	127.7	127.3	133.9	1.05185	95.8	109.5	1.14301	130.2	97.6	-1.33402	Mus musculus ankyrin repeat domain 12 (Ankrd12), mRNA.
Nrbf2	364.7	322.5	359.3	1.11411	308.5	271	-1.13838	427	320.1	-1.33396	Mus musculus nuclear receptor binding factor 2 (Nrbf2), mRNA.
LOC218963	22338.7	24620.9	24488.9	-1.00539	13427	17555.8	1.3075	17555.8	13170.1	-1.333	Mus musculus ubiquitin pseudogene (LOC218963), non-coding RNA.
Sass6	924.9	960.8	853.8	-1.12532	880	865.1	-1.01722	1216.7	913	-1.33264	Mus musculus spindle assembly 6 homolog (C. elegans) (Sass6), mRNA.
Myo1d	98.8	109.5	96.2	-1.13825	104.5	120.8	1.15598	146.3	109.8	-1.33242	Mus musculus myosin ID (Myo1d), mRNA.
Dok3	3284	3475.6	3510.3	1.00998	2744.3	2988.8	1.08909	3219	2416.4	-1.33215	Mus musculus docking protein 3 (Dok3), mRNA.
Creb3	998.2	918.2	969.7	1.05609	996.4	1062	1.06584	1508.3	1132.8	-1.33148	Mus musculus cAMP responsive element binding protein 3 (Creb3), mRNA.
Rrbp1	608.7	554.6	531.9	-1.04268	605	690.6	1.14149	792.4	595.3	-1.33109	Mus musculus ribosome binding protein 1 (Rrbp1), transcript variant 1, mRNA.
Asb6	145.7	139.2	142.6	1.02443	161.1	155.4	-1.03668	240.9	181	-1.33094	Mus musculus ankyrin repeat and SOCS box-containing 6 (Asb6), mRNA.
D8Ertd82e	185.2	175.3	200.7	1.14489	169.6	212.6	1.25354	256.7	192.9	-1.33074	Mus musculus DNA segment, Chr 8, ERATO Doi 82, expressed (D8Ertd82e), mRNA.
LOC100048645	1719.1	1591.5	1654	1.03927	749.4	803.3	1.07192	1141.7	858.4	-1.33003	PREDICTED: Mus musculus similar to cysteine and glycine-rich protein 2 binding protein (LOC100048645), mRNA.
Fam129b	5337	5102.8	5240.9	1.02706	6339.1	7253.9	1.14431	7826.6	5884.8	-1.32997	Mus musculus family with sequence similarity 129, member B (Fam129b), mRNA.
Rab11fip5	618.4	663	693.9	1.04661	431.3	426	-1.01244	763.5	574.1	-1.32991	Mus musculus RAB11 family interacting protein 5 (class I) (Rab11fip5), transcript variant 1, mRNA.
1600021P15Rik	102.7	109	98.1	-1.11111	102.7	99.3	-1.03424	152.8	114.9	-1.32985	Mus musculus RIKEN cDNA 1600021P15 gene (1600021P15Rik), mRNA.
Tmprss13	78.9	76.1	77.1	1.01314	81.4	86.9	1.06757	109.3	82.2	-1.32968	Mus musculus transmembrane protease, serine 13 (Tmprss13), mRNA.
Mobk1b	1524.9	1421.9	1456.3	1.02419	1391.8	1556.7	1.11848	1604	1206.6	-1.32936
Ctr9	118.5	123.4	123.1	-1.00244	122.7	126.3	1.02934	144.5	108.7	-1.32935	Mus musculus Ctr9, Paf1/RNA polymerase II complex component, homolog (S. cerevisiae) (Ctr9), mRNA.
Fam20b	389.3	401.8	401.8	1	396.1	453.4	1.14466	594.5	447.3	-1.32909	Mus musculus family with sequence similarity 20, member B (Fam20b), mRNA.
Mmp14	71.2	66.7	67.3	1.009	107.6	102.6	-1.04873	375.8	282.8	-1.32885	Mus musculus matrix metallopeptidase 14 (membrane-inserted) (Mmp14), mRNA.
Pcdh7	516.9	594.3	542.3	-1.09589	814.3	925.2	1.13619	975.5	734.3	-1.32848	Mus musculus protocadherin 7 (Pcdh7), mRNA.
Stard3	419	398.1	406.8	1.02185	368.9	351.4	-1.0498	484.8	365	-1.32822	Mus musculus START domain containing 3 (Stard3), mRNA.
Tmod3	562.9	655.5	559.3	-1.172	581.9	631.6	1.08541	702.2	528.8	-1.32791	Mus musculus tropomodulin 3 (Tmod3), mRNA.
Mlp	249	458.4	512.3	1.11758	1229.6	1219.4	-1.00836	1734.8	1306.9	-1.32742
Zfp276	123.3	101	120.1	1.18911	97.9	113.9	1.16343	146.4	110.3	-1.32729	Mus musculus zinc finger protein (C2H2 type) 276 (Zfp276), mRNA.
1200002N14Rik	2993.6	2816.2	2777.7	-1.01386	2080.9	1944.3	-1.07026	3085.9	2325.3	-1.3271	Mus musculus RIKEN cDNA 1200002N14 gene (1200002N14Rik), mRNA.
Arf3	699.9	602.8	740	1.2276	790.3	734.7	-1.07568	1083.1	817.1	-1.32554	Mus musculus ADP-ribosylation factor 3 (Arf3), mRNA.
Nckap1l	2012.5	2065.6	1942.1	-1.06359	2169.8	2568.9	1.18393	3661	2762.2	-1.32539	Mus musculus NCK associated protein 1 like (Nckap1l), mRNA.
Med29	76	101.5	83.5	-1.21557	86.7	102.9	1.18685	110.8	83.6	-1.32536	Mus musculus mediator complex subunit 29 (Med29), mRNA.
LOC100048726	260.8	259.4	304.1	1.17232	290.8	288.2	-1.00902	384.6	290.2	-1.32529	PREDICTED: Mus musculus similar to SEC23B (LOC100048726), mRNA.
Cd180	770.2	767.4	759.6	-1.01027	688.3	788.8	1.14601	1097.6	828.2	-1.32528	Mus musculus CD180 antigen (Cd180), mRNA.
Rab21	444.8	430.7	443.8	1.03042	467.5	464.6	-1.00624	543.1	409.8	-1.32528	Mus musculus RAB21, member RAS oncogene family (Rab21), mRNA.
Plod3	5237.4	5210	5169.8	-1.00778	4292.7	4690.9	1.09276	6383.2	4816.8	-1.3252	Mus musculus procollagen-lysine, 2-oxoglutarate 5-dioxygenase 3 (Plod3), mRNA.
Llgl1	2468.7	2427.2	2278.8	-1.06512	1887.5	2016	1.06808	2606.4	1967	-1.32506	Mus musculus lethal giant larvae homolog 1 (Drosophila) (Llgl1), mRNA.
Med24	964.7	1010.2	909.6	-1.1106	1008.2	1174.9	1.16534	1216.3	918	-1.32495	Mus musculus mediator complex subunit 24 (Med24), mRNA.
Rabep2	155.7	164.4	171.3	1.04197	140.3	158.3	1.1283	172.2	130	-1.32462	Mus musculus rabaptin, RAB GTPase binding effector protein 2 (Rabep2), mRNA.
Mitf	107.1	107.4	108.8	1.01304	101.6	104.5	1.02854	169.1	127.7	-1.3242	Mus musculus microphthalmia-associated transcription factor (Mitf), mRNA.
Atp6v0d2	71.4	69.2	68.4	-1.0117	63.6	63.1	-1.00792	73.2	55.3	-1.32369	Mus musculus ATPase, H+ transporting, lysosomal V0 subunit D2 (Atp6v0d2), mRNA.
Lysmd1	465.6	485.1	470.5	-1.03103	252.3	191.1	-1.32025	446.2	337.2	-1.32325	Mus musculus LysM, putative peptidoglycan-binding, domain containing 1 (Lysmd1), mRNA.
Hao1	102.5	106.8	101.7	-1.05015	112.7	135	1.19787	211.8	160.1	-1.32292	Mus musculus hydroxyacid oxidase 1, liver (Hao1), mRNA.
Caskin2	124.9	121.5	124.7	1.02634	87.6	89.3	1.01941	127.1	96.1	-1.32258	Mus musculus CASK-interacting protein 2 (Caskin2), mRNA.
P2ry6	4190.9	4338.2	4528.6	1.04389	4826.5	4297.3	-1.12315	8441.6	6383.2	-1.32247	Mus musculus pyrimidinergic receptor P2Y, G-protein coupled, 6 (P2ry6), mRNA.
D17Wsu92e	199.4	185.4	196.7	1.06095	217.7	216.9	-1.00369	352.8	266.8	-1.32234	Mus musculus DNA segment, Chr 17, Wayne State University 92, expressed (D17Wsu92e), transcript variant 1, mRNA. XM_915193 XM_923626 XM_923628 XM_923630 XM_923632
Dgki	86.6	88.3	91.1	1.03171	103.6	97.5	-1.06256	107.6	81.4	-1.32187	Mus musculus diacylglycerol kinase, iota (Dgki), mRNA.
Camkk2	251.8	234.9	213.5	-1.10023	245.4	220.3	-1.11394	320.1	242.2	-1.32164	Mus musculus calcium/calmodulin-dependent protein kinase kinase 2, beta (Camkk2), mRNA.
Gm347	470.6	400	406.1	1.01525	182	172.7	-1.05385	257.6	195	-1.32103	Mus musculus gene model 347, (NCBI) (Gm347), mRNA.
Ms4a6c	137.7	142.7	133.1	-1.07213	148.6	153.6	1.03365	222.3	168.3	-1.32086
Kcnk13	1166.9	1257.9	1250.7	-1.00576	615.8	732.1	1.18886	962.7	728.9	-1.32076	Mus musculus potassium channel, subfamily K, member 13 (Kcnk13), mRNA.
Basp1	76.7	74.8	79.8	1.06684	92	106.8	1.16087	100.1	75.8	-1.32058	Mus musculus brain abundant, membrane attached signal protein 1 (Basp1), mRNA.
Calcrl	137.2	123.4	115.6	-1.06747	176.9	156.2	-1.13252	278.2	210.7	-1.32036	Mus musculus calcitonin receptor-like (Calcrl), mRNA.
Hnrph1	206	204.3	194.9	-1.04823	190.5	269.9	1.4168	260.2	197.1	-1.32014
Csrnp2	202.7	194.1	187.5	-1.0352	123.7	179.8	1.45352	194.4	147.3	-1.31976	Mus musculus cysteine-serine-rich nuclear protein 2 (Csrnp2), mRNA.
Senp1	166.6	164.9	166.1	1.00728	156.6	180.2	1.1507	203.9	154.5	-1.31974	Mus musculus SUMO1/sentrin specific peptidase 1 (Senp1), mRNA.
1700093K21Rik	63.1	70.5	68.1	-1.03524	63.4	69.4	1.09464	67.7	51.3	-1.31969	Mus musculus RIKEN cDNA 1700093K21 gene (1700093K21Rik), mRNA.
Plek2	83.6	85.8	81.2	-1.05665	117.8	145.8	1.23769	163.9	124.2	-1.31965	Mus musculus pleckstrin 2 (Plek2), mRNA.
Slc37a3	96.4	96.8	99.1	1.02376	94.9	93.9	-1.01065	128	97	-1.31959	Mus musculus solute carrier family 37 (glycerol-3-phosphate transporter), member 3 (Slc37a3), mRNA.
Olfr1209	66	68.5	68.3	-1.00293	65.9	62.1	-1.06119	73.5	55.7	-1.31957	Mus musculus olfactory receptor 1209 (Olfr1209), mRNA.
Zdhhc7	1038.8	1045.6	1066.3	1.0198	700	798.3	1.14043	922.5	699.4	-1.31899	Mus musculus zinc finger, DHHC domain containing 7 (Zdhhc7), mRNA.
Tec	375	442.4	449.8	1.01673	350.8	368.4	1.05017	487.2	369.5	-1.31854	Mus musculus cytoplasmic tyrosine kinase, Dscr28C related (Drosophila) (Tec), mRNA.
D830014E11Rik	70.5	73.2	65.9	-1.11077	71.7	69.9	-1.02575	82.8	62.8	-1.31847	Mus musculus RIKEN cDNA D830014E11 gene (D830014E11Rik), mRNA.
Tecta	67.1	61.6	74.9	1.21591	69.7	70	1.0043	81.6	61.9	-1.31826	Mus musculus tectorin alpha (Tecta), mRNA.
2410081M15Rik	110.8	120.6	116.5	-1.03519	86.5	78	-1.10897	114.8	87.1	-1.31803	Mus musculus RIKEN cDNA 2410081M15 gene (2410081M15Rik), mRNA.
Alg2	276.4	257.3	278.2	1.08123	204.9	215.7	1.05271	236.7	179.6	-1.31793	Mus musculus asparagine-linked glycosylation 2 homolog (yeast, alpha-1,3-mannosyltransferase) (Alg2), mRNA.
Tarbp2	178.6	158.4	175.8	1.10985	166.8	202.9	1.21643	230.2	174.7	-1.31769	Mus musculus TAR (HIV) RNA binding protein 2 (Tarbp2), mRNA.
Rilpl1	140.1	129.4	138.8	1.07264	116.9	118.1	1.01027	152.1	115.5	-1.31688	Mus musculus Rab interacting lysosomal protein-like 1 (Rilpl1), mRNA.
Bmf	98.5	81.4	93.9	1.15356	88.6	79	-1.12152	96	72.9	-1.31687
Zfp672	296.1	335	302.3	-1.10817	315.4	365	1.15726	432.1	328.5	-1.31537	Mus musculus zinc finger protein 672 (Zfp672), mRNA.
Mvp	1237.9	1258.5	1262	1.00278	1257.2	1344.4	1.06936	1795.2	1365.3	-1.31488	Mus musculus major vault protein (Mvp), mRNA.
Stk38l	247.8	211.8	231.1	1.09112	171.1	189.7	1.10871	274.9	209.1	-1.31468	Mus musculus serine/threonine kinase 38 like (Stk38l), mRNA.
Dnajc7	1797.2	1284.3	1704.1	1.32687	1532.2	1646.2	1.0744	1797.5	1367.4	-1.31454
Zfyve26	428.3	424.5	385.7	-1.1006	303.7	282	-1.07695	359.2	273.5	-1.31335	Mus musculus zinc finger, FYVE domain containing 26 (Zfyve26), mRNA. XM_919000 XM_919020 XM_919029 XM_919036 XM_919042 XM_986993 XM_990500 XM_990526 XM_990571 XM_990599 XM_990628
Zbed4	339.2	324	333.8	1.03025	286.7	297.8	1.03872	410	312.2	-1.31326	Mus musculus zinc finger, BED domain containing 4 (Zbed4), mRNA.
Plekhf1	102.4	92.2	90.5	-1.01878	134.6	167.1	1.24146	169.1	128.8	-1.31289	Mus musculus pleckstrin homology domain containing, family F (with FYVE domain) member 1 (Plekhf1), mRNA.
Scfd2	64.9	69.4	60.6	-1.14521	69.6	64.4	-1.08075	78.6	59.9	-1.31219	Mus musculus sec1 family domain containing 2 (Scfd2), mRNA.
Msn	1203.1	1209	1199.9	-1.00758	1520.2	1468.2	-1.03542	2012.6	1534.1	-1.31191	Mus musculus moesin (Msn), mRNA.
Arhgap30	1651.5	1594.2	1512.5	-1.05402	1207.4	1147.2	-1.05248	1688.7	1287.9	-1.3112	Mus musculus Rho GTPase activating protein 30 (Arhgap30), mRNA.
Ttc19	244.5	265.8	266.5	1.00263	350.3	337.4	-1.03823	531.3	405.3	-1.31088	Mus musculus tetratricopeptide repeat domain 19 (Ttc19), transcript variant 1, mRNA.
Mmp19	89.5	77.2	83.6	1.0829	102.4	84.1	-1.2176	106.8	81.5	-1.31043	Mus musculus matrix metallopeptidase 19 (Mmp19), mRNA.
C5ar1	155.1	185.8	199.7	1.07481	338.1	342.1	1.01183	517.2	394.7	-1.31036	Mus musculus complement component 5a receptor 1 (C5ar1), mRNA.
9130017N09Rik	94.4	97	93.8	-1.03412	88.9	88.3	-1.0068	98.8	75.4	-1.31034	Mus musculus RIKEN cDNA 9130017N09 gene (9130017N09Rik), mRNA.
Capn2	622	702.4	654.4	-1.07335	743.5	775.9	1.04358	1076.1	821.3	-1.31024	Mus musculus calpain 2 (Capn2), mRNA.
Hoxb5	162.1	145.8	139.9	-1.04217	129.1	130	1.00697	202	154.2	-1.30999	Mus musculus homeo box B5 (Hoxb5), mRNA.
Flii	397.1	410.3	416.2	1.01438	413.5	438.7	1.06094	500.2	381.9	-1.30977	Mus musculus flightless I homolog (Drosophila) (Flii), mRNA.
Nsmaf	504	502.8	542.8	1.07955	467.2	480.5	1.02847	525.2	401	-1.30973	Mus musculus neutral sphingomyelinase (N-SMase) activation associated factor (Nsmaf), mRNA.
Magea2	76.5	81	79.3	-1.02144	75.1	75.1	1	80.8	61.7	-1.30956	Mus musculus melanoma antigen, family A, 2 (Magea2), mRNA.
BC038822	88.7	84.9	92.2	1.08598	81	71.7	-1.12971	91.1	69.6	-1.30891	Mus musculus cDNA sequence BC038822 (BC038822), mRNA.
Sdc4	522.1	677.4	616.5	-1.09878	569	654.2	1.14974	918.2	701.6	-1.30872	Mus musculus syndecan 4 (Sdc4), mRNA.
Rps19bp1	177.1	183.1	180	-1.01722	187.9	211	1.12294	259.1	198	-1.30859	Mus musculus ribosomal protein S19 binding protein 1 (Rps19bp1), mRNA.
Plscr3	100.5	95.6	100.2	1.04812	90.2	97.3	1.07871	109.2	83.5	-1.30778	Mus musculus phospholipid scramblase 3 (Plscr3), mRNA.
1700021K19Rik	170.3	157.1	164.4	1.04647	95.8	108.8	1.1357	130.9	100.1	-1.30769	Mus musculus RIKEN cDNA 1700021K19 gene (1700021K19Rik), mRNA.
Rhog	775.5	810.7	806.4	-1.00533	999.5	878.8	-1.13735	1322.1	1011.6	-1.30694	Mus musculus ras homolog gene family, member G (Rhog), mRNA.
9430070O13Rik	69.9	69.1	66.2	-1.04381	74.2	60.9	-1.21839	79.7	61	-1.30656	Mus musculus RIKEN cDNA 9430070O13 gene (9430070O13Rik), mRNA.
Patl1	726.5	702.2	657.4	-1.06815	652.8	749.7	1.14844	879.4	673.1	-1.30649	Mus musculus protein associated with topoisomerase II homolog 1 (yeast) (Patl1), mRNA.
Rps6ka3	426.1	457.7	412.4	-1.10984	464.5	476.3	1.0254	652.8	499.7	-1.30638	Mus musculus ribosomal protein S6 kinase polypeptide 3 (Rps6ka3), mRNA.
Pmp22	839.5	1079	1128.3	1.04569	1359.2	1905.1	1.40163	1355.1	1037.6	-1.30599	Mus musculus peripheral myelin protein 22 (Pmp22), mRNA.
Ctsl	170.8	196.1	197.9	1.00918	206.5	239.1	1.15787	271.2	207.7	-1.30573	Mus musculus cathepsin L (Ctsl), mRNA.
E330016A19Rik	130.7	126.5	122.5	-1.03265	106.9	93.1	-1.14823	154.2	118.1	-1.30567	Mus musculus RIKEN cDNA E330016A19 gene (E330016A19Rik), mRNA.
Il13ra1	872.7	900.9	931	1.03341	1049.8	975.2	-1.0765	1627.7	1246.7	-1.30561	Mus musculus interleukin 13 receptor, alpha 1 (Il13ra1), mRNA.
Fus	1014.1	935.6	1148.8	1.22788	1100.2	1408.3	1.28004	1565.3	1199	-1.3055
Sec24d	74.8	78.9	75.5	-1.04503	64.8	63.5	-1.02047	84.2	64.5	-1.30543	Mus musculus Sec24 related gene family, member D (S. cerevisiae) (Sec24d), mRNA.
Tmem87a	590.5	646.9	598.3	-1.08123	598.9	651.9	1.0885	810.7	621.2	-1.30505	Mus musculus transmembrane protein 87A (Tmem87a), mRNA.
H2-M11	70.6	83.9	77.2	-1.08679	74.3	80.9	1.08883	93.7	71.8	-1.30501	Mus musculus histocompatibility 2, M region locus 11 (H2-M11), mRNA.
Urm1	171.6	143.6	168.1	1.17061	123.8	148.4	1.19871	157.1	120.4	-1.30482	Mus musculus ubiquitin related modifier 1 homolog (S. cerevisiae) (Urm1), mRNA.
Trmt12	83	78.8	75.1	-1.04927	76.8	86.2	1.1224	82.2	63	-1.30476	Mus musculus tRNA methyltranferase 12 homolog (S. cerevisiae) (Trmt12), mRNA.
Pscd1	104.9	120.6	116.8	-1.03253	121.2	128.3	1.05858	149.1	114.3	-1.30446	Mus musculus pleckstrin homology, Sec7 and coiled-coil domains 1 (Pscd1), mRNA.
4930547C10Rik	106.4	105	96.7	-1.08583	101.4	124.1	1.22387	120.4	92.3	-1.30444	Mus musculus RIKEN cDNA 4930547C10 gene (4930547C10Rik), mRNA.
Ddit4	314	401.1	439.2	1.09499	106.8	104.7	-1.02006	227.3	174.3	-1.30407	Mus musculus DNA-damage-inducible transcript 4 (Ddit4), mRNA.
Pilra	66.4	69.9	70.5	1.00858	75	72.2	-1.03878	79.6	61.1	-1.30278	Mus musculus paired immunoglobin-like type 2 receptor alpha (Pilra), mRNA.
Hoxb6	100.5	93.6	98.1	1.04808	88.5	85.7	-1.03267	114.5	87.9	-1.30262	Mus musculus homeo box B6 (Hoxb6), mRNA.
Snw1	116.1	107.8	115.7	1.07328	110.6	107.7	-1.02693	143.1	109.9	-1.30209	Mus musculus SNW domain containing 1 (Snw1), mRNA.
Hoxd11	77.5	77.4	70.9	-1.09168	75.3	89.6	1.18991	91.4	70.2	-1.30199	Mus musculus homeo box D11 (Hoxd11), mRNA.
Dck	391.4	376.1	352.2	-1.06786	342.4	365.4	1.06717	429.9	330.2	-1.30194	Mus musculus deoxycytidine kinase (Dck), mRNA.
Il19	73.4	67.5	71.5	1.05926	73.4	76.9	1.04768	104.8	80.5	-1.30186	Mus musculus interleukin 19 (Il19), mRNA.
Olfr986	63.3	67.3	61.7	-1.09076	62.3	64.9	1.04173	67.3	51.7	-1.30174	Mus musculus olfactory receptor 986 (Olfr986), mRNA.
Cpne8	292.5	296.2	294.6	-1.00543	269	271.6	1.00967	484.8	372.5	-1.30148	Mus musculus copine VIII (Cpne8), transcript variant 1, mRNA.
Ddit3	482.9	574.2	580.6	1.01115	282.1	332.9	1.18008	331.6	254.9	-1.3009	Mus musculus DNA-damage inducible transcript 3 (Ddit3), mRNA.
Slfn2	1010.8	1313.5	1230.2	-1.06771	2305.4	2243.7	-1.0275	2858.8	2198.2	-1.30052	Mus musculus schlafen 2 (Slfn2), mRNA.
Sim2	62	67.8	66.9	-1.01345	61.5	67.1	1.09106	76.2	58.6	-1.30034	Mus musculus single-minded homolog 2 (Drosophila) (Sim2), mRNA.
Ubb	26175.1	29104.6	31339.8	1.0768	16672.8	22039.5	1.32188	22493.5	17299.4	-1.30025	Mus musculus ubiquitin B (Ubb), mRNA.
Krt17	69.7	62.9	66.6	1.05882	68.1	72.5	1.06461	78	60	-1.3	Mus musculus keratin 17 (Krt17), mRNA.
Chmp4b	3710.1	3307.7	3498.6	1.05771	3632.1	3707.8	1.02084	5027.7	3867.5	-1.29999	Mus musculus chromatin modifying protein 4B (Chmp4b), mRNA.
St3gal1	98.3	94.2	99.2	1.05308	178.4	172.5	-1.0342	304.7	234.4	-1.29991	Mus musculus ST3 beta-galactoside alpha-2,3-sialyltransferase 1 (St3gal1), mRNA.
Jmjd5	137	144.5	140.3	-1.02994	134.8	122.2	-1.10311	172.4	132.7	-1.29917	Mus musculus jumonji domain containing 5 (Jmjd5), mRNA.
Usp12	89.7	89.7	91.6	1.02118	84.1	92.1	1.09512	109.9	84.6	-1.29905	Mus musculus ubiquitin specific peptidase 12 (Usp12), mRNA.
Txnl4b	299.5	258.6	256.4	-1.00858	200.4	194.3	-1.03139	253.3	195	-1.29897	Mus musculus thioredoxin-like 4B (Txnl4b), mRNA.
Gcnt1	285.1	287.8	272.5	-1.05615	203.9	203.2	-1.00344	195.2	150.3	-1.29874	Mus musculus glucosaminyl (N-acetyl) transferase 1, core 2 (Gcnt1), mRNA.
Tas2r125	68.5	65.1	66.7	1.02458	78.4	71.1	-1.10267	73.5	56.6	-1.29859	Mus musculus taste receptor, type 2, member 125 (Tas2r125), mRNA.
Abhd14a	87.1	96.7	80.6	-1.19975	94.1	87	-1.08161	115.1	88.7	-1.29763	Mus musculus abhydrolase domain containing 14A (Abhd14a), mRNA.
Arglu1	1316.4	1350.5	1229.6	-1.09832	1252.6	1282.5	1.02387	1596.7	1230.7	-1.29739	Mus musculus arginine and glutamate rich 1 (Arglu1), mRNA.
Tle3	75.1	82.4	76.1	-1.08279	74.9	69	-1.08551	97.3	75	-1.29733	Mus musculus transducin-like enhancer of split 3, homolog of Drosophila E(spl) (Tle3), transcript variant 3, mRNA.
6330409N04Rik	232.2	238.1	229	-1.03974	320.7	369.7	1.15279	519.8	400.7	-1.29723	Mus musculus RIKEN cDNA 6330409N04 gene (6330409N04Rik), mRNA.
Itfg2	239.5	229.7	235.5	1.02525	212.4	241.3	1.13606	251.5	193.9	-1.29706	Mus musculus integrin alpha FG-GAP repeat containing 2 (Itfg2), mRNA.
Pi4k2b	186.3	191.8	201.5	1.05057	207.2	217.1	1.04778	266.9	205.8	-1.29689	Mus musculus phosphatidylinositol 4-kinase type 2 beta (Pi4k2b), transcript variant 2, mRNA.
Pex26	114.2	99.6	90.2	-1.10421	68.3	72.8	1.06589	119	91.8	-1.2963	Mus musculus peroxisome biogenesis factor 26 (Pex26), mRNA.
Sgms2	59.6	60.1	65.1	1.08319	98	111	1.13265	148.1	114.3	-1.29571	Mus musculus sphingomyelin synthase 2 (Sgms2), mRNA.
Krt5	77.2	94.8	72.9	-1.30041	71.3	84.9	1.19074	82.9	64	-1.29531	Mus musculus keratin 5 (Krt5), mRNA.
Upf3a	175.2	167.6	186.1	1.11038	193	201.7	1.04508	269.4	208	-1.29519	Mus musculus UPF3 regulator of nonsense transcripts homolog A (yeast) (Upf3a), mRNA.
Cxcl10	3833.8	6383.2	6656.7	1.04285	15014.5	10270.6	-1.46189	26552.2	20502.5	-1.29507	Mus musculus chemokine (C-X-C motif) ligand 10 (Cxcl10), mRNA.
Rap2c	862.5	912.9	905.9	-1.00773	1000.6	1092.6	1.09194	1440.6	1112.9	-1.29446	Mus musculus RAP2C, member of RAS oncogene family (Rap2c), mRNA.
Rasgef1b	129.6	180.3	172.4	-1.04582	185.7	214.1	1.15293	238.8	184.5	-1.29431	Mus musculus RasGEF domain family, member 1B (Rasgef1b), transcript variant 2, mRNA.
Upf2	1091	1063.4	979.1	-1.0861	677.4	725.6	1.07115	1070.6	827.3	-1.29409	Mus musculus UPF2 regulator of nonsense transcripts homolog (yeast) (Upf2), mRNA.
Aspn	78.9	73.1	69.2	-1.05636	69.8	77.2	1.10602	86.7	67	-1.29403	Mus musculus asporin (Aspn), mRNA.
Mfap3	688	547.8	553.1	1.00968	384.8	432	1.12266	599.7	463.7	-1.29329	Mus musculus microfibrillar-associated protein 3 (Mfap3), transcript variant 1, mRNA.
Plekha2	4233.1	4586.1	4360.2	-1.05181	2870.9	2954	1.02895	4204.7	3251.3	-1.29324	Mus musculus pleckstrin homology domain-containing, family A (phosphoinositide binding specific) member 2 (Plekha2), mRNA.
H2-K1	1544	1511.5	1617	1.0698	1884.7	2098.1	1.11323	2799.4	2164.8	-1.29314	Mus musculus histocompatibility 2, K1, K region (H2-K1), mRNA.
Zfp628	110.2	120	124.6	1.03833	109.6	116.3	1.06113	139.4	107.8	-1.29314	Mus musculus zinc finger protein 628 (Zfp628), mRNA.
Dhrsx	798.1	796.7	818.8	1.02774	986.6	1176.2	1.19218	1350.8	1044.8	-1.29288
Myrip	84.9	83.2	70	-1.18857	81.8	87.1	1.06479	90.1	69.7	-1.29268	Mus musculus myosin VIIA and Rab interacting protein (Myrip), mRNA.
Gpr18	79.3	79	76.9	-1.02731	85	84.9	-1.00118	131.3	101.6	-1.29232	Mus musculus G protein-coupled receptor 18 (Gpr18), mRNA.
2610036D13Rik	199.1	188.3	193.9	1.02974	149.3	151.8	1.01674	190.2	147.2	-1.29212	Mus musculus RIKEN cDNA 2610036D13 gene (2610036D13Rik), mRNA.
Olfr1199	66.4	67.4	69.1	1.02522	62.4	66.5	1.06571	78.8	61	-1.2918	Mus musculus olfactory receptor 1199 (Olfr1199), mRNA.
Timeless	400.1	392.8	377.4	-1.04081	283.8	259.3	-1.09449	336.9	260.8	-1.29179	Mus musculus timeless homolog (Drosophila) (Timeless), transcript variant 2, mRNA.
Armc7	133.1	112.5	117.7	1.04622	151.8	151.6	-1.00132	182.9	141.6	-1.29167	Mus musculus armadillo repeat containing 7 (Armc7), mRNA.
Piwil2	134.5	121.6	135.1	1.11102	126.3	134.6	1.06572	179.4	138.9	-1.29158	Mus musculus piwi-like homolog 2 (Drosophila) (Piwil2), mRNA.
V1ra8	71.6	73.2	67.4	-1.08605	80.1	71.4	-1.12185	76.2	59	-1.29153	Mus musculus vomeronasal 1 receptor, A8 (V1ra8), mRNA.
E130014J05Rik	104.3	105	94.9	-1.10643	99.6	117.5	1.17972	163.7	126.8	-1.29101
Hoxb7	1135.1	1058.6	1084.3	1.02428	738.1	668.2	-1.10461	1102.7	854.2	-1.29092	Mus musculus homeo box B7 (Hoxb7), mRNA.
Arg2	62.5	63.3	59.9	-1.05676	70.8	86	1.21469	96.4	74.7	-1.2905	Mus musculus arginase type II (Arg2), mRNA.
Trim26	1345	1677	1470	-1.14082	1537.1	1724.8	1.12211	2296.2	1781.4	-1.28899	Mus musculus tripartite motif-containing 26 (Trim26), transcript variant 1, mRNA.
2310021P13Rik	151.2	161.6	154.5	-1.04595	145.5	169.8	1.16701	192.6	149.5	-1.28829
Agpat9	135.4	158.7	174.2	1.09767	199	228.5	1.14824	252.5	196	-1.28827	Mus musculus 1-acylglycerol-3-phosphate O-acyltransferase 9 (Agpat9), transcript variant 1, mRNA.
Dpep2	1182.3	1212.9	1225	1.00998	1480.4	1445.2	-1.02436	2207.4	1713.5	-1.28824	Mus musculus dipeptidase 2 (Dpep2), mRNA.
Asah2	215.1	227.7	218.7	-1.04115	206.6	191.9	-1.0766	253.1	196.5	-1.28804	Mus musculus N-acylsphingosine amidohydrolase 2 (Asah2), mRNA.
Ddx24	1317.8	1396.8	1400.3	1.00251	1357.7	1469.2	1.08212	1662.4	1290.9	-1.28778	Mus musculus DEAD (Asp-Glu-Ala-Asp) box polypeptide 24 (Ddx24), mRNA.
Dll1	104.1	102.2	110.7	1.08317	105.1	120.3	1.14462	137.9	107.1	-1.28758	Mus musculus delta-like 1 (Drosophila) (Dll1), mRNA.
1810008A18Rik	467.1	433.3	403.8	-1.07306	396.1	412.4	1.04115	528.9	410.8	-1.28749	Mus musculus RIKEN cDNA 1810008A18 gene (1810008A18Rik), mRNA.
Rab39b	77.1	77.4	83.4	1.07752	89.6	88.4	-1.01357	93.6	72.7	-1.28748	Mus musculus RAB39B, member RAS oncogene family (Rab39b), mRNA.
Zfp90	167.9	158.4	157.1	-1.00827	110.8	124.2	1.12094	188.2	146.2	-1.28728
Lgals3bp	8034.8	8131.4	8771.2	1.07868	7983.8	8782.2	1.1	10825.4	8414.2	-1.28656	Mus musculus lectin, galactoside-binding, soluble, 3 binding protein (Lgals3bp), mRNA.
Tapbpl	120.7	117.3	129.8	1.10656	126.3	126.2	-1.00079	158.6	123.3	-1.28629	Mus musculus TAP binding protein-like (Tapbpl), mRNA.
Znhit2	624.4	531	569.6	1.07269	487.9	508.6	1.04243	719	559	-1.28623	Mus musculus zinc finger, HIT domain containing 2 (Znhit2), mRNA.
B4galt5	95.3	82.9	105.1	1.26779	100.1	92.4	-1.08333	126.3	98.2	-1.28615	Mus musculus UDP-Gal:betaGlcNAc beta 1,4-galactosyltransferase, polypeptide 5 (B4galt5), mRNA.
1200003I07Rik	144.9	185.9	188.5	1.01399	147.3	157.2	1.06721	186.2	144.8	-1.28591	Mus musculus RIKEN cDNA 1200003I07 gene (1200003I07Rik), transcript variant 3, mRNA.
Bud13	485.8	545.6	527.8	-1.03372	643.9	467.5	-1.37733	707.7	550.5	-1.28556	Mus musculus BUD13 homolog (yeast) (Bud13), mRNA.
Psen1	377.8	407.9	398.6	-1.02333	366.6	433.4	1.18221	430.6	335	-1.28537
Nudcd1	83.5	75.3	77.3	1.02656	80.3	74.2	-1.08221	80.2	62.4	-1.28526	Mus musculus NudC domain containing 1 (Nudcd1), mRNA.
Ctrl	90.2	98.7	94.8	-1.04114	88.9	103.5	1.16423	106.5	82.9	-1.28468	Mus musculus chymotrypsin-like (Ctrl), mRNA.
Sfi1	217.2	189.5	174.2	-1.08783	142.1	138.8	-1.02378	229.7	178.9	-1.28396	Mus musculus Sfi1 homolog, spindle assembly associated (yeast) (Sfi1), mRNA.
Kcne2	84.3	79.2	77.5	-1.02194	94.2	74.3	-1.26783	86.4	67.3	-1.2838	Mus musculus potassium voltage-gated channel, Isk-related subfamily, gene 2 (Kcne2), mRNA.
Surf6	111.9	99.6	104.9	1.05321	95	102.4	1.07789	123.1	95.9	-1.28363	Mus musculus surfeit gene 6 (Surf6), mRNA.
Arhgap26	87.1	92.2	90.2	-1.02217	95.2	103.5	1.08718	105.6	82.3	-1.28311	Mus musculus Rho GTPase activating protein 26 (Arhgap26), mRNA.
AW061290	111.3	108.7	116.7	1.0736	127.4	146.5	1.14992	188.6	147	-1.28299	Mus musculus expressed sequence AW061290 (AW061290), mRNA.
Kars	743.3	684.2	676.7	-1.01108	799.7	697	-1.14735	961.7	749.7	-1.28278	Mus musculus lysyl-tRNA synthetase (Kars), mRNA.
Man2a1	621.8	594.1	658.8	1.1089	613.4	656.7	1.07059	693.6	540.8	-1.28254	Mus musculus mannosidase 2, alpha 1 (Man2a1), mRNA.
Tpst1	3037.7	2945.9	3091.4	1.04939	2875.4	3005.2	1.04514	3307.7	2579.2	-1.28245	Mus musculus protein-tyrosine sulfotransferase 1 (Tpst1), transcript variant 2, mRNA.
Cops7b	310.5	285.3	287.4	1.00736	304.4	297.8	-1.02216	397.1	309.7	-1.28221	Mus musculus COP9 (constitutive photomorphogenic) homolog, subunit 7b (Arabidopsis thaliana) (Cops7b), mRNA.
Tbc1d1	171.8	180.7	171.9	-1.05119	259.4	258.2	-1.00465	380.9	297.1	-1.28206	Mus musculus TBC1 domain family, member 1 (Tbc1d1), mRNA.
Hspa12a	83.5	79.3	79.2	-1.00126	90.5	75.4	-1.20027	95.1	74.2	-1.28167	Mus musculus heat shock protein 12A (Hspa12a), mRNA.
Ell3	91.6	91.3	90	-1.01444	107.3	85.6	-1.2535	122	95.2	-1.28151	Mus musculus elongation factor RNA polymerase II-like 3 (Ell3), mRNA.
Gse1	120.4	128.5	118.6	-1.08347	116.8	119.1	1.01969	139.4	108.8	-1.28125	Mus musculus genetic suppressor element 1 (Gse1), mRNA.
Ifi202b	1679	1874.6	1791.3	-1.0465	1999.7	2244.4	1.12237	3039.4	2373.4	-1.28061	Mus musculus interferon activated gene 202B (Ifi202b), mRNA.
Clec16a	101.9	101.2	103.3	1.02075	98.8	104.8	1.06073	107.8	84.2	-1.28029	Mus musculus C-type lectin domain family 16, member A (Clec16a), mRNA.
Ncoa5	653.8	732.8	718.8	-1.01948	733.8	781.6	1.06514	943	736.8	-1.27986	Mus musculus nuclear receptor coactivator 5 (Ncoa5), mRNA.
Ift172	737.6	687.1	723.1	1.05239	707.4	714.2	1.00961	941	735.3	-1.27975	Mus musculus intraflagellar transport 172 homolog (Chlamydomonas) (Ift172), mRNA.
Leng1	100.8	113	108.5	-1.04147	97	89	-1.08989	109.4	85.5	-1.27953	Mus musculus leukocyte receptor cluster (LRC) member 1 (Leng1), mRNA.
Cyp2c65	66.7	62.1	67.1	1.08052	70.3	59.2	-1.1875	71	55.5	-1.27928	Mus musculus cytochrome P450, family 2, subfamily c, polypeptide 65 (Cyp2c65), mRNA.
Mical2	112.2	124.3	122.1	-1.01802	137.3	142.2	1.03569	160.8	125.7	-1.27924	Mus musculus microtubule associated monoxygenase, calponin and LIM domain containing 2 (Mical2), mRNA.
Cd300a	116.4	102.5	111	1.08293	94.4	90.2	-1.04656	130.6	102.1	-1.27914	Mus musculus CD300A antigen (Cd300a), mRNA.
Dhx37	251.8	237.2	256.4	1.08094	247.6	236.7	-1.04605	250.1	195.6	-1.27863	Mus musculus DEAH (Asp-Glu-Ala-His) box polypeptide 37 (Dhx37), mRNA.
1700018F24Rik	70.3	68.6	69.9	1.01895	65.4	76.9	1.17584	90.5	70.8	-1.27825	Mus musculus RIKEN cDNA 1700018F24 gene (1700018F24Rik), mRNA.
Iapp	89.4	91.5	99.2	1.08415	90.5	83.9	-1.07867	114.5	89.6	-1.2779	Mus musculus islet amyloid polypeptide (Iapp), mRNA.
Card11	75	75.9	71.9	-1.05563	78.2	74.5	-1.04966	76.8	60.1	-1.27787	Mus musculus caspase recruitment domain family, member 11 (Card11), mRNA.
Dedd	331.6	327.4	315.3	-1.03838	351.4	345	-1.01855	460	360.1	-1.27742	Mus musculus death effector domain-containing (Dedd), mRNA.
Upf1	215.8	208.9	189.8	-1.10063	177.2	195	1.10045	246.9	193.3	-1.27729	Mus musculus UPF1 regulator of nonsense transcripts homolog (yeast) (Upf1), mRNA.
Abr	241.8	252.6	232	-1.08879	242.5	267.9	1.10474	412.9	323.3	-1.27714	Mus musculus active BCR-related gene (Abr), transcript variant 1, mRNA.
Irgq	139.3	129.5	133.4	1.03012	112.4	111.4	-1.00898	137	107.3	-1.27679	Mus musculus immunity-related GTPase family, Q (Irgq), mRNA.
Dennd2a	150.7	149.5	146.2	-1.02257	120.4	143.7	1.19352	175.5	137.5	-1.27636	Mus musculus DENN/MADD domain containing 2A (Dennd2a), mRNA.
Tor1b	210.2	212.1	199.2	-1.06476	193.1	173.9	-1.11041	289.4	226.8	-1.27601	Mus musculus torsin family 1, member B (Tor1b), mRNA.
Olfr560	70.9	65.8	69.6	1.05775	65.7	70.8	1.07763	81.4	63.8	-1.27586
Ssr1	63.7	64.6	71.2	1.10217	68.2	61.2	-1.11438	65.7	51.5	-1.27573	Mus musculus signal sequence receptor, alpha (Ssr1), mRNA.
BC046331	400	388.5	374.5	-1.03738	362.9	395.8	1.09066	542	424.9	-1.27559	Mus musculus cDNA sequence BC046331 (BC046331), mRNA.
Uhrf1bp1	124	123.1	122.1	-1.00819	102.3	105.3	1.02933	105.1	82.4	-1.27549	Mus musculus UHRF1 (ICBP90) binding protein 1 (Uhrf1bp1), mRNA.
Fcgr2b	192	210.9	201.2	-1.04821	225.5	212.9	-1.05918	289.9	227.3	-1.27541	Mus musculus Fc receptor, IgG, low affinity IIb (Fcgr2b), transcript variant 1, mRNA.
Ints3	323.4	308.4	321.7	1.04313	254.6	264.3	1.0381	293.4	230.1	-1.2751	Mus musculus integrator complex subunit 3 (Ints3), transcript variant 1, mRNA.
Bfar	228.1	213.4	216.4	1.01406	232.3	218.9	-1.06122	293.5	230.2	-1.27498	Mus musculus bifunctional apoptosis regulator (Bfar), mRNA.
4931406P16Rik	434.2	449.8	458.4	1.01912	470.8	498.8	1.05947	549.8	431.3	-1.27475	Mus musculus RIKEN cDNA 4931406P16 gene (4931406P16Rik), mRNA.
Trp53inp2	101.9	105.2	108.2	1.02852	180.8	202.7	1.12113	190.7	149.6	-1.27473	Mus musculus transformation related protein 53 inducible nuclear protein 2 (Trp53inp2), mRNA.
LOC100038882	8608.2	7847.7	8414.2	1.07219	11893.6	11460.6	-1.03778	17757.3	13936.5	-1.27416	PREDICTED: Mus musculus hypothetical protein LOC100038882 (LOC100038882), mRNA.
Eif2ak1	596.9	532.1	559.7	1.05187	469.4	506.3	1.07861	564.7	443.2	-1.27414
Gm1821	20660.2	21221.7	22493.5	1.05993	12842.8	16104.1	1.25394	16816.9	13199.8	-1.27403	Mus musculus gene model 1821, (NCBI) (Gm1821), non-coding RNA. XM_899826
Nod2	107.3	106.4	107.4	1.0094	171.5	141.3	-1.21373	206.9	162.4	-1.27401	Mus musculus nucleotide-binding oligomerization domain containing 2 (Nod2), mRNA.
Prl3b1	61.9	63.2	64	1.01266	60.4	65.7	1.08775	73	57.3	-1.274	Mus musculus prolactin family 3, subfamily b, member 1 (Prl3b1), mRNA.
Zfp213	109.7	112.5	110.2	-1.02087	99.8	100.7	1.00902	127.9	100.4	-1.2739	Mus musculus zinc finger protein 213 (Zfp213), mRNA.
Ogt	469	397.1	373.7	-1.06262	350.8	347.6	-1.00921	485	380.8	-1.27363	Mus musculus O-linked N-acetylglucosamine (GlcNAc) transferase (UDP-N-acetylglucosamine:polypeptide-N-acetylglucosaminyl transferase) (Ogt), mRNA.
Ugt2b35	70.2	67.4	67.9	1.00742	75	70.6	-1.06232	77.3	60.7	-1.27348	Mus musculus UDP glucuronosyltransferase 2 family, polypeptide B35 (Ugt2b35), mRNA.
Fbxl8	132.4	121.2	113.6	-1.0669	119	111.6	-1.06631	133.7	105	-1.27333	Mus musculus F-box and leucine-rich repeat protein 8 (Fbxl8), mRNA.
Drd3	70	81.3	70.5	-1.15319	75.5	79.2	1.04901	89.2	70.1	-1.27247	Mus musculus dopamine receptor 3 (Drd3), mRNA.
Wdr44	87.1	92.9	78.5	-1.18344	86.2	83.1	-1.0373	86	67.6	-1.27219	Mus musculus WD repeat domain 44 (Wdr44), mRNA. XM_981046 XM_981082 XM_981124 XM_981163
Lrp11	253.5	250.3	242.2	-1.03344	235.8	262.7	1.11408	344.5	270.8	-1.27216	Mus musculus low density lipoprotein receptor-related protein 11 (Lrp11), mRNA.
Gsdmdc1	1593.4	1491.8	1460.7	-1.02129	1614.3	1581.6	-1.02068	2452.7	1928	-1.27215	Mus musculus gasdermin domain containing 1 (Gsdmdc1), mRNA.
Adfp	569.5	572.3	612.8	1.07077	767.8	807.2	1.05132	1017.3	799.7	-1.2721	Mus musculus adipose differentiation related protein (Adfp), mRNA.
Tie1	70.5	64.8	71.4	1.10185	69.4	67.9	-1.02209	82.3	64.7	-1.27202	Mus musculus tyrosine kinase receptor 1 (Tie1), mRNA.
Prnp	1022.9	1057.9	1086.6	1.02713	995.9	1003	1.00713	1937.2	1523.2	-1.2718	Mus musculus prion protein (Prnp), mRNA.
4930453N24Rik	1971.5	1850.5	1897.1	1.02518	2092.2	1887.5	-1.10845	2610.6	2052.7	-1.27179	Mus musculus RIKEN cDNA 4930453N24 gene (4930453N24Rik), mRNA.
EG328280	66	69.8	71.7	1.02722	61.3	69.3	1.13051	73	57.4	-1.27178	Mus musculus predicted gene, EG328280 (EG328280), mRNA.
2900073G15Rik	236.9	247.4	249.1	1.00687	318.9	325.3	1.02007	358.1	281.6	-1.27166
EG245297	166.5	181.1	174.8	-1.03604	179	179.4	1.00223	243.5	191.5	-1.27154	Mus musculus predicted gene, EG245297 (EG245297), mRNA.
1300018I05Rik	3980.4	3857.7	4002.8	1.03761	3223.2	3883.8	1.20495	4266.1	3355.5	-1.27138	Mus musculus RIKEN cDNA 1300018I05 gene (1300018I05Rik), mRNA.
Snhg11	84.8	83	95	1.14458	76.2	83.1	1.09055	104.5	82.2	-1.27129	Mus musculus small nucleolar RNA host gene 11 (non-protein coding) (Snhg11), mRNA.
Etv6	143.3	154.4	152.6	-1.0118	166.1	159.9	-1.03877	256.6	201.9	-1.27093	Mus musculus ets variant gene 6 (TEL oncogene) (Etv6), mRNA.
Xpo6	493.9	468.9	471	1.00448	448.1	455.7	1.01696	593.9	467.3	-1.27092	Mus musculus exportin 6 (Xpo6), mRNA.
Gpx6	72	72.1	69.9	-1.03147	69.3	68	-1.01912	86.4	68	-1.27059	Mus musculus glutathione peroxidase 6 (Gpx6), mRNA.
Atf5	1745.3	1673	1468.8	-1.13903	1802.4	1850.5	1.02669	1651.8	1300.3	-1.27032	Mus musculus activating transcription factor 5 (Atf5), mRNA.
Acta2	87.5	87.1	86.2	-1.01044	88.4	93.8	1.06109	110	86.6	-1.27021	Mus musculus actin, alpha 2, smooth muscle, aorta (Acta2), mRNA.
Ifi35	1580.5	1626.6	1608.8	-1.01106	1712.7	1629.2	-1.05125	2452.1	1930.6	-1.27012	Mus musculus interferon-induced protein 35 (Ifi35), mRNA.
D030070L09Rik	317	335.6	324.5	-1.03421	325.6	387.3	1.1895	396.6	312.3	-1.26993	Mus musculus RIKEN cDNA D030070L09 gene (D030070L09Rik), mRNA.
Lrrk2	233.2	234.5	238.8	1.01834	226.7	259.8	1.14601	266.9	210.2	-1.26974	Mus musculus leucine-rich repeat kinase 2 (Lrrk2), mRNA.
Pla2g15	963.4	825.8	802.4	-1.02916	361.5	335.5	-1.0775	618.6	487.3	-1.26944	Mus musculus phospholipase A2, group XV (Pla2g15), mRNA.
Gemin7	303.5	283.6	282.4	-1.00425	293.3	267.9	-1.09481	420.5	331.3	-1.26924	Mus musculus gem (nuclear organelle) associated protein 7 (Gemin7), mRNA.
Krt8	99.8	89.7	92.7	1.03344	96.1	101.8	1.05931	116	91.4	-1.26915	Mus musculus keratin 8 (Krt8), mRNA.
Gbl	530.6	411.1	398.5	-1.03162	330.7	369.2	1.11642	492.9	388.4	-1.26905	Mus musculus G protein beta subunit-like (Gbl), mRNA.
4921528G01Rik	65.9	72.6	64.1	-1.13261	76.5	70.4	-1.08665	83.5	65.8	-1.269
Kctd12	144	155.7	139.4	-1.11693	253.5	264.5	1.04339	373.2	294.1	-1.26896	Mus musculus potassium channel tetramerisation domain containing 12 (Kctd12), mRNA.
Camk2d	84.7	88.3	92.8	1.05096	107.1	114.1	1.06536	149.2	117.6	-1.26871	Mus musculus calcium/calmodulin-dependent protein kinase II, delta (Camk2d), transcript variant 1, mRNA.
Gtpbp5	114.2	95.2	99.4	1.04412	102.4	101.9	-1.00491	134.6	106.1	-1.26861	Mus musculus GTP binding protein 5 (Gtpbp5), transcript variant 3, mRNA.
Treh	72.2	75.1	85.3	1.13582	72.9	72.1	-1.0111	89.8	70.8	-1.26836	Mus musculus trehalase (brush-border membrane glycoprotein) (Treh), mRNA.
Ctnnb1	1734.6	1738.2	1645.8	-1.05614	1634.8	2173	1.32921	2061.2	1625.8	-1.26781	Mus musculus catenin (cadherin associated protein), beta 1 (Ctnnb1), mRNA.
Chd8	453.6	424.9	465.5	1.09555	313.6	274.5	-1.14244	476.3	375.7	-1.26777	Mus musculus chromodomain helicase DNA binding protein 8 (Chd8), mRNA.
Zcchc4	95	91.3	89.3	-1.0224	88.3	87.2	-1.01261	117	92.3	-1.26761	Mus musculus zinc finger, CCHC domain containing 4 (Zcchc4), mRNA. XM_923669 XM_923685 XM_923691 XM_977051 XM_977085 XM_977122 XM_977192
Fam110b	83.1	86.4	89.9	1.04051	81.2	80	-1.015	84.8	66.9	-1.26756	Mus musculus family with sequence similarity 110, member B (Fam110b), mRNA.
Nlgn2	135.7	131.2	135.5	1.03277	117	138.4	1.18291	175.8	138.7	-1.26748	Mus musculus neuroligin 2 (Nlgn2), mRNA.
Olfr724	99.8	96.5	110	1.1399	100.1	103.3	1.03197	125.6	99.1	-1.26741	Mus musculus olfactory receptor 724 (Olfr724), mRNA.
Rbbp5	259.3	244.7	237.7	-1.02945	174.8	188.3	1.07723	246.7	194.7	-1.26708	Mus musculus retinoblastoma binding protein 5 (Rbbp5), mRNA.
Zswim3	159.7	126.1	131.9	1.046	101.9	97.6	-1.04406	144.8	114.3	-1.26684	Mus musculus zinc finger, SWIM domain containing 3 (Zswim3), mRNA.
Pigt	338.8	289.7	320.5	1.10632	342.1	314	-1.08949	407	321.3	-1.26673	Mus musculus phosphatidylinositol glycan anchor biosynthesis, class T (Pigt), mRNA. XM_922599
Nf1	71.8	72.2	65.8	-1.09726	69.6	66.7	-1.04348	77.9	61.5	-1.26667
Ncam2	65.9	62.7	67.5	1.07656	54.5	63.9	1.17248	76	60	-1.26667	Mus musculus neural cell adhesion molecule 2 (Ncam2), mRNA.
LOC100046355	62.4	64.5	60.1	-1.07321	61.3	63.1	1.02936	65.1	51.4	-1.26654	PREDICTED: Mus musculus similar to Collagen-like tail subunit (single strand of homotrimer) of asymmetric acetylcholinesterase, transcript variant 1 (LOC100046355), mRNA.
Pik3r3	139.9	152.5	140.5	-1.08541	123.5	138.4	1.12065	155.9	123.1	-1.26645	Mus musculus phosphatidylinositol 3 kinase, regulatory subunit, polypeptide 3 (p55) (Pik3r3), mRNA.
I830077J02Rik	139.7	152	158.5	1.04276	143	145.9	1.02028	171.6	135.5	-1.26642	Mus musculus RIKEN cDNA I830077J02 gene (I830077J02Rik), mRNA.
Cenpj	110.2	114.3	108.2	-1.05638	95.4	102.6	1.07547	126.5	99.9	-1.26627	Mus musculus centromere protein J (Cenpj), mRNA.
Rtn4r	76.4	90.9	78.6	-1.15649	80.5	91.6	1.13789	103.7	81.9	-1.26618	Mus musculus reticulon 4 receptor (Rtn4r), mRNA.
Nin	148.5	140.6	146.4	1.04125	132.2	135.8	1.02723	173.2	136.8	-1.26608	Mus musculus ninein (Nin), transcript variant 2, mRNA.
Spnb3	79.8	88.6	74.5	-1.18926	85.2	83.9	-1.01549	129.5	102.3	-1.26588	Mus musculus spectrin beta 3 (Spnb3), mRNA.
Impg1	62.7	63.7	66.3	1.04082	71.3	61.8	-1.15372	72.4	57.2	-1.26573	Mus musculus interphotoreceptor matrix proteoglycan 1 (Impg1), mRNA.
Gnb4	81.3	82.6	84.8	1.02663	83.8	82.5	-1.01576	109.6	86.6	-1.26559	Mus musculus guanine nucleotide binding protein (G protein), beta 4 (Gnb4), mRNA.
Id4	62.9	58.7	62.7	1.06814	70	59.7	-1.17253	65.3	51.6	-1.2655	Mus musculus inhibitor of DNA binding 4 (Id4), mRNA.
Ikbkg	179.9	166.5	169	1.01502	167.6	156.5	-1.07093	218	172.3	-1.26524	Mus musculus inhibitor of kappaB kinase gamma (Ikbkg), transcript variant 2, mRNA.
Perld1	87	90.7	85.4	-1.06206	95.4	84.7	-1.12633	82.2	65	-1.26462	Mus musculus per1-like domain containing 1 (Perld1), mRNA. XM_923653
Flot1	367.5	362.7	376.4	1.03777	372.8	388.7	1.04265	452.7	358	-1.26453	Mus musculus flotillin 1 (Flot1), mRNA.
Mknk2	492.5	479.3	499.8	1.04277	509.7	758.9	1.48892	501.6	396.7	-1.26443	Mus musculus MAP kinase-interacting serine/threonine kinase 2 (Mknk2), mRNA.
Arid5b	101.3	99.4	84.3	-1.17912	86.7	84	-1.03214	109.1	86.3	-1.26419	Mus musculus AT rich interactive domain 5B (MRF1-like) (Arid5b), mRNA.
Alkbh4	116.5	84.7	100.5	1.18654	100.8	100.3	-1.00499	137.9	109.1	-1.26398	Mus musculus alkB, alkylation repair homolog 4 (E. coli) (Alkbh4), mRNA. XM_925313 XM_925314 XM_925316 XM_979058 XM_979099 XM_979130
LOC100046855	170	147.7	150	1.01557	124.9	122.5	-1.01959	136.5	108	-1.26389	PREDICTED: Mus musculus similar to BKLF (LOC100046855), mRNA.
1600002K03Rik	453.2	440.8	458.6	1.04038	443.8	473	1.0658	578.3	457.6	-1.26377	Mus musculus RIKEN cDNA 1600002K03 gene (1600002K03Rik), mRNA.
Zfand3	1186.5	1201.2	1235.4	1.02847	912.3	1050.5	1.15149	1460.8	1156.2	-1.26345	Mus musculus zinc finger, AN1-type domain 3 (Zfand3), mRNA.
Ccrn4l	323.3	352.5	358.3	1.01645	1141	1105.6	-1.03202	1425.9	1128.6	-1.26342	Mus musculus CCR4 carbon catabolite repression 4-like (S. cerevisiae) (Ccrn4l), mRNA.
Prkab1	429.5	388.6	389.9	1.00335	329.4	358.3	1.08774	408.8	323.7	-1.2629	Mus musculus protein kinase, AMP-activated, beta 1 non-catalytic subunit (Prkab1), mRNA.
Rac1	370.2	322.6	349.4	1.08308	381.5	357.6	-1.06683	414	327.9	-1.26258	Mus musculus RAS-related C3 botulinum substrate 1 (Rac1), mRNA.
Fancc	84	81.6	82	1.0049	84.6	82.6	-1.02421	95.8	75.9	-1.26219	Mus musculus Fanconi anemia, complementation group C (Fancc), transcript variant 1, mRNA.
Pard3b	80.1	66.6	72.9	1.09459	80.5	69.9	-1.15165	86.2	68.3	-1.26208	Mus musculus par-3 partitioning defective 3 homolog B (C. elegans) (Pard3b), mRNA.
Nol3	73.4	77.1	72.6	-1.06198	75.1	70.7	-1.06223	86.7	68.7	-1.26201	Mus musculus nucleolar protein 3 (apoptosis repressor with CARD domain) (Nol3), mRNA.
Ddx6	143.1	149.7	145.7	-1.02745	181.3	174.6	-1.03837	210.1	166.5	-1.26186	Mus musculus DEAD (Asp-Glu-Ala-Asp) box polypeptide 6 (Ddx6), mRNA.
EG434171	93.7	107.8	88	-1.225	84.5	90.4	1.06982	101.7	80.6	-1.26179	Mus musculus predicted gene, EG434171 (EG434171), mRNA.
Adamts4	67.5	64.4	64.7	1.00466	81.2	75.7	-1.07266	139.3	110.4	-1.26178
Casp8	1098.4	1218.7	1165.3	-1.04583	1088.7	1056.4	-1.03058	1575.8	1249.2	-1.26145	Mus musculus caspase 8 (Casp8), transcript variant 2, mRNA.
Vcp	6850.5	7151.2	7023.4	-1.0182	6420.6	6665.5	1.03814	7264.7	5760.3	-1.26117	Mus musculus valosin containing protein (Vcp), mRNA.
Leprel1	71.8	76	68.1	-1.11601	69.6	82.3	1.18247	90.8	72	-1.26111	Mus musculus leprecan-like 1 (Leprel1), mRNA.
Lmbr1l	124.7	101.9	127.6	1.25221	112.6	99.6	-1.13052	123.7	98.1	-1.26096	Mus musculus limb region 1 like (Lmbr1l), mRNA.
Olfr212	60.1	70.6	70.3	-1.00427	64.7	62.9	-1.02862	75.4	59.8	-1.26087	Mus musculus olfactory receptor 212 (Olfr212), mRNA.
Rbm19	254	244.9	242	-1.01198	284.4	261.7	-1.08674	305.6	242.4	-1.26073	Mus musculus RNA binding motif protein 19 (Rbm19), mRNA.
Crk	617.8	585.2	563.5	-1.03851	663.6	635.4	-1.04438	712.8	565.5	-1.26048	Mus musculus v-crk sarcoma virus CT10 oncogene homolog (avian) (Crk), mRNA.
Rnf185	201.4	200.5	183.7	-1.09145	168.8	202.7	1.20083	216.8	172	-1.26047	Mus musculus ring finger protein 185 (Rnf185), mRNA.
Abt1	73	70.6	74.8	1.05949	84.3	76.2	-1.1063	78.4	62.2	-1.26045	Mus musculus activator of basal transcription (Abt1), mRNA.
Tmem131	132.6	120.4	124.9	1.03738	119.5	123.2	1.03096	168	133.3	-1.26032	Mus musculus transmembrane protein 131 (Tmem131), mRNA.
Pum1	166.5	159.4	164.9	1.0345	138.8	146.6	1.0562	173.9	138	-1.26014	Mus musculus pumilio 1 (Drosophila) (Pum1), mRNA.
6530421E24Rik	83.1	85.4	102	1.19438	86.1	99	1.14983	94.5	75	-1.26
Cd47	910.9	812.4	850.1	1.04641	691.8	725.1	1.04814	814.3	646.4	-1.25975	Mus musculus CD47 antigen (Rh-related antigen, integrin-associated signal transducer) (Cd47), mRNA.
Med23	267.9	276.5	269.3	-1.02674	231.7	261	1.12646	292.1	231.9	-1.25959	Mus musculus mediator complex subunit 23 (Med23), mRNA.
Abhd1	223.9	209.2	222.7	1.06453	249.4	274.6	1.10104	358.7	284.8	-1.25948	Mus musculus abhydrolase domain containing 1 (Abhd1), transcribed RNA.
Map3k1	701.8	606.4	671.7	1.10768	231.1	186.5	-1.23914	251.5	199.7	-1.25939	Mus musculus mitogen-activated protein kinase kinase kinase 1 (Map3k1), mRNA.
1500012F01Rik	6216.4	4030.8	3726.2	-1.08175	2254.8	2527.7	1.12103	3751.8	2979.9	-1.25904	Mus musculus RIKEN cDNA 1500012F01 gene (1500012F01Rik), mRNA.
Olfr159	92.2	92.8	92.2	-1.00651	86.7	82	-1.05732	102.1	81.1	-1.25894	Mus musculus olfactory receptor 159 (Olfr159), mRNA.
Cggbp1	1673.1	1532.2	1495.4	-1.02461	1105.1	1346.6	1.21853	1455.1	1155.9	-1.25885	Mus musculus CGG triplet repeat binding protein 1 (Cggbp1), mRNA.
Sgsm1	133.3	143.4	141.6	-1.01271	127.8	153.8	1.20344	128	101.7	-1.2586	Mus musculus small G protein signaling modulator 1 (Sgsm1), mRNA.
Olfr1501	65.1	60.3	69.4	1.15091	70.2	66.9	-1.04933	77	61.2	-1.25817	Mus musculus olfactory receptor 1501 (Olfr1501), mRNA.
Ptpn1	284.1	288.1	310.8	1.07879	361	317.1	-1.13844	429.1	341.2	-1.25762	Mus musculus protein tyrosine phosphatase, non-receptor type 1 (Ptpn1), mRNA.
LOC100045887	1851.5	1881.2	1827	-1.02967	2030.2	2335	1.15013	2323.3	1847.7	-1.2574	PREDICTED: Mus musculus similar to PTB-associated splicing factor (LOC100045887), mRNA.
Ltb4r1	87	87.5	83.1	-1.05295	82.2	80.7	-1.01859	106.5	84.7	-1.25738	Mus musculus leukotriene B4 receptor 1 (Ltb4r1), mRNA.
Scarf1	188.3	204.2	208	1.01861	199.6	203.8	1.02104	215.6	171.5	-1.25714	Mus musculus scavenger receptor class F, member 1 (Scarf1), mRNA.
Cnp	142.6	135.6	142.3	1.04941	138.9	141.2	1.01656	177.5	141.2	-1.25708	Mus musculus 2',3'-cyclic nucleotide 3' phosphodiesterase (Cnp), mRNA.
Rgs16	677.9	556.4	565.5	1.01636	1990.7	1406.8	-1.41506	4755.4	3782.9	-1.25708	Mus musculus regulator of G-protein signaling 16 (Rgs16), mRNA.
Abcc1	84.7	81.9	83.5	1.01954	83	85.5	1.03012	111.6	88.8	-1.25676	Mus musculus ATP-binding cassette, sub-family C (CFTR/MRP), member 1 (Abcc1), mRNA.
Otub1	288.7	267.1	303.8	1.1374	323.7	273	-1.18571	407.5	324.3	-1.25655	Mus musculus OTU domain, ubiquitin aldehyde binding 1 (Otub1), mRNA.
Taar7b	80.6	80.5	77.5	-1.03871	84.1	85.2	1.01308	92.1	73.3	-1.25648	Mus musculus trace amine-associated receptor 7B (Taar7b), mRNA.
Irf2bp1	386.9	361.9	332.7	-1.08777	232.7	233.5	1.00344	325.5	259.1	-1.25627	Mus musculus interferon regulatory factor 2 binding protein 1 (Irf2bp1), mRNA.
Ctrb1	80.8	75.4	77.1	1.02255	76	81.1	1.06711	90.2	71.8	-1.25627	Mus musculus chymotrypsinogen B1 (Ctrb1), mRNA.
Ikzf5	136.7	129.1	139	1.07668	140.2	128.2	-1.0936	156.9	124.9	-1.2562	Mus musculus IKAROS family zinc finger 5 (Ikzf5), mRNA.
Vcpip1	164.8	158.4	157.3	-1.00699	146.4	166.1	1.13456	202.1	160.9	-1.25606	Mus musculus valosin containing protein (p97)/p47 complex interacting protein 1 (Vcpip1), mRNA.
Chd4	231.1	234.5	225.1	-1.04176	241.1	274.8	1.13978	292.5	232.9	-1.2559	Mus musculus chromodomain helicase DNA binding protein 4 (Chd4), mRNA.
Sidt2	182	163.9	168.8	1.0299	178.8	178.1	-1.00393	233.7	186.1	-1.25578	Mus musculus SID1 transmembrane family, member 2 (Sidt2), mRNA.
Slc25a19	275.8	281.2	274.9	-1.02292	248.2	259.2	1.04432	395.3	314.8	-1.25572	Mus musculus solute carrier family 25 (mitochondrial thiamine pyrophosphate carrier), member 19 (Slc25a19), nuclear gene encoding mitochondrial protein, mRNA.
LOC554292	71.4	75.8	83.1	1.09631	72.1	65.2	-1.10583	79.1	63	-1.25556	Mus musculus UbiE-YGHL1 fusion protein (LOC554292), mRNA.
Tbk1	2445.5	2477.3	2495	1.00714	2634.9	2917.6	1.10729	3554.9	2831.4	-1.25553	Mus musculus TANK-binding kinase 1 (Tbk1), mRNA.
C330046G03Rik	82.5	80.4	78.4	-1.02551	80.6	83.6	1.03722	97.8	77.9	-1.25546	Mus musculus RIKEN cDNA C330046G03 gene (C330046G03Rik), mRNA.
Nat5	2425.4	2400.4	2375	-1.01069	2187.5	2362.6	1.08005	3232.8	2575.3	-1.25531	Mus musculus N-acetyltransferase 5 (ARD1 homolog, S. cerevisiae) (Nat5), mRNA.
Sf3b4	165.4	161.7	170.7	1.05566	183.5	208.8	1.13787	249.4	198.7	-1.25516	Mus musculus splicing factor 3b, subunit 4 (Sf3b4), mRNA.
Slc38a4	99	87.9	109.3	1.24346	103.4	93.1	-1.11063	122	97.2	-1.25514	Mus musculus solute carrier family 38, member 4 (Slc38a4), mRNA.
Klk7	87.8	85.9	83.8	-1.02506	89.3	84.7	-1.05431	97	77.3	-1.25485	Mus musculus kallikrein related-peptidase 7 (chymotryptic, stratum corneum) (Klk7), mRNA.
Tm9sf4	278.2	265	262.3	-1.01029	307.6	348.4	1.13264	464.8	370.5	-1.25452	Mus musculus transmembrane 9 superfamily protein member 4 (Tm9sf4), mRNA.
Pou3f1	79	87	79.6	-1.09296	81.3	80.1	-1.01498	97.6	77.8	-1.2545	Mus musculus POU domain, class 3, transcription factor 1 (Pou3f1), mRNA.
Epsti1	454.6	420.2	453.4	1.07901	497.9	473.8	-1.05087	642.1	511.9	-1.25435	Mus musculus epithelial stromal interaction 1 (breast) (Epsti1), transcript variant a, mRNA.
Ccnl1	312.4	563.1	532.7	-1.05707	400.8	485.1	1.21033	554.4	442	-1.2543	Mus musculus cyclin L1 (Ccnl1), mRNA.
Sdad1	362.9	358.3	350.1	-1.02342	251.2	299.9	1.19387	396.7	316.3	-1.25419	Mus musculus SDA1 domain containing 1 (Sdad1), mRNA.
Tex22	68.9	77	72.6	-1.06061	70.4	76.2	1.08239	91.4	72.9	-1.25377	Mus musculus testis expressed gene 22 (Tex22), mRNA.
D14Ertd668e	4790.5	4979	5038.7	1.01199	4761.6	5163.2	1.08434	6852.8	5466.7	-1.25355	Mus musculus DNA segment, Chr 14, ERATO Doi 668, expressed (D14Ertd668e), mRNA.
Freq	84.7	86.9	84.7	-1.02597	86.3	83.7	-1.03106	110.3	88	-1.25341
G3bp2	2113.6	2087.4	2043.9	-1.02128	1567.8	1618.1	1.03208	1995.8	1592.3	-1.25341	Mus musculus GTPase activating protein (SH3 domain) binding protein 2 (G3bp2), transcript variant 2, mRNA.
Leo1	297	304.8	274.4	-1.11079	239.7	258.5	1.07843	294.2	234.8	-1.25298	Mus musculus Leo1, Paf1/RNA polymerase II complex component, homolog (S. cerevisiae) (Leo1), mRNA.
Olfr424	68.6	71.4	64.9	-1.10015	73.7	72.1	-1.02219	76.3	60.9	-1.25287	Mus musculus olfactory receptor 424 (Olfr424), mRNA.
LOC100046039	763.2	793.6	787.2	-1.00813	725.1	752.3	1.03751	1039.1	829.4	-1.25283	PREDICTED: Mus musculus similar to histone deacetylase HD1 (LOC100046039), mRNA.
Dctn4	613.2	577.9	587.1	1.01592	461.8	463.5	1.00368	610.6	487.4	-1.25277	Mus musculus dynactin 4 (Dctn4), mRNA.
Klhl25	218.3	224	209.2	-1.07075	194.4	171.6	-1.13287	218.1	174.1	-1.25273	Mus musculus kelch-like 25 (Drosophila) (Klhl25), mRNA.
Odf1	71.6	74.9	72	-1.04028	68.4	62.6	-1.09265	92.7	74	-1.2527	Mus musculus outer dense fiber of sperm tails 1 (Odf1), mRNA.
H2-Q7	602	571.5	581.4	1.01732	780.9	750.2	-1.04092	1043	832.6	-1.2527	Mus musculus histocompatibility 2, Q region locus 7 (H2-Q7), mRNA.
Taf11	231.4	248.3	252.4	1.01651	241.5	264.9	1.09689	304.9	243.4	-1.25267	Mus musculus TAF11 RNA polymerase II, TATA box binding protein (TBP)-associated factor (Taf11), mRNA.
EG665186	97.2	86.8	97.8	1.12673	107.4	106.9	-1.00468	120.6	96.3	-1.25234	Mus musculus predicted gene, EG665186 (EG665186), mRNA.
Krt13	67.9	65	60.7	-1.07084	63.5	64.3	1.0126	72	57.5	-1.25217	Mus musculus keratin 13 (Krt13), mRNA.
Fnbp1l	2539.3	2556.7	2398.4	-1.066	1792.7	1758.7	-1.01933	4082.8	3260.6	-1.25216	Mus musculus formin binding protein 1-like (Fnbp1l), mRNA.
Zfp574	360.5	274.1	261.5	-1.04818	364.7	409.6	1.12311	428.9	342.6	-1.2519	Mus musculus zinc finger protein 574 (Zfp574), mRNA.
9130019P16Rik	72	80.1	72.4	-1.10635	67.8	87.2	1.28614	85.5	68.3	-1.25183	Mus musculus RIKEN cDNA 9130019P16 gene (9130019P16Rik), mRNA.
Rgs14	130.7	127.5	122.3	-1.04252	91.8	96.9	1.05556	103.1	82.4	-1.25121	Mus musculus regulator of G-protein signaling 14 (Rgs14), mRNA.
Rabl2a	298.6	299.2	315.8	1.05548	278.3	309.3	1.11139	335.5	268.2	-1.25093	Mus musculus RAB, member of RAS oncogene family-like 2A (Rabl2a), mRNA.
Nol10	1316.7	1394.8	1304.6	-1.06914	1424.7	1719.2	1.20671	2076.4	1659.9	-1.25092	Mus musculus nucleolar protein 10 (Nol10), mRNA.
Arid5a	74.9	78.3	76.7	-1.02086	72.1	76.5	1.06103	88.3	70.6	-1.25071	Mus musculus AT rich interactive domain 5A (MRF1-like) (Arid5a), mRNA.
Olfr1196	60.8	65.1	56.9	-1.14411	59.7	57.1	-1.04553	62.4	49.9	-1.2505	Mus musculus olfactory receptor 1196 (Olfr1196), mRNA.
Adnp	1026.2	944	911.5	-1.03566	911.8	993.1	1.08916	983.8	786.8	-1.25038	Mus musculus activity-dependent neuroprotective protein (Adnp), mRNA.
Pttg1ip	1963.8	1932.3	1937.2	1.00254	1478.4	1803.8	1.2201	1624.5	1299.4	-1.25019	Mus musculus pituitary tumor-transforming 1 interacting protein (Pttg1ip), mRNA.
Dem1	397	327.8	311.8	-1.05131	241.4	227.1	-1.06297	367.3	293.8	-1.25017	Mus musculus defects in morphology 1 homolog (S. cerevisiae) (Dem1), mRNA.
B3galnt2	95.7	87.8	99	1.12756	96.4	85.2	-1.13146	89.5	71.6	-1.25	Mus musculus UDP-GalNAc:betaGlcNAc beta 1,3-galactosaminyltransferase, polypeptide 2 (B3galnt2), mRNA.
Olfr91	73.4	76.6	74.2	-1.03235	70.7	77.4	1.09477	90	72	-1.25	Mus musculus olfactory receptor 91 (Olfr91), mRNA.
Dcbld2	96.6	102.6	89.9	-1.14127	137.6	149.6	1.08721	188.1	150.5	-1.24983
Rdh8	83.3	85.6	98.1	1.14603	87.3	85.7	-1.01867	94.6	75.7	-1.24967	Mus musculus retinol dehydrogenase 8 (Rdh8), mRNA.
Fiz1	455.5	474.6	524	1.10409	470.7	498.1	1.05821	553	442.6	-1.24944	Mus musculus Flt3 interacting zinc finger protein 1 (Fiz1), mRNA.
Slfn5	72.2	82.3	70	-1.17571	76	82.7	1.08816	103.7	83	-1.2494	Mus musculus schlafen 5 (Slfn5), mRNA.
3110050N22Rik	164.4	156.7	151.7	-1.03296	114.7	108.1	-1.06105	152.3	121.9	-1.24938
Men1	231.5	221.2	229.5	1.03752	156.3	149.3	-1.04689	205.5	164.5	-1.24924	Mus musculus multiple endocrine neoplasia 1 (Men1), mRNA.
Ube2d2	555.9	555	559.1	1.00739	475.9	553.4	1.16285	584	467.5	-1.2492	Mus musculus ubiquitin-conjugating enzyme E2D 2 (Ube2d2), mRNA.
Suv420h1	226.5	275.7	273.7	-1.00731	266.9	285.8	1.07081	312.7	250.4	-1.2488	Mus musculus suppressor of variegation 4-20 homolog 1 (Drosophila) (Suv420h1), mRNA.
Golga3	845.2	855.2	831.5	-1.0285	732.5	718.8	-1.01906	834.2	668.2	-1.24843	Mus musculus golgi autoantigen, golgin subfamily a, 3 (Golga3), mRNA.
D0H8S2298E	151.7	147.5	144	-1.02431	174.3	165.5	-1.05317	193.5	155	-1.24839
Scaf1	213.9	198.9	209.3	1.05229	198.3	182.9	-1.0842	208.9	167.4	-1.24791	Mus musculus SR-related CTD-associated factor 1 (Scaf1), mRNA.
Slamf7	70.6	70.6	78.1	1.10623	65.2	71.7	1.09969	82.6	66.2	-1.24773	Mus musculus SLAM family member 7 (Slamf7), mRNA.
Klhl18	89.5	91.7	93.9	1.02399	96.4	97.4	1.01037	109.8	88	-1.24773	Mus musculus kelch-like 18 (Drosophila) (Klhl18), mRNA.
2510039O18Rik	344	302.7	335.5	1.10836	291.7	293.7	1.00686	383.8	307.6	-1.24772	Mus musculus RIKEN cDNA 2510039O18 gene (2510039O18Rik), mRNA.
Spink3	77.6	79.6	81.8	1.02764	69.5	71.8	1.03309	86.7	69.5	-1.24748
Olfr259	82	75.5	78	1.03311	76.4	76.3	-1.00131	84.2	67.5	-1.24741	Mus musculus olfactory receptor 259 (Olfr259), mRNA.
Crem	92.2	102.7	99.7	-1.03009	125.8	136.8	1.08744	136.2	109.2	-1.24725	Mus musculus cAMP responsive element modulator (Crem), mRNA.
Gp5	77.3	80.1	72.7	-1.10179	80.4	84.5	1.051	86.8	69.6	-1.24713	Mus musculus glycoprotein 5 (platelet) (Gp5), mRNA.
Cog8	1297.1	1206.6	1201.2	-1.0045	1041.1	1049.1	1.00768	1440.4	1155.1	-1.24699
OTTMUSG00000000990	76.5	71	71.6	1.00845	70.1	67.9	-1.0324	88.4	70.9	-1.24683	Mus musculus predicted gene, OTTMUSG00000000990 (OTTMUSG00000000990), mRNA.
Ddx58	1250	1370.6	1295.8	-1.05772	1468.8	1716.6	1.16871	1990.7	1596.7	-1.24676	Mus musculus DEAD (Asp-Glu-Ala-Asp) box polypeptide 58 (Ddx58), mRNA.
Hmox1	408.4	365.2	447.4	1.22508	380.6	553.3	1.45376	416.5	334.2	-1.24626	Mus musculus heme oxygenase (decycling) 1 (Hmox1), mRNA.
F3	65.9	74.3	80.4	1.0821	71.8	74.7	1.04039	81.5	65.4	-1.24618	Mus musculus coagulation factor III (F3), mRNA.
EG229862	75.6	82.8	81.9	-1.01099	78.1	69.6	-1.12213	88.6	71.1	-1.24613	Mus musculus predicted gene, EG229862 (EG229862), mRNA.
Top1	267.7	297.4	287.1	-1.03588	394.2	428.1	1.086	482.2	387	-1.24599	Mus musculus topoisomerase (DNA) I (Top1), mRNA.
Wipf2	183.8	178.1	171.4	-1.03909	185.9	182	-1.02143	222.4	178.5	-1.24594	Mus musculus WAS/WASL interacting protein family, member 2 (Wipf2), mRNA.
2010106G01Rik	651.1	593.8	645.8	1.08757	797.6	777.5	-1.02585	1087.8	873.1	-1.24591	Mus musculus RIKEN cDNA 2010106G01 gene (2010106G01Rik), mRNA.
St3gal4	126.8	134.5	127.3	-1.05656	145.7	128.3	-1.13562	186	149.3	-1.24581	Mus musculus ST3 beta-galactoside alpha-2,3-sialyltransferase 4 (St3gal4), mRNA.
Acbd3	1002.5	1008.9	975.2	-1.03456	927.2	957.1	1.03225	1052.3	844.9	-1.24547	Mus musculus acyl-Coenzyme A binding domain containing 3 (Acbd3), mRNA.
Ammecr1l	280.9	247.8	244.2	-1.01474	302.4	284.7	-1.06217	375.7	301.8	-1.24486	Mus musculus AMME chromosomal region gene 1-like (Ammecr1l), mRNA.
Fem1b	629.6	511.3	520.8	1.01858	761.4	1046.3	1.37418	877.1	704.6	-1.24482	Mus musculus feminization 1 homolog b (C. elegans) (Fem1b), mRNA.
LOC100047046	136.7	141.9	127.4	-1.11381	167.6	183.1	1.09248	180	144.6	-1.24481	PREDICTED: Mus musculus similar to monoacylglycerol O-acyltransferase 1 (LOC100047046), mRNA.
Ptgr1	87.2	89.5	94	1.05028	95.7	110.2	1.15152	106.5	85.6	-1.24416	Mus musculus prostaglandin reductase 1 (Ptgr1), mRNA.
V1rc30	58.9	59.2	56.5	-1.04779	67.9	58.6	-1.1587	63.7	51.2	-1.24414	Mus musculus vomeronasal 1 receptor, C30 (V1rc30), mRNA.
Emilin1	128.1	112	138.6	1.2375	134.4	154.2	1.14732	142.7	114.7	-1.24412
Defb18	64.8	59.7	66.3	1.11055	66.5	61.2	-1.0866	75	60.3	-1.24378	Mus musculus defensin beta 18 (Defb18), mRNA.
Timm13	91.3	88	76.9	-1.14434	88.1	84.2	-1.04632	100	80.4	-1.24378	Mus musculus translocase of inner mitochondrial membrane 13 homolog (yeast) (Timm13), mRNA.
Trib3	557.4	560.6	566	1.00963	224	192.7	-1.16243	222.5	178.9	-1.24371	Mus musculus tribbles homolog 3 (Drosophila) (Trib3), mRNA.
Irf9	908.2	919.1	901.1	-1.01998	969.8	1094.5	1.12858	1280.7	1029.8	-1.24364	Mus musculus interferon regulatory factor 9 (Irf9), mRNA.
Dedd2	321.5	283.3	277.6	-1.02053	153.1	178.9	1.16852	178.2	143.3	-1.24355	Mus musculus death effector domain-containing DNA binding protein 2 (Dedd2), mRNA.
LOC100044776	319	348.8	363.7	1.04272	345.9	403.9	1.16768	371.8	299	-1.24348	PREDICTED: Mus musculus similar to Enhancer of polycomb homolog 2, transcript variant 1 (LOC100044776), mRNA.
Rps6kc1	74.1	76.7	73	-1.05068	73.5	73.3	-1.00273	85.8	69	-1.24348	Mus musculus ribosomal protein S6 kinase polypeptide 1 (Rps6kc1), mRNA.
Serpinb1c	65	60.8	68.5	1.12664	65.8	65.1	-1.01075	77.7	62.5	-1.2432	Mus musculus serine (or cysteine) peptidase inhibitor, clade B, member 1c (Serpinb1c), mRNA.
Pcbp1	3672.2	3942.8	3751.8	-1.05091	4165.8	4197.9	1.00771	4735.9	3810	-1.24302	Mus musculus poly(rC) binding protein 1 (Pcbp1), mRNA.
Psmb9	394.7	401.7	410.5	1.02191	474.1	417.7	-1.13503	598.5	481.5	-1.24299	Mus musculus proteasome (prosome, macropain) subunit, beta type 9 (large multifunctional peptidase 2) (Psmb9), mRNA.
BC003281	92.3	101.3	93.2	-1.08691	103.4	94	-1.1	128	103	-1.24272
Acvrl1	94.5	91.8	90.9	-1.0099	91.5	93.1	1.01749	121.9	98.1	-1.24261	Mus musculus activin A receptor, type II-like 1 (Acvrl1), mRNA.
Abhd2	136.7	154.4	144.7	-1.06704	179.9	215	1.19511	246.6	198.5	-1.24232	Mus musculus abhydrolase domain containing 2 (Abhd2), mRNA.
BC052055	83.6	83.3	85.8	1.03001	90	81.4	-1.10565	88.7	71.4	-1.2423	Mus musculus cDNA sequence BC052055 (BC052055), mRNA.
Cacna2d3	88.2	92.8	81.6	-1.13725	96.5	93.8	-1.02878	102.2	82.3	-1.2418	Mus musculus calcium channel, voltage-dependent, alpha2/delta subunit 3 (Cacna2d3), mRNA.
Pgd	9878.3	9028.9	9521.4	1.05455	8044.4	8322.9	1.03462	8204.9	6607.7	-1.24172
Cdkl3	95.1	89.4	95.2	1.06488	89.7	95.9	1.06912	117.3	94.5	-1.24127	Mus musculus cyclin-dependent kinase-like 3 (Cdkl3), mRNA.
Col5a3	70.3	74.2	67.5	-1.09926	66.7	72.8	1.09145	84.9	68.4	-1.24123
Atxn2	911.6	1001.5	952.2	-1.05177	728.9	687.6	-1.06006	1100.2	886.5	-1.24106	Mus musculus ataxin 2 (Atxn2), mRNA.
Vrk3	451.1	463.2	482.1	1.0408	517.2	562	1.08662	526.9	424.7	-1.24064	Mus musculus vaccinia related kinase 3 (Vrk3), mRNA.
Zfp191	108	118.1	123.5	1.04572	135.1	157.2	1.16358	155.2	125.1	-1.24061	Mus musculus zinc finger protein 191 (Zfp191), mRNA.
Cd200r1	80.8	80.3	80.5	1.00249	73	71.8	-1.01671	78.9	63.6	-1.24057	Mus musculus CD200 receptor 1 (Cd200r1), mRNA.
Rsl1	69.4	61	67.1	1.1	64.4	67.4	1.04658	75.9	61.2	-1.2402	Mus musculus regulator of sex limited protein 1 (Rsl1), mRNA.
Cpt1a	74.9	69.6	70.2	1.00862	81.5	72.1	-1.13037	79.2	63.9	-1.23944	Mus musculus carnitine palmitoyltransferase 1a, liver (Cpt1a), mRNA.
Mcart6	64.2	63	61.4	-1.02606	69.5	63.4	-1.09621	78.7	63.5	-1.23937	Mus musculus mitochondrial carrier triple repeat 6 (Mcart6), mRNA.
LOC100044934	81.4	85.5	82.1	-1.04141	87.7	76.2	-1.15092	103.1	83.2	-1.23918	PREDICTED: Mus musculus similar to cardiomyopathy associated 4 (LOC100044934), misc RNA.
Olfr55	70.6	68.2	71.3	1.04545	71.1	67.8	-1.04867	81.9	66.1	-1.23903	Mus musculus olfactory receptor 55 (Olfr55), mRNA.
Cc2d1a	470	485.4	476.6	-1.01846	362.5	352.6	-1.02808	472.9	381.7	-1.23893	Mus musculus coiled-coil and C2 domain containing 1A (Cc2d1a), mRNA.
4930599N23Rik	102.2	107.2	94.8	-1.1308	95.5	93.5	-1.02139	128.6	103.8	-1.23892	PREDICTED: Mus musculus RIKEN cDNA 4930599N23 gene (4930599N23Rik), misc RNA.
Mesdc1	122.3	132.1	121.7	-1.08546	125.8	130.6	1.03816	169.1	136.5	-1.23883	Mus musculus mesoderm development candidate 1 (Mesdc1), mRNA.
Dbnl	413	442.3	434.1	-1.01889	478.7	439.1	-1.09018	537.6	434	-1.23871	Mus musculus drebrin-like (Dbnl), mRNA.
Grin2d	62.9	55.6	57.3	1.03058	55.4	57.7	1.04152	65.4	52.8	-1.23864	Mus musculus glutamate receptor, ionotropic, NMDA2D (epsilon 4) (Grin2d), mRNA.
Gtpbp2	2431.9	2216.9	2427.2	1.09486	2310.7	1924.2	-1.20086	2774.4	2240.1	-1.23852	Mus musculus GTP binding protein 2 (Gtpbp2), mRNA.
Dnd1	88.7	84.3	87.2	1.0344	80.4	84.9	1.05597	93.5	75.5	-1.23841	Mus musculus dead end homolog 1 (zebrafish) (Dnd1), mRNA.
Olfr460	63.4	69.6	62.3	-1.11717	59.4	58.5	-1.01538	70.7	57.1	-1.23818	Mus musculus olfactory receptor 460 (Olfr460), mRNA.
Jak3	98	105.6	106.2	1.00568	99.4	94.3	-1.05408	121.7	98.3	-1.23805	Mus musculus Janus kinase 3 (Jak3), mRNA.
LOC100044812	72.9	89.9	69.1	-1.30101	78.4	87.8	1.1199	86.4	69.8	-1.23782	PREDICTED: Mus musculus similar to cornichon homolog 2 (Drosophila) (LOC100044812), mRNA.
2310006J04Rik	67.1	61.4	69.3	1.12866	63.9	53	-1.20566	63	50.9	-1.23772
Gvin1	465.4	507.8	496.8	-1.02214	508.6	566.9	1.11463	611.5	494.1	-1.2376	Mus musculus GTPase, very large interferon inducible 1 (Gvin1), transcript variant B, mRNA.
Klra2	78.2	79.2	80.1	1.01136	86.8	88.5	1.01959	116.7	94.3	-1.23754	Mus musculus killer cell lectin-like receptor, subfamily A, member 2 (Klra2), mRNA.
Olfr556	72.9	78.1	75.2	-1.03856	71.6	72.4	1.01117	78.7	63.6	-1.23742	Mus musculus olfactory receptor 556 (Olfr556), mRNA.
Thg1l	474.7	470.3	485.6	1.03253	555.7	651.3	1.17204	736.5	595.2	-1.2374	Mus musculus tRNA-histidine guanylyltransferase 1-like (S. cerevisiae) (Thg1l), mRNA.
Peli1	309.9	347.6	340.4	-1.02115	1199.4	1422	1.18559	1690.1	1365.9	-1.23735	Mus musculus pellino 1 (Peli1), mRNA.
V1rg11	82.2	92	83.6	-1.10048	84.5	73.8	-1.14499	99.1	80.1	-1.2372	Mus musculus vomeronasal 1 receptor, G11 (V1rg11), mRNA.
Dub2	71.8	76.7	77.3	1.00782	72.6	68.9	-1.0537	84.5	68.3	-1.23719	Mus musculus deubiquitinating enzyme 2 (Dub2), mRNA.
Arid2	180	180.9	197	1.089	138.4	144.1	1.04118	187.9	151.9	-1.237	Mus musculus AT rich interactive domain 2 (ARID, RFX-like) (Arid2), mRNA.
Tmem167b	265.8	205.8	208.9	1.01506	184.4	183.8	-1.00326	207.3	167.6	-1.23687	Mus musculus transmembrane protein 167B (Tmem167b), mRNA.
G430055L02Rik	82.9	86.2	82.6	-1.04358	87.5	84.8	-1.03184	105.5	85.3	-1.23681
Lrtm2	61.8	67.3	58.7	-1.14651	68	63.9	-1.06416	72.1	58.3	-1.23671	Mus musculus leucine-rich repeats and transmembrane domains 2 (Lrtm2), mRNA.
Palld	94.5	97.6	103.9	1.06455	107	102.4	-1.04492	121.5	98.3	-1.23601	Mus musculus palladin, cytoskeletal associated protein (Palld), mRNA.
Eif1ay	75	81.4	74.6	-1.09115	69	79.5	1.15217	86	69.6	-1.23563	Mus musculus eukaryotic translation initiation factor 1A, Y-linked (Eif1ay), mRNA.
V1rc16	69.5	70	69.6	-1.00575	73.9	64.3	-1.1493	81.3	65.8	-1.23556	Mus musculus vomeronasal 1 receptor, C16 (V1rc16), mRNA.
Olfr854	65.5	65	68	1.04615	59.2	56.7	-1.04409	72.4	58.6	-1.23549	Mus musculus olfactory receptor 854 (Olfr854), mRNA.
Grn	11740.1	11508.4	10825.4	-1.06309	10319.4	11508.4	1.11522	12618.7	10214.5	-1.23537	Mus musculus granulin (Grn), mRNA.
Mapre2	168.5	151.9	166.8	1.09809	147.2	157.4	1.06929	194.2	157.2	-1.23537	Mus musculus microtubule-associated protein, RP/EB family, member 2 (Mapre2), mRNA.
Grem2	83	87.3	86.3	-1.01159	94.5	89.4	-1.05705	102.4	82.9	-1.23522	Mus musculus gremlin 2 homolog, cysteine knot superfamily (Xenopus laevis) (Grem2), mRNA.
Fez2	565.4	627.1	553.3	-1.13338	354	338.2	-1.04672	515.5	417.4	-1.23503
Arfl4	93.8	97.1	103	1.06076	92	101.7	1.10543	120	97.2	-1.23457	Mus musculus ADP-ribosylation factor 4-like (Arfl4), mRNA.
Mpv17l	205.3	178	192.2	1.07978	160.1	162.7	1.01624	189.5	153.5	-1.23453	Mus musculus Mpv17 transgene, kidney disease mutant-like (Mpv17l), mRNA.
Dync1li2	254.6	251.1	257.8	1.02668	239.1	228.9	-1.04456	263.2	213.2	-1.23452	Mus musculus dynein, cytoplasmic 1 light intermediate chain 2 (Dync1li2), mRNA.
Lilrb4	1121.7	1155.3	1124	-1.02785	2021.5	2361.1	1.16799	3345.2	2709.9	-1.23444	Mus musculus leukocyte immunoglobulin-like receptor, subfamily B, member 4 (Lilrb4), mRNA.
Flg2	66.2	66.9	64	-1.04531	67.6	71.8	1.06213	69	55.9	-1.23435	Mus musculus filaggrin family member 2 (Flg2), mRNA.
Hsdl1	417.6	397.7	393.9	-1.00965	279.7	289.5	1.03504	358.7	290.6	-1.23434	Mus musculus hydroxysteroid dehydrogenase like 1 (Hsdl1), mRNA.
Ptpn5	87.7	83.5	92	1.1018	99.4	117.9	1.18612	101.2	82	-1.23415	Mus musculus protein tyrosine phosphatase, non-receptor type 5 (Ptpn5), mRNA.
LOC666979	72.8	80.3	75.6	-1.06217	86.5	90.2	1.04277	99.2	80.4	-1.23383	PREDICTED: Mus musculus similar to gamma actin-like protein (LOC666979), misc RNA.
Spink2	68.2	72.3	72.9	1.0083	70.5	71.8	1.01844	78.1	63.3	-1.23381	Mus musculus serine peptidase inhibitor, Kazal type 2 (Spink2), mRNA.
H6pd	366.2	352.6	337.3	-1.04536	266.2	258	-1.03178	380.6	308.5	-1.23371	Mus musculus hexose-6-phosphate dehydrogenase (glucose 1-dehydrogenase) (H6pd), mRNA.
LOC100044756	238.6	269.8	259.8	-1.03849	237.4	196.1	-1.21061	259.4	210.3	-1.23348	PREDICTED: Mus musculus similar to PX domain-containing protein kinase-like protein (Modulator of Na,K-ATPase) (MONaKA) (LOC100044756), mRNA.
Dapp1	259.6	291.5	273.9	-1.06426	185.6	179	-1.03687	206.1	167.2	-1.23266	Mus musculus dual adaptor for phosphotyrosine and 3-phosphoinositides 1 (Dapp1), mRNA.
Saps1	252.1	252.4	253.6	1.00475	260.8	242.9	-1.07369	317.1	257.3	-1.23241	Mus musculus SAPS domain family, member 1 (Saps1), mRNA.
Mat2a	1716.5	1822.4	1853.8	1.01723	1853	2201.3	1.18797	2250.7	1826.6	-1.23218	Mus musculus methionine adenosyltransferase II, alpha (Mat2a), mRNA.
Insl6	781.5	750	733.5	-1.02249	862.1	806.4	-1.06907	1446.2	1173.8	-1.23207	Mus musculus insulin-like 6 (Insl6), mRNA.
Flcn	571.9	477.9	483.8	1.01235	266.3	391.5	1.47015	342.4	278	-1.23165	Mus musculus folliculin (Flcn), mRNA.
Adrb1	80.1	81.5	65.8	-1.2386	72.9	68.3	-1.06735	88.8	72.1	-1.23162	Mus musculus adrenergic receptor, beta 1 (Adrb1), mRNA.
Fam109a	469.6	437.2	389	-1.12391	199.4	256.5	1.28636	278.1	225.8	-1.23162	Mus musculus family with sequence similarity 109, member A (Fam109a), mRNA.
Gdpd1	301.2	306.7	312.5	1.01891	301.9	362.9	1.20205	362.2	294.2	-1.23114	Mus musculus glycerophosphodiester phosphodiesterase domain containing 1 (Gdpd1), mRNA.
Apob48r	1066.6	948.2	965.5	1.01825	1143.5	1104.6	-1.03522	1660.4	1348.7	-1.23111	Mus musculus apolipoprotein B48 receptor (Apob48r), mRNA.
Pofut1	107.4	112.8	114.5	1.01507	114.8	106.8	-1.07491	152.4	123.8	-1.23102	Mus musculus protein O-fucosyltransferase 1 (Pofut1), transcript variant 2, mRNA.
Wwc1	80.9	90.6	86.2	-1.05104	89.2	124	1.39013	98.6	80.1	-1.23096	Mus musculus WW, C2 and coiled-coil domain containing 1 (Wwc1), mRNA.
Mrpl19	69	69	71.1	1.03043	64.5	59.7	-1.0804	75.2	61.1	-1.23077
Pcdhb4	76.1	69.8	70.7	1.01289	76.5	77.6	1.01438	79	64.2	-1.23053	Mus musculus protocadherin beta 4 (Pcdhb4), mRNA.
Slc30a1	175.2	196.1	177.1	-1.10728	431.8	570.3	1.32075	499.7	406.1	-1.23049	Mus musculus solute carrier family 30 (zinc transporter), member 1 (Slc30a1), mRNA.
Armc6	430.3	447.4	446.4	-1.00224	341.7	328.3	-1.04082	405	329.2	-1.23026	Mus musculus armadillo repeat containing 6 (Armc6), mRNA.
Psap	5125.7	5397.4	4879.9	-1.10605	4116.7	4063.8	-1.01302	4403.3	3579.4	-1.23018	Mus musculus prosaposin (Psap), mRNA.
Olfr703	94.9	90.2	80.3	-1.12329	94.9	126.4	1.33193	96.8	78.7	-1.22999	Mus musculus olfactory receptor 703 (Olfr703), mRNA.
Ints12	185.2	200.5	187.7	-1.06819	165.9	201.5	1.21459	205.6	167.2	-1.22967	Mus musculus integrator complex subunit 12 (Ints12), mRNA.
Ptpn12	191	200.5	191.1	-1.04919	227.8	254.5	1.11721	273.6	222.5	-1.22966	Mus musculus protein tyrosine phosphatase, non-receptor type 12 (Ptpn12), mRNA.
Zc3h13	152.1	153.6	156.6	1.01953	142.1	151.1	1.06334	159.6	129.8	-1.22958	Mus musculus zinc finger CCCH type containing 13 (Zc3h13), mRNA.
Cml3	71.6	63.5	62.7	-1.01276	68.1	66.1	-1.03026	79.8	64.9	-1.22958	Mus musculus camello-like 3 (Cml3), transcript variant 2, mRNA.
Pip5k1b	942.9	951.9	978	1.02742	940.7	937.4	-1.00352	1354.3	1101.6	-1.22939	Mus musculus phosphatidylinositol-4-phosphate 5-kinase, type 1 beta (Pip5k1b), mRNA.
Tmem115	262.7	210.7	228.9	1.08638	222.8	213.7	-1.04258	335.1	272.6	-1.22927	Mus musculus transmembrane protein 115 (Tmem115), mRNA.
Pacrg	107.4	113.2	113.5	1.00265	115.3	119.3	1.03469	149.1	121.3	-1.22918	Mus musculus Park2 co-regulated (Pacrg), mRNA.
Tnfsf4	71.7	79.5	69.3	-1.14719	66.4	70.8	1.06627	86.4	70.3	-1.22902	Mus musculus tumor necrosis factor (ligand) superfamily, member 4 (Tnfsf4), mRNA.
Scarb2	519.5	521.5	489.9	-1.0645	573	580.1	1.01239	682.5	555.5	-1.22862	Mus musculus scavenger receptor class B, member 2 (Scarb2), mRNA.
LOC100047810	83.5	80.9	81.3	1.00494	100.8	90.9	-1.10891	94.6	77	-1.22857	PREDICTED: Mus musculus similar to transmembrane emp24 protein transport domain containing 6 (LOC100047810), mRNA.
Foxl1	82.4	79	89.7	1.13544	81.1	80.6	-1.0062	93.6	76.2	-1.22835	Mus musculus forkhead box L1 (Foxl1), mRNA.
Ap2a2	328.5	287.2	282.7	-1.01592	279.3	271.9	-1.02722	254.4	207.2	-1.2278	Mus musculus adaptor protein complex AP-2, alpha 2 subunit (Ap2a2), mRNA.
Rnuxa	687.9	557.7	584.6	1.04823	504.9	480.4	-1.051	643.1	523.8	-1.22776	Mus musculus RNA U, small nuclear RNA export adaptor (Rnuxa), mRNA.
Pla2g4b	88.9	84.5	90.7	1.07337	101.2	80.9	-1.25093	123.5	100.6	-1.22763	Mus musculus phospholipase A2, group IVB (cytosolic) (Pla2g4b), mRNA. XM_900391 XM_900400 XM_900408 XM_900416 XM_900430 XM_917664 XM_925074 XM_925078 XM_925084 XM_925088 XM_925090 XM_925092 XM_925095 XM_983757 XM_983791 XM_983829 XM_983873 XM_983913 XM_984017
Smcr8	78.6	78.3	79.5	1.01533	77.8	79.3	1.01928	91.7	74.7	-1.22758	Mus musculus Smith-Magenis syndrome chromosome region, candidate 8 homolog (human) (Smcr8), transcript variant 2, mRNA.
AI507495	79	86.5	79.9	-1.0826	77.9	78.8	1.01155	93.9	76.5	-1.22745
1200009I06Rik	95.1	94.6	101.9	1.07717	147.6	133.5	-1.10562	284.4	231.7	-1.22745
Papln	69.2	79.2	74.6	-1.06166	79.7	77	-1.03506	81	66	-1.22727	Mus musculus papilin, proteoglycan-like sulfated glycoprotein (Papln), mRNA.
Tmem184b	4744.3	4826.5	4816.8	-1.00201	4180.7	4338.2	1.03767	4855.6	3957.3	-1.227	Mus musculus transmembrane protein 184b (Tmem184b), mRNA.
Hipk1	99.4	100.7	89.2	-1.12892	141.8	145.5	1.02609	182.2	148.5	-1.22694	Mus musculus homeodomain interacting protein kinase 1 (Hipk1), mRNA.
Nagpa	284.7	282.9	279.9	-1.01072	281	267.6	-1.05007	304	247.8	-1.2268	Mus musculus N-acetylglucosamine-1-phosphodiester alpha-N-acetylglucosaminidase (Nagpa), mRNA.
Anxa1	644.4	585.8	563.7	-1.03921	874	701.6	-1.24572	1205.2	982.4	-1.22679	Mus musculus annexin A1 (Anxa1), mRNA.
Zc3h7a	435.6	410.2	374.3	-1.09591	528.3	571.8	1.08234	695.1	566.6	-1.22679	Mus musculus zinc finger CCCH type containing 7 A (Zc3h7a), mRNA.
Dcun1d2	211.3	204.5	218.3	1.06748	167.6	174.5	1.04117	268.7	219.1	-1.22638	Mus musculus DCN1, defective in cullin neddylation 1, domain containing 2 (S. cerevisiae) (Dcun1d2), transcript variant 3, mRNA.
Trpc6	92.9	94.2	97.2	1.03185	100.3	91.8	-1.09259	110	89.7	-1.22631	Mus musculus transient receptor potential cation channel, subfamily C, member 6 (Trpc6), mRNA.
Olfr1271	71.7	64	66.3	1.03594	72.2	72.5	1.00416	80.2	65.4	-1.2263	Mus musculus olfactory receptor 1271 (Olfr1271), mRNA.
Ripk1	286.4	267.5	296.7	1.10916	180.9	207.9	1.14925	227.1	185.2	-1.22624	Mus musculus receptor (TNFRSF)-interacting serine-threonine kinase 1 (Ripk1), mRNA.
Them5	76.2	74	78.6	1.06216	73.3	78.9	1.0764	85.1	69.4	-1.22622	Mus musculus thioesterase superfamily member 5 (Them5), mRNA.
Cyp2r1	66.4	71.2	73.1	1.02669	70.2	78.9	1.12393	79.7	65	-1.22615	Mus musculus cytochrome P450, family 2, subfamily r, polypeptide 1 (Cyp2r1), mRNA.
Arih1	273.4	310.8	302.1	-1.0288	351.9	356	1.01165	381.7	311.3	-1.22615	Mus musculus ariadne ubiquitin-conjugating enzyme E2 binding protein homolog 1 (Drosophila) (Arih1), mRNA.
Itga2	68.5	62.6	64.5	1.03035	61.6	62.1	1.00812	77	62.8	-1.22611	Mus musculus integrin alpha 2 (Itga2), mRNA.
Pde2a	235.8	230.7	241.5	1.04681	245	260	1.06122	271.7	221.6	-1.22608	Mus musculus phosphodiesterase 2A, cGMP-stimulated (Pde2a), mRNA.
2310005G13Rik	65.3	62.3	66.6	1.06902	65.4	67.2	1.02752	78.1	63.7	-1.22606	Mus musculus RIKEN cDNA 2310005G13 gene (2310005G13Rik), mRNA.
Stambpl1	696.6	785.4	736.5	-1.0664	675.8	653.3	-1.03444	1084.3	884.4	-1.22603	Mus musculus Stam binding protein like 1 (Stambpl1), mRNA.
Fabp3	128	126.7	130	1.02605	160.4	159.1	-1.00817	188.3	153.6	-1.22591	Mus musculus fatty acid binding protein 3, muscle and heart (Fabp3), mRNA.
Oplah	76.8	79	78.9	-1.00127	78.1	85.7	1.09731	89.1	72.7	-1.22558	Mus musculus 5-oxoprolinase (ATP-hydrolysing) (Oplah), mRNA.
Ccdc94	208	210.7	226.3	1.07404	277.1	289.7	1.04547	450.4	367.5	-1.22558	Mus musculus coiled-coil domain containing 94 (Ccdc94), mRNA.
Irak2	1004.8	1084	1143.3	1.0547	1059.7	926	-1.14438	1648.6	1345.2	-1.22554	Mus musculus interleukin-1 receptor-associated kinase 2 (Irak2), mRNA.
Tmed1	128.7	125.9	125.3	-1.00479	125.8	124.3	-1.01207	140.8	114.9	-1.22541	Mus musculus transmembrane emp24 domain containing 1 (Tmed1), mRNA.
D11Wsu47e	404.8	381.7	365.4	-1.04461	353.3	354.3	1.00283	546.4	446	-1.22511	Mus musculus DNA segment, Chr 11, Wayne State University 47, expressed (D11Wsu47e), mRNA.
Clca4	71.2	66.9	72.3	1.08072	71.8	68.1	-1.05433	82.2	67.1	-1.22504	Mus musculus chloride channel calcium activated 4 (Clca4), mRNA.
Pnliprp1	78.3	75.2	60.5	-1.24298	70.7	71.5	1.01132	79.5	64.9	-1.22496	Mus musculus pancreatic lipase related protein 1 (Pnliprp1), mRNA.
Snapc2	77.5	87	84.9	-1.02473	79.7	76.4	-1.04319	85.5	69.8	-1.22493	Mus musculus small nuclear RNA activating complex, polypeptide 2 (Snapc2), mRNA.
1110012D08Rik	210.7	232.7	222.4	-1.04631	166.3	184.2	1.10764	208.2	170	-1.22471	Mus musculus RIKEN cDNA 1110012D08 gene (1110012D08Rik), mRNA.
Ppp2r5e	542.8	518	551.8	1.06525	465	434.3	-1.07069	515.8	421.2	-1.2246	Mus musculus protein phosphatase 2, regulatory subunit B (B56), epsilon isoform (Ppp2r5e), mRNA.
Lrch1	83.1	85.3	83	-1.02771	74	71.3	-1.03787	85.1	69.5	-1.22446	Mus musculus leucine-rich repeats and calponin homology (CH) domain containing 1 (Lrch1), mRNA.
4933439C20Rik	881.2	698.8	614.3	-1.13755	530.2	517.2	-1.02514	769.3	628.3	-1.22442	Mus musculus RIKEN cDNA 4933439C20 gene (4933439C20Rik), mRNA.
Mfap1b	185.3	169.4	183	1.08028	160.1	159.5	-1.00376	166.5	136	-1.22426	Mus musculus microfibrillar-associated protein 1B (Mfap1b), mRNA.
Srxn1	240.5	340.8	363.8	1.06749	1184	1774.1	1.4984	1278.6	1044.4	-1.22424	Mus musculus sulfiredoxin 1 homolog (S. cerevisiae) (Srxn1), mRNA.
Ap3b2	63.3	68.3	66.6	-1.02553	62.5	69.7	1.1152	71	58	-1.22414	Mus musculus adaptor-related protein complex 3, beta 2 subunit (Ap3b2), mRNA.
Cops8	892.1	877.7	843.4	-1.04067	791	936.3	1.18369	1105.1	902.9	-1.22395	Mus musculus COP9 (constitutive photomorphogenic) homolog, subunit 8 (Arabidopsis thaliana) (Cops8), mRNA.
Usf1	134.9	120	134	1.11667	101.1	93.3	-1.0836	140.5	114.8	-1.22387	Mus musculus upstream transcription factor 1 (Usf1), mRNA.
Dnase1l3	74.8	67.9	68.6	1.01031	68.8	70.3	1.0218	77.1	63	-1.22381
Pip4k2b	481.2	441.3	471.1	1.06753	288.3	314	1.08914	353.8	289.1	-1.2238	Mus musculus phosphatidylinositol-5-phosphate 4-kinase, type II, beta (Pip4k2b), mRNA.
Zbtb39	121	111.8	114.9	1.02773	115.7	112.4	-1.02936	154.8	126.5	-1.22372	Mus musculus zinc finger and BTB domain containing 39 (Zbtb39), mRNA.
Rpe65	76.4	82.1	80.5	-1.01988	88.4	80.8	-1.09406	93	76	-1.22368	Mus musculus retinal pigment epithelium 65 (Rpe65), mRNA.
Psg17	76.2	77.5	84.9	1.09548	79.4	75.9	-1.04611	82.1	67.1	-1.22355
Heyl	70.8	68.7	65.7	-1.04566	75.7	70.2	-1.07835	84.9	69.4	-1.22334	Mus musculus hairy/enhancer-of-split related with YRPW motif-like (Heyl), mRNA.
Nrbp1	190.2	193.9	191.4	-1.01306	230.1	228.2	-1.00833	275.1	224.9	-1.22321	Mus musculus nuclear receptor binding protein 1 (Nrbp1), mRNA.
Ube4a	82.7	88.1	87.4	-1.00801	84.6	92.4	1.0922	98.7	80.7	-1.22305	Mus musculus ubiquitination factor E4A, UFD2 homolog (S. cerevisiae) (Ube4a), mRNA.
Nckipsd	196.5	173.8	166.5	-1.04384	157.1	166.1	1.05729	154.7	126.5	-1.22292	Mus musculus NCK interacting protein with SH3 domain (Nckipsd), mRNA.
Crcp	728.2	674.8	704.3	1.04372	659.3	753.9	1.14349	881.9	721.2	-1.22282	Mus musculus calcitonin gene-related peptide-receptor component protein (Crcp), mRNA.
Olfr1133	82.2	89.8	74.5	-1.20537	85.7	82	-1.04512	95.6	78.2	-1.22251	Mus musculus olfactory receptor 1133 (Olfr1133), mRNA.
Ubap2l	333.5	341.9	331.9	-1.03013	373.7	411.1	1.10008	468.2	383	-1.22245	Mus musculus ubiquitin associated protein 2-like (Ubap2l), transcript variant 2, mRNA.
Gm1679	69.7	64.6	62.3	-1.03692	63.9	64	1.00156	76.4	62.5	-1.2224	Mus musculus gene model 1679, (NCBI) (Gm1679), mRNA.
Eif5	3220.2	3520.3	3304.7	-1.06524	2883.1	3446.6	1.19545	3375.7	2761.8	-1.22228	Mus musculus eukaryotic translation initiation factor 5 (Eif5), transcript variant 1, mRNA.
Dgkh	84.8	81.7	92.5	1.13219	87	101.8	1.17011	122.2	100	-1.222	Mus musculus diacylglycerol kinase, eta (Dgkh), mRNA.
Trfp	834.8	674.1	675.2	1.00163	541.6	480.7	-1.12669	686.5	561.8	-1.22197	Mus musculus Trf (TATA binding protein-related factor)-proximal protein homolog (Drosophila) (Trfp), mRNA.
Nomo1	892.2	788.8	849.9	1.07746	839.3	888.5	1.05862	968	792.2	-1.22191	Mus musculus nodal modulator 1 (Nomo1), mRNA.
Cyp2c38	70.6	70.8	61.9	-1.14378	67.4	69.7	1.03412	75.5	61.8	-1.22168	Mus musculus cytochrome P450, family 2, subfamily c, polypeptide 38 (Cyp2c38), mRNA.
Tle4	375.2	424.6	417.6	-1.01676	341.9	403.2	1.17929	390.9	320	-1.22156	Mus musculus transducin-like enhancer of split 4, homolog of Drosophila E(spl) (Tle4), mRNA. XM_924093 XM_924097 XM_924099 XM_924101 XM_924105 XM_924108 XM_924112 XM_924118
Mapkapk2	3411.7	3255.6	3467.5	1.06509	4215.3	3962.7	-1.06374	5928.2	4855.6	-1.2209	Mus musculus MAP kinase-activated protein kinase 2 (Mapkapk2), mRNA.
2310046O06Rik	110.1	105.7	96.7	-1.09307	102.7	82.3	-1.24787	128.8	105.5	-1.22085	Mus musculus RIKEN cDNA 2310046O06 gene (2310046O06Rik), mRNA.
Isl2	110.4	110.8	102.6	-1.07992	85	90.9	1.06941	118.4	97	-1.22062	Mus musculus insulin related protein 2 (islet 2) (Isl2), mRNA.
Pdcd10	515.6	521.5	491.3	-1.06147	500.6	568.2	1.13504	612.4	501.8	-1.22041	Mus musculus programmed cell death 10 (Pdcd10), mRNA.
4930427A07Rik	127.5	123	110.7	-1.11111	98.2	91.2	-1.07675	104.1	85.3	-1.2204	Mus musculus RIKEN cDNA 4930427A07 gene (4930427A07Rik), mRNA.
Phf6	249.4	249.8	247.1	-1.01093	238.9	230.7	-1.03554	247.7	203	-1.2202	Mus musculus PHD finger protein 6 (Phf6), mRNA.
Zfp292	348.7	357.8	343.3	-1.04224	205.4	193.4	-1.06205	280.6	230	-1.22	PREDICTED: Mus musculus zinc finger protein 292, transcript variant 4 (Zfp292), mRNA.
Pigl	543.2	523.9	562.8	1.07425	473.7	551.3	1.16382	617.7	506.4	-1.21979
Las1l	106.5	105.4	121.7	1.15465	99.7	98.8	-1.00911	118.3	97	-1.21959	Mus musculus LAS1-like (S. cerevisiae) (Las1l), mRNA.
Ffar1	75.4	80	79.4	-1.00756	71.6	79.1	1.10475	88.9	72.9	-1.21948	Mus musculus free fatty acid receptor 1 (Ffar1), mRNA.
Zkscan6	248.5	317.1	274.5	-1.15519	282	299.3	1.06135	393.5	322.8	-1.21902	Mus musculus zinc finger with KRAB and SCAN domains 6 (Zkscan6), mRNA.
1700049K14Rik	73.3	66.6	58.3	-1.14237	64.1	71.5	1.11544	78.5	64.4	-1.21894	Mus musculus RIKEN cDNA 1700049K14 gene (1700049K14Rik), mRNA.
4930519F16Rik	64	65.4	64.9	-1.0077	68.2	64.8	-1.05247	68.5	56.2	-1.21886	Mus musculus RIKEN cDNA 4930519F16 gene (4930519F16Rik), mRNA.
Ube2l3	1891.8	1826.6	1803.4	-1.01286	1489.4	1727.8	1.16006	1689.3	1386	-1.21883	Mus musculus ubiquitin-conjugating enzyme E2L 3 (Ube2l3), mRNA.
Slco4a1	3344.1	2792.3	2771.1	-1.00765	1174	1347.7	1.14796	1210.4	993.1	-1.21881	Mus musculus solute carrier organic anion transporter family, member 4a1 (Slco4a1), mRNA.
2310035K24Rik	439.2	414.2	418.5	1.01038	253.4	247.7	-1.02301	338.2	277.5	-1.21874	Mus musculus RIKEN cDNA 2310035K24 gene (2310035K24Rik), mRNA.
Nkain3	77.1	78	84.6	1.08462	85.9	67.6	-1.27071	100.9	82.8	-1.2186	Mus musculus Na+/K+ transporting ATPase interacting 3 (Nkain3), mRNA.
Fem1a	89.7	99.9	90.8	-1.10022	97	86.6	-1.12009	106	87	-1.21839	Mus musculus feminization 1 homolog a (C. elegans) (Fem1a), mRNA.
Atf7ip	425.9	469.2	449.7	-1.04336	323.2	344.5	1.0659	411.2	337.5	-1.21837	Mus musculus activating transcription factor 7 interacting protein (Atf7ip), mRNA.
Rabep1	189.7	199.6	186.4	-1.07082	194.6	181	-1.07514	234	192.1	-1.21812	Mus musculus rabaptin, RAB GTPase binding effector protein 1 (Rabep1), mRNA.
Cd33	125	132	112.7	-1.17125	172.3	186.7	1.08358	252.3	207.2	-1.21766	Mus musculus CD33 antigen (Cd33), mRNA.
Wsb1	2145.6	2413.2	2276.4	-1.06009	1748.3	2398.4	1.37185	1869.6	1535.5	-1.21758	Mus musculus WD repeat and SOCS box-containing 1 (Wsb1), transcript variant 2, mRNA.
Il1b	75.5	485.6	512.4	1.05519	9008.8	9694.4	1.0761	20836.9	17115.1	-1.21746
Phospho1	77.2	82.2	69.7	-1.17934	80.9	77.4	-1.04522	86.3	70.9	-1.21721	Mus musculus phosphatase, orphan 1 (Phospho1), mRNA.
Rgs13	67.9	68.1	69.1	1.01468	72.2	70.5	-1.02411	83	68.2	-1.21701	Mus musculus regulator of G-protein signaling 13 (Rgs13), mRNA.
3830402I07Rik	72.2	68.8	69.6	1.01163	77.2	63.7	-1.21193	84.7	69.6	-1.21695	Mus musculus RIKEN cDNA 3830402I07 gene (3830402I07Rik), mRNA.
Sh3bp5	95.6	92.3	95.6	1.03575	87.9	95	1.08077	107.7	88.5	-1.21695	Mus musculus SH3-domain binding protein 5 (BTK-associated) (Sh3bp5), mRNA.
Ccdc92	133.4	127.7	132.7	1.03915	101.7	105.6	1.03835	117.8	96.8	-1.21694	Mus musculus coiled-coil domain containing 92 (Ccdc92), mRNA.
B230206H07Rik	74.2	72.2	69.6	-1.03736	65.4	65.1	-1.00461	79.1	65	-1.21692	Mus musculus RIKEN cDNA B230206H07 gene (B230206H07Rik), mRNA.
Rundc1	155.2	117.6	122.6	1.04252	119.9	122.4	1.02085	175.6	144.3	-1.21691	Mus musculus RUN domain containing 1 (Rundc1), mRNA.
Spata22	64.6	62.4	64.8	1.03846	64.3	64.2	-1.00156	73.5	60.4	-1.21689	Mus musculus spermatogenesis associated 22 (Spata22), mRNA.
LOC100041504	79.1	71.7	78	1.08787	82.5	74.1	-1.11336	83.1	68.3	-1.21669	PREDICTED: Mus musculus similar to beta chemokine Exodus-2 (LOC100041504), mRNA.
Mycbp2	176.2	165.2	164.6	-1.00365	170	162.5	-1.04615	197.1	162	-1.21667	Mus musculus MYC binding protein 2 (Mycbp2), mRNA.
Cd28	78.4	82.3	70.6	-1.16572	77	81.4	1.05714	84.8	69.7	-1.21664	Mus musculus CD28 antigen (Cd28), mRNA.
Vps18	700.4	576	604.9	1.05017	415.3	517.5	1.24609	546	448.8	-1.21658	Mus musculus vacuolar protein sorting 18 (yeast) (Vps18), mRNA.
Riok3	1241.6	1292.9	1234.7	-1.04714	1437.4	1330.9	-1.08002	1927.1	1584.1	-1.21653	Mus musculus RIO kinase 3 (yeast) (Riok3), mRNA.
Abi3	264.1	267	267.2	1.00075	181.6	186.3	1.02588	202.4	166.4	-1.21635
Fcho2	662	729.2	738.8	1.01317	444.6	447.1	1.00562	477.9	393	-1.21603	Mus musculus FCH domain only 2 (Fcho2), mRNA.
Jmjd2a	111.3	105.8	119.5	1.12949	134.7	139.5	1.03563	212.8	175	-1.216	Mus musculus jumonji domain containing 2A (Jmjd2a), mRNA.
Mocs2	728.6	610.2	684.8	1.12225	622.3	617.3	-1.0081	907	746	-1.21582	Mus musculus molybdenum cofactor synthesis 2 (Mocs2), mRNA.
Tmem63c	73.6	75.6	78.1	1.03307	75.4	83.4	1.1061	86.8	71.4	-1.21569	Mus musculus transmembrane protein 63c (Tmem63c), mRNA.
2410004A20Rik	88.3	84.7	84.9	1.00236	89.6	85.3	-1.05041	101.6	83.6	-1.21531	Mus musculus RIKEN cDNA 2410004A20 gene (2410004A20Rik), mRNA.
EG545370	63.8	70.5	73.1	1.03688	72.1	65.7	-1.09741	70.6	58.1	-1.21515	Mus musculus predicted gene, EG545370 (EG545370), mRNA.
Cldn16	78.8	74.3	74.5	1.00269	74.4	74.6	1.00269	104.5	86	-1.21512	Mus musculus claudin 16 (Cldn16), mRNA.
Dusp28	151.8	142.3	150.5	1.05762	132.7	138.5	1.04371	173.5	142.8	-1.21499	Mus musculus dual specificity phosphatase 28 (Dusp28), mRNA.
Smyd3	70.1	64.4	66.9	1.03882	63.2	64.4	1.01899	75.2	61.9	-1.21486	Mus musculus SET and MYND domain containing 3 (Smyd3), mRNA.
Tlcd2	77.3	83.2	88.1	1.05889	93.2	119.6	1.28326	125	102.9	-1.21477	Mus musculus TLC domain containing 2 (Tlcd2), mRNA.
2310036O22Rik	2397.9	2086.2	2418.6	1.15933	2268.1	2068.3	-1.0966	2510.8	2066.9	-1.21477	Mus musculus RIKEN cDNA 2310036O22 gene (2310036O22Rik), mRNA.
Bcl6	1638.7	1598.7	1567	-1.02023	1728.6	1586.6	-1.0895	1379.1	1135.3	-1.21475	Mus musculus B-cell leukemia/lymphoma 6 (Bcl6), mRNA.
Grid2	81.7	82.3	77.6	-1.06057	80.7	77.4	-1.04264	78.7	64.8	-1.21451
Olfr571	77.5	73	81.2	1.11233	86.4	75.7	-1.14135	90.6	74.6	-1.21448	Mus musculus olfactory receptor 571 (Olfr571), mRNA.
Rock1	243.1	255.5	268.8	1.05205	258.3	286.8	1.11034	302	248.7	-1.21431	Mus musculus Rho-associated coiled-coil containing protein kinase 1 (Rock1), mRNA.
Scap	200.1	206.2	223.3	1.08293	218.4	204.8	-1.06641	229	188.6	-1.21421	Mus musculus SREBF chaperone (Scap), mRNA.
Ap1g1	409.7	433.9	436.1	1.00507	455	450.7	-1.00954	507.7	418.2	-1.21401	Mus musculus adaptor protein complex AP-1, gamma 1 subunit (Ap1g1), mRNA.
Fam132b	78.7	81	81.5	1.00617	69.6	79.3	1.13937	72.1	59.4	-1.2138	Mus musculus family with sequence similarity 132, member B (Fam132b), mRNA.
BC057627	224.1	197.7	216.9	1.09712	161.6	210.7	1.30384	218.4	180	-1.21333	Mus musculus cDNA sequence BC057627 (BC057627), mRNA.
Pde1b	323.7	306.1	304.5	-1.00525	476.7	613.4	1.28676	658.9	543.1	-1.21322	Mus musculus phosphodiesterase 1B, Ca2+-calmodulin dependent (Pde1b), mRNA.
Rnf139	90.4	95.2	87.8	-1.08428	92.3	87.2	-1.05849	111.6	92	-1.21304	Mus musculus ring finger protein 139 (Rnf139), mRNA.
Slc35b4	917.7	940.1	860.1	-1.09301	657.7	663.1	1.00821	671.9	553.9	-1.21303	Mus musculus solute carrier family 35, member B4 (Slc35b4), mRNA.
Polr2a	68.5	65.1	65.2	1.00154	63.5	61.4	-1.0342	68.9	56.8	-1.21303	Mus musculus polymerase (RNA) II (DNA directed) polypeptide A (Polr2a), mRNA.
Ubash3a	64.1	62.2	62.9	1.01125	64.4	62.9	-1.02385	68.9	56.8	-1.21303	Mus musculus ubiquitin associated and SH3 domain containing, A (Ubash3a), mRNA.
Slc4a1ap	499.6	517.5	468.5	-1.10459	415.1	381.6	-1.08779	489.2	403.3	-1.21299	Mus musculus solute carrier family 4 (anion exchanger), member 1, adaptor protein (Slc4a1ap), mRNA.
Rnf215	130.8	115.1	110.5	-1.04163	112.9	121	1.07174	148.1	122.1	-1.21294	Mus musculus ring finger protein 215 (Rnf215), mRNA.
Hist1h3h	74.1	64.2	72.7	1.1324	65.1	73.1	1.12289	75.2	62	-1.2129	Mus musculus histone cluster 1, H3h (Hist1h3h), mRNA.
4930504E06Rik	967.8	1023.8	1017	-1.00669	1130.5	1247.6	1.10358	1272.1	1048.9	-1.21279	Mus musculus RIKEN cDNA 4930504E06 gene (4930504E06Rik), mRNA.
Lrp1	104	111.7	115.8	1.03671	109.2	107.7	-1.01393	130	107.2	-1.21269	Mus musculus low density lipoprotein receptor-related protein 1 (Lrp1), mRNA.
Ccdc137	257.8	191.9	173.5	-1.10605	180.4	168.6	-1.06999	260.2	214.6	-1.21249	Mus musculus coiled-coil domain containing 137 (Ccdc137), mRNA.
Pemt	131.2	123.2	135.8	1.10227	131.8	137.8	1.04552	148.4	122.4	-1.21242	Mus musculus phosphatidylethanolamine N-methyltransferase (Pemt), nuclear gene encoding mitochondrial protein, mRNA.
Dctn1	102.6	104.2	103.6	-1.00579	91.9	88.9	-1.03375	106.2	87.6	-1.21233	Mus musculus dynactin 1 (Dctn1), mRNA.
2210012G02Rik	163.8	153.8	149.5	-1.02876	114.1	114.5	1.00351	158.2	130.5	-1.21226	Mus musculus RIKEN cDNA 2210012G02 gene (2210012G02Rik), mRNA.
H2-Q8	1246.2	1457.7	1266.8	-1.15069	1547.4	1498.5	-1.03263	2245.3	1852.2	-1.21223	Mus musculus histocompatibility 2, Q region locus 8 (H2-Q8), mRNA.
Acin1	123.1	127.1	120.2	-1.0574	128.8	126	-1.02222	136	112.2	-1.21212	Mus musculus apoptotic chromatin condensation inducer 1 (Acin1), transcript variant 1, mRNA.
Golga2	280.1	293.1	263.5	-1.11233	240.8	253.1	1.05108	263.6	217.5	-1.21195
0610031J06Rik	982.8	948.6	928.5	-1.02165	971.8	1057.2	1.08788	1087	897.1	-1.21168	Mus musculus RIKEN cDNA 0610031J06 gene (0610031J06Rik), mRNA.
Wdr33	121.6	120.6	128.4	1.06468	101	110.8	1.09703	116.2	95.9	-1.21168	Mus musculus WD repeat domain 33 (Wdr33), mRNA.
9130404D08Rik	211.4	214.7	228.7	1.06521	182.2	190.4	1.04501	212.7	175.6	-1.21128	Mus musculus RIKEN cDNA 9130404D08 gene (9130404D08Rik), mRNA.
Gca	133.3	141.4	144.8	1.02405	138.9	152.3	1.09647	175.6	145	-1.21103	Mus musculus grancalcin (Gca), mRNA.
Ftl1	72.4	69.4	80.1	1.15418	79.6	79.5	-1.00126	92.5	76.4	-1.21073	Mus musculus ferritin light chain 1 (Ftl1), mRNA.
Rhoc	582.5	635.9	623.3	-1.02021	1047.7	877.5	-1.19396	1513.5	1250.1	-1.2107	Mus musculus ras homolog gene family, member C (Rhoc), mRNA.
Tmem214	175.9	169.5	167.8	-1.01013	164.7	175.2	1.06375	181.6	150	-1.21067	Mus musculus transmembrane protein 214 (Tmem214), mRNA.
Lypd4	77.1	72.1	81	1.12344	76.6	74.9	-1.0227	86.8	71.7	-1.2106	Mus musculus Ly6/Plaur domain containing 4 (Lypd4), mRNA.
4930503L19Rik	94.8	85.8	87.6	1.02098	99.3	94.1	-1.05526	119	98.3	-1.21058	Mus musculus RIKEN cDNA 4930503L19 gene (4930503L19Rik), mRNA. XM_001001515
Ap3s2	148.9	147.4	137.3	-1.07356	132.1	137.6	1.04164	148.9	123	-1.21057	Mus musculus adaptor-related protein complex 3, sigma 2 subunit (Ap3s2), mRNA.
Ddah1	62.1	60.9	62.9	1.03284	57.2	60.1	1.0507	67.3	55.6	-1.21043
Rfwd2	189.5	221.7	211.2	-1.04972	233.3	225.4	-1.03505	274.4	226.7	-1.21041	Mus musculus ring finger and WD repeat domain 2 (Rfwd2), mRNA.
3110023B02Rik	186.9	135.4	135.3	-1.00074	138.2	126.9	-1.08905	194.5	160.7	-1.21033	Mus musculus RIKEN cDNA 3110023B02 gene (3110023B02Rik), mRNA.
Cndp1	66.3	61.2	68	1.11111	66.3	64.9	-1.02157	77.7	64.2	-1.21028	Mus musculus carnosine dipeptidase 1 (metallopeptidase M20 family) (Cndp1), mRNA.
Olfr1102	75.7	60.4	67.7	1.12086	67.8	77.3	1.14012	78.3	64.7	-1.2102	Mus musculus olfactory receptor 1102 (Olfr1102), mRNA.
Lcor	91.6	102.4	108.1	1.05566	93.2	93.7	1.00536	116.3	96.1	-1.2102	Mus musculus ligand dependent nuclear receptor corepressor (Lcor), mRNA.
Slc23a2	962.7	963.6	1024.4	1.0631	872.7	1137.6	1.30354	1248.1	1031.4	-1.2101	Mus musculus solute carrier family 23 (nucleobase transporters), member 2 (Slc23a2), mRNA.
4931409K22Rik	69.4	69.3	64.7	-1.0711	65.4	62.4	-1.04808	74.3	61.4	-1.2101	Mus musculus RIKEN cDNA 4931409K22 gene (4931409K22Rik), mRNA.
Hpcal1	220	207.9	223.3	1.07407	231.7	244.7	1.05611	324.3	268	-1.21007	Mus musculus hippocalcin-like 1 (Hpcal1), mRNA.
Anks1	130	126.2	130	1.03011	112.6	106.7	-1.0553	152.8	126.3	-1.20982	Mus musculus ankyrin repeat and SAM domain containing 1 (Anks1), mRNA.
Midn	826.5	848.5	850.2	1.002	817.5	1140.6	1.39523	839	693.5	-1.20981	Mus musculus midnolin (Midn), mRNA.
Fam171a1	87.3	70.8	87.7	1.2387	68.8	86.3	1.25436	84.2	69.6	-1.20977	Mus musculus family with sequence similarity 171, member A1 (Fam171a1), mRNA.
Khdrbs1	823.1	810	838.4	1.03506	833.7	896.6	1.07545	991	819.2	-1.20972	Mus musculus KH domain containing, RNA binding, signal transduction associated 1 (Khdrbs1), mRNA.
Olfr484	63.3	54.1	64.8	1.19778	59.5	59.5	1	70.5	58.3	-1.20926	Mus musculus olfactory receptor 484 (Olfr484), mRNA.
1700011A15Rik	59	62.5	59.3	-1.05396	65.1	62.9	-1.03498	70.5	58.3	-1.20926	Mus musculus RIKEN cDNA 1700011A15 gene (1700011A15Rik), mRNA.
Sqstm1	4108.7	5557.9	5397.4	-1.02974	9896.2	11849.7	1.1974	10918.3	9028.9	-1.20926	Mus musculus sequestosome 1 (Sqstm1), mRNA.
D3Wsu161e	64.9	61.4	61.6	1.00326	62.9	62.4	-1.00801	75.2	62.2	-1.209
Ppp1r3c	88.9	92.7	101	1.08954	101.3	97.2	-1.04218	112.8	93.3	-1.209	Mus musculus protein phosphatase 1, regulatory (inhibitor) subunit 3C (Ppp1r3c), mRNA.
Cwc15	63.8	65	61.8	-1.05178	65	68.8	1.05846	72.9	60.3	-1.20896	Mus musculus CWC15 homolog (S. cerevisiae) (Cwc15), mRNA.
Trim14	103.8	100.3	100.6	1.00299	85.7	83	-1.03253	138.9	114.9	-1.20888	Mus musculus tripartite motif-containing 14 (Trim14), mRNA.
Snx10	2340	2582.2	2307	-1.11929	2829.3	2930.5	1.03577	3551.8	2938.1	-1.20888	Mus musculus sorting nexin 10 (Snx10), mRNA.
Nmt2	63.8	67.7	62.9	-1.07631	66.6	60.7	-1.0972	74.1	61.3	-1.20881	Mus musculus N-myristoyltransferase 2 (Nmt2), mRNA.
Spata2L	99.3	91.2	91.9	1.00768	77	74	-1.04054	91	75.3	-1.2085	Mus musculus spermatogenesis associated 2-like (Spata2L), mRNA.
Limk2	176.7	182.5	174.8	-1.04405	123.5	124.1	1.00486	166.4	137.7	-1.20842	Mus musculus LIM motif-containing protein kinase 2 (Limk2), transcript variant 1, mRNA.
Msl3l2	70.2	71.9	69.4	-1.03602	72.5	63.7	-1.13815	72.5	60	-1.20833	Mus musculus male-specific lethal 3-like 2 (Drosophila) (Msl3l2), non-coding RNA.
Chchd5	254.8	181.4	179.2	-1.01228	135.3	136.3	1.00739	177	146.5	-1.20819	Mus musculus coiled-coil-helix-coiled-coil-helix domain containing 5 (Chchd5), mRNA.
Wdr1	2618.5	2770	2599.8	-1.06547	3160.8	3224.2	1.02006	3750.9	3104.8	-1.2081	Mus musculus WD repeat domain 1 (Wdr1), mRNA.
Znrf1	76.9	76	76.3	1.00395	80.4	73.4	-1.09537	95.8	79.3	-1.20807	Mus musculus zinc and ring finger 1 (Znrf1), mRNA.
Ddhd1	91.8	95.8	98	1.02296	93	106.2	1.14194	135.3	112	-1.20804
Serpinb1a	72.7	76.1	66.3	-1.14781	72.7	60.1	-1.20965	87.7	72.6	-1.20799	Mus musculus serine (or cysteine) peptidase inhibitor, clade B, member 1a (Serpinb1a), mRNA.
Rcc2	108.6	113.5	109.8	-1.0337	112.5	110.9	-1.01443	125.5	103.9	-1.20789	Mus musculus regulator of chromosome condensation 2 (Rcc2), mRNA.
Fbxl18	96.2	96.1	97.2	1.01145	94	88	-1.06818	108.2	89.6	-1.20759	Mus musculus F-box and leucine-rich repeat protein 18 (Fbxl18), mRNA.
Ptbp1	1500.8	1564.4	1546.6	-1.01151	1352.8	1593.9	1.17822	1564.9	1295.9	-1.20758	Mus musculus polypyrimidine tract binding protein 1 (Ptbp1), transcript variant 2, mRNA.
Med12	313.5	294.9	308.3	1.04544	308.6	318.5	1.03208	377.6	312.7	-1.20755	Mus musculus mediator of RNA polymerase II transcription, subunit 12 homolog (yeast) (Med12), mRNA.
Slc27a3	102.2	95	86.6	-1.097	74.5	87.2	1.17047	108.3	89.7	-1.20736
C330016O10Rik	85.4	83.1	80.1	-1.03745	77.5	77	-1.00649	96.2	79.7	-1.20703
Il1rap	96	97.1	95.4	-1.01782	96.4	110.2	1.14315	145.3	120.4	-1.20681	Mus musculus interleukin 1 receptor accessory protein (Il1rap), transcript variant 1, mRNA.
Rab40c	959.2	867.2	837.6	-1.03534	304.4	304.1	-1.00099	507.1	420.2	-1.20681	Mus musculus Rab40c, member RAS oncogene family (Rab40c), mRNA.
Fibcd1	66.2	69.9	69.5	-1.00576	67.6	70.6	1.04438	82.9	68.7	-1.2067	Mus musculus fibrinogen C domain containing 1 (Fibcd1), mRNA.
Olfr1340	78.6	73	78	1.06849	72.9	68.2	-1.06891	78.3	64.9	-1.20647	Mus musculus olfactory receptor 1340 (Olfr1340), mRNA.
Ttc4	272.1	275.6	271.6	-1.01473	250	256.9	1.0276	335.5	278.1	-1.2064	Mus musculus tetratricopeptide repeat domain 4 (Ttc4), mRNA.
Slc30a7	1249.9	1476.7	1461.6	-1.01033	1533.8	1534.4	1.00039	1799.2	1491.4	-1.20638	Mus musculus solute carrier family 30 (zinc transporter), member 7 (Slc30a7), mRNA.
Ocln	73.3	67.5	71.2	1.05481	71.9	70.5	-1.01986	77.3	64.1	-1.20593	Mus musculus occludin (Ocln), mRNA.
Mmp2	70.7	71.7	72.4	1.00976	69.2	74.4	1.07514	77.3	64.1	-1.20593	Mus musculus matrix metallopeptidase 2 (Mmp2), mRNA.
Hcls1	1518.8	1513.6	1493.8	-1.01325	1827.9	2026.6	1.1087	2842.7	2357.5	-1.20581	Mus musculus hematopoietic cell specific Lyn substrate 1 (Hcls1), mRNA.
Samd11	72	69.9	80.6	1.15308	75.1	75.9	1.01065	83.8	69.5	-1.20576	Mus musculus sterile alpha motif domain containing 11 (Samd11), mRNA.
Ptgs2	72.9	89.9	78.6	-1.14377	113	104.1	-1.08549	200.5	166.3	-1.20565
9630041N07Rik	77.2	72.7	70.7	-1.02829	69.3	72.5	1.04618	73.9	61.3	-1.20555	Mus musculus RIKEN cDNA 9630041N07 gene (9630041N07Rik), mRNA.
Srrm2	238	217	201.3	-1.07799	241.2	241.3	1.00041	251.9	209	-1.20526	Mus musculus serine/arginine repetitive matrix 2 (Srrm2), mRNA.
2510012J08Rik	412	383.7	365.6	-1.04951	310.1	286.2	-1.08351	310.1	257.3	-1.20521	Mus musculus RIKEN cDNA 2510012J08 gene (2510012J08Rik), mRNA.
Brsk1	61.2	68.6	66.2	-1.03625	63.1	68.2	1.08082	74.6	61.9	-1.20517	Mus musculus BR serine/threonine kinase 1 (Brsk1), mRNA.
Lpcat4	147.6	138.5	134.1	-1.03281	137.2	134.1	-1.02312	154.5	128.2	-1.20515	Mus musculus lysophosphatidylcholine acyltransferase 4 (Lpcat4), mRNA.
Hmha1	712.7	555.4	630.7	1.13558	469	460.9	-1.01757	384.5	319.1	-1.20495	Mus musculus histocompatibility (minor) HA-1 (Hmha1), mRNA.
Fktn	153.2	145.8	143.8	-1.01391	134.5	116.5	-1.15451	151.1	125.4	-1.20494	Mus musculus fukutin (Fktn), mRNA.
Cd37	369.1	375.8	369.5	-1.01705	414	360	-1.15	436.3	362.1	-1.20492	Mus musculus CD37 antigen (Cd37), mRNA.
Camk1d	102.3	102.7	104.6	1.0185	108.7	119.6	1.10028	128.2	106.4	-1.20489	Mus musculus calcium/calmodulin-dependent protein kinase ID (Camk1d), mRNA.
Gns	1199.5	1245.5	1156.7	-1.07677	1086.6	1221.4	1.12406	1139.8	946	-1.20486	Mus musculus glucosamine (N-acetyl)-6-sulfatase (Gns), mRNA.
Bat2	195.9	181.3	196.1	1.08163	199.9	218.5	1.09305	236.2	196.1	-1.20449	Mus musculus HLA-B associated transcript 2 (Bat2), mRNA.
C330023M02Rik	2214.3	2601.2	2538.8	-1.02458	2346.3	2385.1	1.01654	3210.1	2665.7	-1.20422	Mus musculus RIKEN cDNA C330023M02 gene (C330023M02Rik), mRNA.
LOC100048858	91	86.9	87	1.00115	97.5	123.9	1.27077	137.4	114.1	-1.20421	PREDICTED: Mus musculus similar to Ribosomal protein S6 kinase, polypeptide 2 (LOC100048858), mRNA.
1200016B10Rik	250.2	286.3	273.2	-1.04795	257.4	239.8	-1.07339	373.9	310.5	-1.20419	Mus musculus RIKEN cDNA 1200016B10 gene (1200016B10Rik), mRNA.
Tnrc6a	484.9	424.5	443.5	1.04476	411.6	446.3	1.08431	488	405.3	-1.20405	Mus musculus trinucleotide repeat containing 6a (Tnrc6a), mRNA.
Vmn2r29	73.1	77.6	81.1	1.0451	79.4	71.1	-1.11674	90.9	75.5	-1.20397	Mus musculus vomeronasal 2, receptor 29 (Vmn2r29), transcript variant 2, transcribed RNA.
Vat1	502.5	553.2	487.7	-1.1343	508.6	526.9	1.03598	582.6	483.9	-1.20397	Mus musculus vesicle amine transport protein 1 homolog (T californica) (Vat1), mRNA.
Zfml	346.6	317.3	365.4	1.15159	337.1	334.4	-1.00807	385	319.8	-1.20388	Mus musculus zinc finger, matrin-like (Zfml), mRNA.
Usp4	397	390.1	371.5	-1.05007	372.1	399.6	1.0739	413	343.1	-1.20373	Mus musculus ubiquitin specific peptidase 4 (proto-oncogene) (Usp4), mRNA.
Map3k7ip2	1105.9	1075.8	1085.3	1.00883	1095.7	1053.3	-1.04025	1425.6	1184.4	-1.20365	Mus musculus mitogen-activated protein kinase kinase kinase 7 interacting protein 2 (Map3k7ip2), mRNA.
Sprr2g	68.4	73	72.6	-1.00551	73	70.1	-1.04137	82.2	68.3	-1.20351	Mus musculus small proline-rich protein 2G (Sprr2g), non-coding RNA.
2600001B17Rik	275.6	271.4	292	1.0759	299.4	287.6	-1.04103	318.3	264.5	-1.2034
Trex1	1457.4	1841	1965.9	1.06784	2593.8	2282.6	-1.13634	3059.4	2542.6	-1.20326	Mus musculus three prime repair exonuclease 1 (Trex1), transcript variant 2, mRNA.
Btbd12	474.4	388.9	374.6	-1.03817	324.7	305.4	-1.0632	416.2	345.9	-1.20324	Mus musculus BTB (POZ) domain containing 12 (Btbd12), mRNA.
Hsd17b11	271	257.2	273.6	1.06376	264.1	244.5	-1.08016	285.5	237.3	-1.20312	Mus musculus hydroxysteroid (17-beta) dehydrogenase 11 (Hsd17b11), mRNA.
2600011C06Rik	78.1	85.4	78.3	-1.09068	79.9	78.7	-1.01525	82.4	68.5	-1.20292
Zfp366	75.6	77.9	77.3	-1.00776	78.6	72.4	-1.08564	83.6	69.5	-1.20288	Mus musculus zinc finger protein 366 (Zfp366), mRNA.
Pycard	69.8	69.3	69.5	1.00289	70.3	69	-1.01884	75.3	62.6	-1.20288	Mus musculus PYD and CARD domain containing (Pycard), mRNA.
Ranbp2	167.7	184.6	152.8	-1.20812	194.4	243.7	1.2536	253.8	211	-1.20284	Mus musculus RAN binding protein 2 (Ranbp2), mRNA.
Copg	210.7	206	220.8	1.07184	230.1	239	1.03868	262.7	218.4	-1.20284
Zfp251	371	309.9	302	-1.02616	165.4	158.2	-1.04551	256.8	213.5	-1.20281	Mus musculus zinc finger protein 251 (Zfp251), mRNA.
Oas3	213.2	211.7	203.5	-1.04029	245.7	228.6	-1.0748	257.4	214	-1.2028	Mus musculus 2'-5' oligoadenylate synthetase 3 (Oas3), mRNA.
Atf4	4715.8	4647	4583.2	-1.01392	2756.5	3023.3	1.09679	3132.6	2604.6	-1.20272	Mus musculus activating transcription factor 4 (Atf4), mRNA.
Magohb	137.2	130.3	143.2	1.099	165.3	168.2	1.01754	224.4	186.6	-1.20257	Mus musculus mago-nashi homolog B (Drosophila) (Magohb), mRNA.
0610037L13Rik	462	444.2	477.2	1.07429	508.2	523.1	1.02932	637.6	530.3	-1.20234	Mus musculus RIKEN cDNA 0610037L13 gene (0610037L13Rik), mRNA.
B930041G04	59.5	63	55.8	-1.12903	55	59.7	1.08545	62.4	51.9	-1.20231	Mus musculus hypothetical protein B930041G04 (B930041G04), mRNA.
Pabpc4l	80.5	81.5	66.5	-1.22556	68.7	81.4	1.18486	75.5	62.8	-1.20223	Mus musculus poly(A)-binding protein, cytoplasmic pseudogene (Pabpc4l) on chromosome 14.
Mdh1b	64.2	69.2	66.5	-1.0406	63	62.8	-1.00318	65.4	54.4	-1.20221	Mus musculus malate dehydrogenase 1B, NAD (soluble) (Mdh1b), mRNA.
Ccdc110	69	62.4	69.8	1.11859	66.4	62.8	-1.05732	69	57.4	-1.20209	Mus musculus coiled-coil domain containing 110 (Ccdc110), mRNA.
Avp	75.1	71.6	78.8	1.10056	76.6	79	1.03133	85.1	70.8	-1.20198	Mus musculus arginine vasopressin (Avp), mRNA.
Ier5l	137.7	122.3	115.1	-1.06255	117.7	101	-1.16535	204.8	170.4	-1.20188	Mus musculus immediate early response 5-like (Ier5l), mRNA.
B230209C24Rik	91.1	87.8	98.2	1.11845	100.7	106.5	1.0576	115.5	96.1	-1.20187	Mus musculus RIKEN cDNA B230209C24 gene (B230209C24Rik), mRNA.
Igf2r	327.1	305	315	1.03279	370.9	394.5	1.06363	452.5	376.5	-1.20186	Mus musculus insulin-like growth factor 2 receptor (Igf2r), mRNA.
D5Wsu178e	301.5	282.3	292.2	1.03507	255.9	253.1	-1.01106	281.3	234.1	-1.20162	Mus musculus DNA segment, Chr 5, Wayne State University 178, expressed (D5Wsu178e), mRNA.
Tyk2	413.5	421.6	403.8	-1.04408	386.8	398.8	1.03102	523.4	435.6	-1.20156	Mus musculus tyrosine kinase 2 (Tyk2), mRNA.
Spata2	86.4	83.8	85.9	1.02506	84.7	87.8	1.0366	100.2	83.4	-1.20144	Mus musculus spermatogenesis associated 2 (Spata2), mRNA.
Olfr740	74.1	73	71.3	-1.02384	68.6	69.9	1.01895	91.3	76	-1.20132	Mus musculus olfactory receptor 740 (Olfr740), mRNA.
Krt10	76.9	72.4	73.5	1.01519	73.4	74	1.00817	83	69.1	-1.20116	Mus musculus keratin 10 (Krt10), mRNA.
Gaa	418.8	391.9	390.7	-1.00307	386.9	402.7	1.04084	433.8	361.2	-1.201	Mus musculus glucosidase, alpha, acid (Gaa), mRNA.
Spin2	64.4	59.4	75.1	1.26431	73.2	65.3	-1.12098	73.5	61.2	-1.20098	Mus musculus spindlin family, member 2 (Spin2), mRNA.
Akt1s1	286.8	281	316	1.12456	255.8	254.9	-1.00353	304.8	253.8	-1.20095	Mus musculus AKT1 substrate 1 (proline-rich) (Akt1s1), mRNA.
6030490I01Rik	72	68.2	70.5	1.03372	64.4	66.4	1.03106	79.5	66.2	-1.20091
Rsf1	110.6	113.2	108.6	-1.04236	98.9	92.2	-1.07267	114.2	95.1	-1.20084	Mus musculus remodeling and spacing factor 1 (Rsf1), mRNA.
LOC100044324	331.1	337.9	334.6	-1.00986	220.1	186.1	-1.1827	251.2	209.2	-1.20076	PREDICTED: Mus musculus similar to euchromatic histone methyltransferase 1 (LOC100044324), mRNA.
Dlx2	62.2	58.2	57.1	-1.01926	60.5	64.1	1.0595	68.2	56.8	-1.2007	Mus musculus distal-less homeobox 2 (Dlx2), mRNA.
Gpr135	64.8	78.3	62.9	-1.24483	67.3	66.5	-1.01203	74.2	61.8	-1.20065	Mus musculus G protein-coupled receptor 135 (Gpr135), mRNA.
Tcf21	72.5	68.4	73.8	1.07895	68.3	72.8	1.06589	77.2	64.3	-1.20062	Mus musculus transcription factor 21 (Tcf21), mRNA.
St8sia6	63.6	67.9	68.4	1.00736	59	69.8	1.18305	70.7	58.9	-1.20034	Mus musculus ST8 alpha-N-acetyl-neuraminide alpha-2,8-sialyltransferase 6 (St8sia6), mRNA.
Chst7	109.5	110.9	100	-1.109	93.5	93.3	-1.00214	145	120.8	-1.20033	Mus musculus carbohydrate (N-acetylglucosamino) sulfotransferase 7 (Chst7), mRNA.
2810485I05Rik	835.1	725.6	628.3	-1.15486	378.9	406.5	1.07284	548.3	456.8	-1.20031	Mus musculus RIKEN cDNA 2810485I05 gene (2810485I05Rik), mRNA.
Yipf4	107.1	100.9	105.1	1.04163	94.8	105.9	1.11709	103.8	86.5	-1.2	Mus musculus Yip1 domain family, member 4 (Yipf4), mRNA.
Rec8	65.2	67.7	67.6	-1.00148	64.3	61.3	-1.04894	72	60	-1.2	Mus musculus REC8 homolog (yeast) (Rec8), mRNA.
Anxa6	663.6	709.9	733	1.03254	655.9	696.5	1.0619	851.5	709.6	-1.19997	Mus musculus annexin A6 (Anxa6), mRNA.
Commd5	538.5	510.2	456.7	-1.11714	401.7	376	-1.06835	571.9	476.6	-1.19996	Mus musculus COMM domain containing 5 (Commd5), mRNA.
Egln2	137.6	127	140.4	1.10551	128.6	129.7	1.00855	157.4	131.2	-1.1997	Mus musculus EGL nine homolog 2 (C. elegans) (Egln2), mRNA.
Olfr1098	65.9	66.8	68.8	1.02994	69.4	61.1	-1.13584	72.7	60.6	-1.19967	Mus musculus olfactory receptor 1098 (Olfr1098), mRNA.
Rragd	71.5	74.7	74.2	-1.00674	72	69.7	-1.033	84.2	70.2	-1.19943
Tmem16b	69.5	71.6	73.4	1.02514	67.2	73.3	1.09077	78.8	65.7	-1.19939	Mus musculus transmembrane protein 16B (Tmem16b), mRNA.
6330416G13Rik	184.5	187.9	174.8	-1.07494	112.2	125.7	1.12032	181.1	151	-1.19934	Mus musculus RIKEN cDNA 6330416G13 gene (6330416G13Rik), mRNA.
Cryba2	70.5	68.8	75.7	1.10029	74.4	78.7	1.0578	78.9	65.8	-1.19909	Mus musculus crystallin, beta A2 (Cryba2), mRNA.
Tram1l1	69.3	62.5	71	1.136	70.3	70.3	1	77.7	64.8	-1.19907	Mus musculus translocation associated membrane protein 1-like 1 (Tram1l1), mRNA.
C330019L16Rik	66.9	66.7	65.8	-1.01368	61.6	66.4	1.07792	68.7	57.3	-1.19895	Mus musculus RIKEN cDNA C330019L16 gene (C330019L16Rik), mRNA. XM_924349
Denr	145	140.5	143	1.01779	156.6	178.9	1.1424	257.5	214.8	-1.19879	Mus musculus density-regulated protein (Denr), mRNA.
Gpx3	73.1	67.2	62	-1.08387	70.1	64.2	-1.0919	78.4	65.4	-1.19878	Mus musculus glutathione peroxidase 3 (Gpx3), transcript variant 2, mRNA.
Qrich1	82.2	86.4	79.7	-1.08407	77.3	88.6	1.14618	97.1	81	-1.19877	Mus musculus glutamine-rich 1 (Qrich1), mRNA.
Atpbd4	58.6	63	62.2	-1.01286	58	64.1	1.10517	73.6	61.4	-1.1987	Mus musculus ATP binding domain 4 (Atpbd4), mRNA.
Edc4	325.3	342.7	314.1	-1.09105	337.8	362.2	1.07223	366.5	305.8	-1.1985	Mus musculus enhancer of mRNA decapping 4 (Edc4), mRNA.
Tigd4	66.2	60.4	64.3	1.06457	63.1	75.9	1.20285	73.1	61	-1.19836	Mus musculus tigger transposable element derived 4 (Tigd4), mRNA.
Jph2	79.9	81.7	87.7	1.07344	78.5	89.4	1.13885	99.1	82.7	-1.19831	Mus musculus junctophilin 2 (Jph2), mRNA.
Ap1g2	108.6	116.3	117.7	1.01204	112.7	107.5	-1.04837	126.9	105.9	-1.1983	Mus musculus adaptor protein complex AP-1, gamma 2 subunit (Ap1g2), mRNA.
Dnahc8	72.8	75.7	81.3	1.07398	80.9	71.2	-1.13624	82.8	69.1	-1.19826	Mus musculus dynein, axonemal, heavy chain 8 (Dnahc8), mRNA.
Zfp352	67.9	65.3	64.6	-1.01084	73	68	-1.07353	68.9	57.5	-1.19826	Mus musculus zinc finger protein 352 (Zfp352), mRNA.
Ehd4	7564.9	8265.9	7589.3	-1.08915	5541.7	6034.4	1.08891	5252.4	4384.4	-1.19797	Mus musculus EH-domain containing 4 (Ehd4), mRNA.
5330439C02Rik	77.2	72	68.4	-1.05263	63.5	65.9	1.0378	81.1	67.7	-1.19793	PREDICTED: Mus musculus RIKEN cDNA 5330439C02 gene, transcript variant 3 (5330439C02Rik), mRNA.
Dlg4	76.1	76.4	77.6	1.01571	78.6	81.3	1.03435	77.5	64.7	-1.19784	Mus musculus discs, large homolog 4 (Drosophila) (Dlg4), mRNA.
D3Bwg0562e	75.7	75.1	80.4	1.07057	78.2	70.7	-1.10608	75.1	62.7	-1.19777	Mus musculus DNA segment, Chr 3, Brigham & Women's Genetics 0562 expressed (D3Bwg0562e), mRNA.
Fgr	340.6	365.5	350.8	-1.0419	559.3	512	-1.09238	1272.6	1062.5	-1.19774	Mus musculus Gardner-Rasheed feline sarcoma viral (Fgr) oncogene homolog (Fgr), mRNA.
Slfnl1	80.8	75.6	89.9	1.18915	80.5	84.2	1.04596	93.9	78.4	-1.1977	Mus musculus schlafen like 1 (Slfnl1), mRNA.
Cst10	73.3	74.4	79.5	1.06855	76.8	78.9	1.02734	78.8	65.8	-1.19757	Mus musculus cystatin 10 (chondrocytes) (Cst10), mRNA.
Slc15a4	442.6	377	404.1	1.07188	314.1	277.5	-1.13189	280.1	233.9	-1.19752	Mus musculus solute carrier family 15, member 4 (Slc15a4), mRNA.
Tlr7	1444.7	1508.3	1457.7	-1.03471	1346	1572.4	1.1682	1482.8	1238.3	-1.19745	Mus musculus toll-like receptor 7 (Tlr7), mRNA.
Rnf167	147.5	144.8	140.6	-1.02987	115.8	120.1	1.03713	146.2	122.1	-1.19738	Mus musculus ring finger protein 167 (Rnf167), mRNA.
Iqsec3	74.5	76.6	68.3	-1.12152	70.5	62.9	-1.12083	81.9	68.4	-1.19737
V1rh12	66.7	63.9	70.1	1.09703	66.6	66.7	1.0015	69.2	57.8	-1.19723	Mus musculus vomeronasal 1 receptor, H12 (V1rh12), mRNA.
Armcx2	86.2	86.9	84.1	-1.03329	83.5	88	1.05389	102	85.2	-1.19718	Mus musculus armadillo repeat containing, X-linked 2 (Armcx2), mRNA.
Taf7	69	72.8	64.2	-1.13396	57.2	76.3	1.33392	71.7	59.9	-1.19699	Mus musculus TAF7 RNA polymerase II, TATA box binding protein (TBP)-associated factor (Taf7), mRNA.
LOC637082	105.6	103.1	99.1	-1.04036	82.9	78.3	-1.05875	113.7	95	-1.19684	PREDICTED: Mus musculus similar to TIFA, transcript variant 1 (LOC637082), mRNA.
Olfr1085	81.9	77.7	81.7	1.05148	82.1	78.5	-1.04586	88.2	73.7	-1.19674	Mus musculus olfactory receptor 1085 (Olfr1085), mRNA.
Olfr984	72.3	69.1	71.7	1.03763	65.9	69	1.04704	73	61	-1.19672	Mus musculus olfactory receptor 984 (Olfr984), mRNA.
Clec4a1	73	80.5	76.6	-1.05091	77.9	78.8	1.01155	85.2	71.2	-1.19663	Mus musculus C-type lectin domain family 4, member a1 (Clec4a1), mRNA.
Yy2	93.9	91.2	97.2	1.06579	94.5	94.7	1.00212	112.6	94.1	-1.1966	Mus musculus Yy2 transcription factor (Yy2), mRNA.
Magea1	65.9	64.3	69.6	1.08243	70.1	58.7	-1.19421	70	58.5	-1.19658	Mus musculus melanoma antigen, family A, 1 (Magea1), mRNA.
P4ha1	128.2	121.1	118.5	-1.02194	117.7	111.9	-1.05183	115.1	96.2	-1.19647	Mus musculus procollagen-proline, 2-oxoglutarate 4-dioxygenase (proline 4-hydroxylase), alpha 1 polypeptide (P4ha1), mRNA.
D130043K22Rik	71.3	75	77.3	1.03067	79.8	74.3	-1.07402	81	67.7	-1.19645	Mus musculus RIKEN cDNA D130043K22 gene (D130043K22Rik), mRNA.
Npy	85.5	90.5	81	-1.11728	86.1	99.8	1.15912	113.3	94.7	-1.19641	Mus musculus neuropeptide Y (Npy), mRNA.
Tspan2	69.6	73.3	71.6	-1.02374	66.8	66	-1.01212	71.9	60.1	-1.19634	Mus musculus tetraspanin 2 (Tspan2), mRNA.
Spns1	231.7	249.5	226.5	-1.10155	238	265.6	1.11597	252.4	211	-1.19621	Mus musculus spinster homolog 1 (Drosophila) (Spns1), mRNA.
D030051N19Rik	254.8	250.3	257.4	1.02837	204.6	224.3	1.09629	275.1	230	-1.19609
Scotin	3176.4	3287.2	3175.2	-1.03527	3272.7	3448.8	1.05381	3875.1	3240.3	-1.19591	Mus musculus scotin gene (Scotin), transcript variant 2, mRNA.
Rab33b	237	231.8	220.6	-1.05077	232.5	253.4	1.08989	244.2	204.2	-1.19589	Mus musculus RAB33B, member of RAS oncogene family (Rab33b), mRNA.
Dst	76.7	74.8	75	1.00267	73.3	75.6	1.03138	91.6	76.6	-1.19582	Mus musculus dystonin (Dst), transcript variant b, mRNA.
Kat2b	107.6	117.1	116.1	-1.00861	107	105.6	-1.01326	122.8	102.7	-1.19572	Mus musculus K(lysine) acetyltransferase 2B (Kat2b), mRNA.
Gm239	64.7	65.9	67.4	1.02276	73.8	68	-1.08529	71.5	59.8	-1.19565	Mus musculus gene model 239, (NCBI) (Gm239), mRNA.
5930434B04Rik	158.8	147.5	150.3	1.01898	126.3	111.9	-1.12869	141.2	118.1	-1.1956	Mus musculus RIKEN cDNA 5930434B04 gene (5930434B04Rik), mRNA.
Hspa8	12274.9	13043.4	13381.2	1.0259	11639.4	13381.2	1.14965	15352.6	12842.8	-1.19542	Mus musculus heat shock protein 8 (Hspa8), mRNA.
Hmgcll1	54.6	56	54.1	-1.03512	59.2	57.2	-1.03497	62.4	52.2	-1.1954	Mus musculus 3-hydroxymethyl-3-methylglutaryl-Coenzyme A lyase-like 1 (Hmgcll1), mRNA.
Rhox5	155.5	159.6	147.4	-1.08277	166	176	1.06024	187.4	156.8	-1.19515	Mus musculus reproductive homeobox 5 (Rhox5), mRNA.
Hoxc4	88.5	74.4	84.4	1.13441	82.5	91	1.10303	96.2	80.5	-1.19503
Ogfod2	115.9	107.8	115.2	1.06865	112.8	115.1	1.02039	127	106.3	-1.19473	Mus musculus 2-oxoglutarate and iron-dependent oxygenase domain containing 2 (Ogfod2), mRNA.
Nkain4	83.4	94.5	81	-1.16667	86.9	86.9	1	103.1	86.3	-1.19467	Mus musculus Na+/K+ transporting ATPase interacting 4 (Nkain4), mRNA.
Plekhm3	190.6	219.2	203.1	-1.07927	250	310.4	1.2416	210.5	176.2	-1.19467	Mus musculus pleckstrin homology domain containing, family M, member 3 (Plekhm3), mRNA.
Pgs1	3809.7	3711.7	3736.8	1.00676	3413.4	3551.8	1.04055	4932.1	4128.7	-1.19459	Mus musculus phosphatidylglycerophosphate synthase 1 (Pgs1), mRNA.
A630033H20Rik	67.3	70.3	66	-1.06515	58.6	69.7	1.18942	76.8	64.3	-1.1944	Mus musculus RIKEN cDNA A630033H20 gene (A630033H20Rik), mRNA.
Rnf145	393.3	355.2	346	-1.02659	309.3	299.5	-1.03272	391	327.4	-1.19426	Mus musculus ring finger protein 145 (Rnf145), mRNA.
Pola2	466	443.7	458.8	1.03403	487.5	505.6	1.03713	520.8	436.1	-1.19422	Mus musculus polymerase (DNA directed), alpha 2 (Pola2), mRNA.
Mon1b	221.9	236.3	230.5	-1.02516	260.7	265.5	1.01841	341.3	285.8	-1.19419	Mus musculus MON1 homolog b (yeast) (Mon1b), transcript variant 1, mRNA.
Serpinb9c	74.2	77.3	70.4	-1.09801	75.1	69.4	-1.08213	89.2	74.7	-1.19411	Mus musculus serine (or cysteine) peptidase inhibitor, clade B, member 9c (Serpinb9c), mRNA.
Olfr447	62.2	66.7	65.1	-1.02458	56.8	61	1.07394	68.9	57.7	-1.19411	Mus musculus olfactory receptor 447 (Olfr447), mRNA.
Aplnr	77.9	72	73.5	1.02083	60.8	68.2	1.12171	76.3	63.9	-1.19405	Mus musculus apelin receptor (Aplnr), mRNA.
A530032D15Rik	62.2	68.9	65.6	-1.0503	65.4	67.9	1.03823	76.3	63.9	-1.19405	Mus musculus RIKEN cDNA A530032D15Rik gene (A530032D15Rik), mRNA.
Ms4a1	82.5	84.6	75.2	-1.125	78.3	85.6	1.09323	97.9	82	-1.1939
V1rh14	69.7	72.2	75.9	1.05125	72.1	63.6	-1.13365	83.8	70.2	-1.19373	Mus musculus vomeronasal 1 receptor, H14 (V1rh14), mRNA.
Tmem120a	454.8	426.2	439	1.03003	602.2	652.3	1.08319	898.9	753.1	-1.1936	Mus musculus transmembrane protein 120A (Tmem120a), mRNA.
Olfr1216	70.1	64.4	63.9	-1.00782	71.6	72.3	1.00978	76.5	64.1	-1.19345	Mus musculus olfactory receptor 1216 (Olfr1216), mRNA.
Zfp817	111.5	87.2	103.1	1.18234	110.6	111.3	1.00633	134.5	112.7	-1.19343	Mus musculus zinc finger protein 817 (Zfp817), mRNA.
Prl2b1	66.1	63.3	67.9	1.07267	66.1	66.5	1.00605	80.9	67.8	-1.19322	Mus musculus prolactin family 2, subfamily b, member 1 (Prl2b1), mRNA.
Crtc3	135.2	135.8	134.7	-1.00817	124.2	122.8	-1.0114	143.3	120.1	-1.19317	Mus musculus CREB regulated transcription coactivator 3 (Crtc3), mRNA.
Polr2c	55	56.2	58.6	1.0427	59.7	58.7	-1.01704	62.4	52.3	-1.19312	Mus musculus polymerase (RNA) II (DNA directed) polypeptide C (Polr2c), mRNA.
D17H6S53E	76.2	78.6	86.2	1.09669	76.1	75.9	-1.00264	91.6	76.8	-1.19271	Mus musculus DNA segment, Chr 17, human D6S53E (D17H6S53E), mRNA.
Fxyd6	66.1	64.8	62.2	-1.0418	57.3	67.1	1.17103	76.9	64.5	-1.19225	Mus musculus FXYD domain-containing ion transport regulator 6 (Fxyd6), mRNA.
Traf3ip2	109	112.3	104.7	-1.07259	104.2	106.7	1.02399	144	120.8	-1.19205	Mus musculus Traf3 interacting protein 2 (Traf3ip2), mRNA.
1110007C09Rik	76.5	70.8	76.6	1.08192	71.6	90.5	1.26397	91.3	76.6	-1.19191	Mus musculus RIKEN cDNA 1110007C09 gene (1110007C09Rik), mRNA.
Ehf	66.9	60.7	59.5	-1.02017	58.1	55.7	-1.04309	66.5	55.8	-1.19176	Mus musculus ets homologous factor (Ehf), mRNA.
4930474N05Rik	73.3	80.5	86.5	1.07453	76.9	81.4	1.05852	82.7	69.4	-1.19164	Mus musculus RIKEN cDNA 4930474N05 gene (4930474N05Rik), mRNA.
Kcnv2	77.8	77.5	71.8	-1.07939	78	75.4	-1.03448	85.2	71.5	-1.19161	Mus musculus potassium channel, subfamily V, member 2 (Kcnv2), mRNA.
Zfp825	129.2	111.8	115.8	1.03578	121.7	123.5	1.01479	121.9	102.3	-1.19159	Mus musculus zinc finger protein 825 (Zfp825), mRNA.
Klhdc6	71.1	75.2	71.2	-1.05618	74.5	73	-1.02055	82.2	69	-1.1913	Mus musculus kelch domain containing 6 (Klhdc6), mRNA.
Rab8b	2831	2673.9	2507.3	-1.06645	3839.8	4253.4	1.10771	5112.5	4291.7	-1.19125	Mus musculus RAB8B, member RAS oncogene family (Rab8b), mRNA.
Tbx1	73.8	78.3	77	-1.01688	75.6	76	1.00529	89.7	75.3	-1.19124	Mus musculus T-box 1 (Tbx1), mRNA.
Noc3l	351.4	343.7	349.7	1.01746	382.3	367.5	-1.04027	442.4	371.4	-1.19117	Mus musculus nucleolar complex associated 3 homolog (S. cerevisiae) (Noc3l), mRNA.
1110002N22Rik	517.9	453.3	499.7	1.10236	592.5	577.2	-1.02651	965.3	810.4	-1.19114	Mus musculus RIKEN cDNA 1110002N22 gene (1110002N22Rik), mRNA.
Gna12	106.2	101.3	120.8	1.1925	95.4	95.2	-1.0021	111	93.2	-1.19099	Mus musculus guanine nucleotide binding protein, alpha 12 (Gna12), mRNA.
Erlin2	193	193.6	188.9	-1.02488	184.8	195.6	1.05844	218.3	183.3	-1.19094	Mus musculus ER lipid raft associated 2 (Erlin2), mRNA.
Ly6g5b	78.2	72.2	68.8	-1.04942	71.3	78.7	1.10379	81.1	68.1	-1.1909	Mus musculus lymphocyte antigen 6 complex, locus G5B (Ly6g5b), mRNA.
Pip5k1a	963	955.1	1001.3	1.04837	1302	1379.6	1.0596	1375.6	1155.1	-1.19089	Mus musculus phosphatidylinositol-4-phosphate 5-kinase, type 1 alpha (Pip5k1a), mRNA.
Gcap14	169.8	164.9	164.4	-1.00304	138.3	130.2	-1.06221	167.2	140.4	-1.19088	Mus musculus granule cell antiserum positive 14 (Gcap14), transcript variant 1, mRNA.
BC057893	174.1	166.6	162.1	-1.02776	138.4	133.5	-1.0367	177.2	148.8	-1.19086	Mus musculus cDNA sequence BC057893 (BC057893), mRNA.
Tcn2	88.5	92.8	88.5	-1.04859	85.9	95.9	1.11641	96.1	80.7	-1.19083	Mus musculus transcobalamin 2 (Tcn2), mRNA.
Alox12e	58.2	62.4	70.1	1.1234	66	66.8	1.01212	66.8	56.1	-1.19073	Mus musculus arachidonate lipoxygenase, epidermal (Alox12e), mRNA.
Wdr70	251.6	227.4	217.5	-1.04552	229.2	240	1.04712	313.1	263	-1.19049	PREDICTED: Mus musculus WD repeat domain 70, transcript variant 3 (Wdr70), mRNA.
8430410K20Rik	1072.3	1003	964.6	-1.03981	866.9	927.2	1.06956	1096.4	921	-1.19045	Mus musculus RIKEN cDNA 8430410K20 gene (8430410K20Rik), mRNA.
Gbx1	64.7	71.7	70.6	-1.01558	69.1	63	-1.09683	71.3	59.9	-1.19032	Mus musculus gastrulation brain homeobox 1 (Gbx1), mRNA.
F2rl3	68.6	67.6	59.7	-1.13233	72.6	65.3	-1.11179	70.7	59.4	-1.19024	Mus musculus coagulation factor II (thrombin) receptor-like 3 (F2rl3), mRNA.
Tiparp	77.5	76.9	80.6	1.04811	81.8	82.1	1.00367	87.6	73.6	-1.19022	Mus musculus TCDD-inducible poly(ADP-ribose) polymerase (Tiparp), mRNA.
Sfxn5	84.4	86.9	83.2	-1.04447	81	86.6	1.06914	89.5	75.2	-1.19016	Mus musculus sideroflexin 5 (Sfxn5), mRNA.
Lonrf1	109.5	108	108.3	1.00278	149.4	114.4	-1.30594	131.5	110.5	-1.19005	Mus musculus LON peptidase N-terminal domain and ring finger 1 (Lonrf1), mRNA.
Sdcbp2	67.3	72.6	72.5	-1.00138	70.1	74.4	1.06134	80.8	67.9	-1.18999	Mus musculus syndecan binding protein (syntenin) 2 (Sdcbp2), mRNA.
Wdr18	219.8	225.8	202.7	-1.11396	146	158.5	1.08562	182.4	153.3	-1.18982	Mus musculus WD repeat domain 18 (Wdr18), mRNA. XM_914259 XM_923132 XM_923137 XM_923141 XM_923147
Mgat4a	154.9	187.7	197.8	1.05381	253.3	225.6	-1.12278	366.1	307.7	-1.1898	Mus musculus mannoside acetylglucosaminyltransferase 4, isoenzyme A (Mgat4a), mRNA.
Yars2	64.2	56.1	72.3	1.28877	65.1	66.3	1.01843	74.6	62.7	-1.18979	Mus musculus tyrosyl-tRNA synthetase 2 (mitochondrial) (Yars2), nuclear gene encoding mitochondrial protein, mRNA.
Glyat	92.8	97.7	105.2	1.07677	110.5	94.6	-1.16808	109.8	92.3	-1.1896	Mus musculus glycine-N-acyltransferase (Glyat), nuclear gene encoding mitochondrial protein, mRNA.
Cyp8b1	76.1	69.3	74.1	1.06926	75	68.7	-1.0917	75.3	63.3	-1.18957	Mus musculus cytochrome P450, family 8, subfamily b, polypeptide 1 (Cyp8b1), mRNA.
Adcy10	67.8	65.8	66.5	1.01064	61.2	65.5	1.07026	83.5	70.2	-1.18946	Mus musculus adenylate cyclase 10 (Adcy10), mRNA.
Plcd1	84.1	94.6	95.3	1.0074	82.7	90.7	1.09674	99.2	83.4	-1.18945
Gpr120	85.9	96.3	91.9	-1.04788	89.1	83.8	-1.06325	103.6	87.1	-1.18944	Mus musculus G protein-coupled receptor 120 (Gpr120), mRNA.
Tgfbrap1	564.6	544.7	529.3	-1.0291	381.1	380.9	-1.00053	434.2	365.1	-1.18926	Mus musculus transforming growth factor, beta receptor associated protein 1 (Tgfbrap1), mRNA.
Laptm4a	2538.1	2618.1	2572.4	-1.01777	2544.3	2697.8	1.06033	3137.3	2638.3	-1.18914	Mus musculus lysosomal-associated protein transmembrane 4A (Laptm4a), mRNA.
Lrrc25	85.1	81.7	83	1.01591	119.5	110.9	-1.07755	221.1	186	-1.18871	Mus musculus leucine rich repeat containing 25 (Lrrc25), mRNA.
Stk11	413.4	377.4	394.9	1.04637	356.5	352.3	-1.01192	354.1	297.9	-1.18865	Mus musculus serine/threonine kinase 11 (Stk11), mRNA.
Kcna5	68.7	71.8	66.1	-1.08623	64.6	66.3	1.02632	78.8	66.3	-1.18854	Mus musculus potassium voltage-gated channel, shaker-related subfamily, member 5 (Kcna5), mRNA.
9130218O11Rik	72	68.9	75	1.08853	76	75.9	-1.00132	78.2	65.8	-1.18845	Mus musculus RIKEN cDNA 9130218O11 gene (9130218O11Rik), mRNA.
Aox3	69.9	73.8	72	-1.025	77.5	74.1	-1.04588	75.1	63.2	-1.18829	Mus musculus aldehyde oxidase 3 (Aox3), mRNA.
Ankfn1	66.8	63.7	72.2	1.13344	63.7	69.2	1.08634	72.6	61.1	-1.18822	Mus musculus ankyrin-repeat and fibronectin type III domain containing 1 (Ankfn1), mRNA.
Vtn	74	64.8	72.1	1.11265	66.8	75.8	1.13473	76.4	64.3	-1.18818	Mus musculus vitronectin (Vtn), mRNA.
LOC100038893	71.8	69.7	74.2	1.06456	72.7	72	-1.00972	80.2	67.5	-1.18815	PREDICTED: Mus musculus hypothetical protein LOC100038893 (LOC100038893), mRNA.
EG240916	64	62.8	67.5	1.07484	61.9	62.5	1.00969	70.1	59	-1.18814	Mus musculus predicted gene, EG240916 (EG240916), mRNA.
Tln1	112.7	97.4	128.7	1.32136	108.8	119.2	1.09559	145.9	122.8	-1.18811
Acot7	2895.8	2898.2	2873.8	-1.00849	2767.5	2829.2	1.02229	3786.6	3187.1	-1.1881	Mus musculus acyl-CoA thioesterase 7 (Acot7), mRNA.
Decr2	108.3	107	116.2	1.08598	107	103.1	-1.03783	109.3	92	-1.18804
Mpp1	1411.1	1393.3	1365.9	-1.02006	1435	1378.7	-1.04084	1877	1580	-1.18797	Mus musculus membrane protein, palmitoylated (Mpp1), mRNA.
Thap11	1446.5	1110.9	1196.8	1.07732	546.6	456.7	-1.19685	866.6	729.5	-1.18794	Mus musculus THAP domain containing 11 (Thap11), mRNA.
Adam23	71.3	66.9	68.3	1.02093	68.2	66.7	-1.02249	75.9	63.9	-1.18779	Mus musculus a disintegrin and metallopeptidase domain 23 (Adam23), mRNA.
Hoxa11	74.3	70.4	65.5	-1.07481	73	64.9	-1.12481	77.8	65.5	-1.18779	Mus musculus homeo box A11 (Hoxa11), mRNA.
Ms4a8a	63.4	60.6	64.7	1.06766	63.9	77	1.20501	73.4	61.8	-1.1877	Mus musculus membrane-spanning 4-domains, subfamily A, member 8A (Ms4a8a), mRNA.
EG667977	2293.7	2345.2	2439.5	1.04021	2703	2898.2	1.07222	3945.9	3323.1	-1.18742	Mus musculus predicted gene, EG667977 (EG667977), mRNA.
Pvrl4	74.6	80.6	83.6	1.03722	73.8	70.9	-1.0409	81.1	68.3	-1.18741	Mus musculus poliovirus receptor-related 4 (Pvrl4), mRNA.
Neurod4	63.7	71.9	65.6	-1.09604	69.7	65.4	-1.06575	75.4	63.5	-1.1874	Mus musculus neurogenic differentiation 4 (Neurod4), mRNA.
Cherp	585.7	530.4	565.8	1.06674	560.8	571.1	1.01837	523.2	440.7	-1.1872	Mus musculus calcium homeostasis endoplasmic reticulum protein (Cherp), mRNA.
Sap30l	895.3	857.5	924.4	1.07802	794.9	828.2	1.04189	919.6	774.6	-1.18719	Mus musculus SAP30-like (Sap30l), mRNA.
Unc93b1	2178.1	2191.5	2170.6	-1.00963	2097.8	2097.7	-1.00005	2527.6	2129.5	-1.18695	Mus musculus unc-93 homolog B1 (C. elegans) (Unc93b1), mRNA.
Olfr213	74.9	74	87.1	1.17703	80.2	79.4	-1.01008	90.8	76.5	-1.18693	Mus musculus olfactory receptor 213 (Olfr213), mRNA.
Zfp646	80.5	73.7	71.7	-1.02789	72.6	64.6	-1.12384	82	69.1	-1.18669	Mus musculus zinc finger protein 646 (Zfp646), mRNA.
Ahrr	121.3	121.3	125.3	1.03298	101.5	88.6	-1.1456	89	75	-1.18667	Mus musculus aryl-hydrocarbon receptor repressor (Ahrr), mRNA.
Nkain2	87.3	98.1	94.6	-1.037	91	84.8	-1.07311	103	86.8	-1.18664	Mus musculus Na+/K+ transporting ATPase interacting 2 (Nkain2), transcript variant 2, mRNA.
Itga1	73.8	72.3	72.8	1.00692	69.5	69	-1.00725	80.8	68.1	-1.18649	Mus musculus integrin alpha 1 (Itga1), mRNA.
Kif1c	84.4	87.8	85.5	-1.0269	95.9	83.5	-1.1485	94.8	79.9	-1.18648	Mus musculus kinesin family member 1C (Kif1c), mRNA.
Tnfaip3	192.5	2947.8	2710.3	-1.08763	1573.3	1534.1	-1.02555	1865.6	1572.4	-1.18647	Mus musculus tumor necrosis factor, alpha-induced protein 3 (Tnfaip3), mRNA.
Zfp551	94.9	88.6	84	-1.05476	80.8	80.4	-1.00498	89.8	75.7	-1.18626	Mus musculus zinc fingr protein 551 (Zfp551), mRNA. XM_921380 XM_921386 XM_921391 XM_921394
Stk11ip	101.2	95.5	102.5	1.0733	101.5	110.1	1.08473	112.8	95.1	-1.18612	Mus musculus serine/threonine kinase 11 interacting protein (Stk11ip), mRNA.
Abcc6	77.4	77.3	75.9	-1.01845	75.9	72.7	-1.04402	85.4	72	-1.18611	Mus musculus ATP-binding cassette, sub-family C (CFTR/MRP), member 6 (Abcc6), mRNA.
Med10	707.2	689.5	820.1	1.18941	803.6	894.8	1.11349	1029.3	867.8	-1.1861	Mus musculus mediator of RNA polymerase II transcription, subunit 10 homolog (NUT2, S. cerevisiae) (Med10), mRNA.
Mill1	78.6	87	79	-1.10127	81.9	84	1.02564	83.5	70.4	-1.18608	Mus musculus MHC I like leukocyte 1 (Mill1), mRNA.
Pqbp1	141.4	146.7	147	1.00204	163	160.3	-1.01684	158.1	133.3	-1.18605	Mus musculus polyglutamine binding protein 1 (Pqbp1), mRNA.
V1rh6	78.2	75.1	80.1	1.06658	81.9	71.8	-1.14067	86.1	72.6	-1.18595	Mus musculus vomeronasal 1 receptor, H6 (V1rh6), mRNA.
Nup93	1507.2	1538	1531.5	-1.00424	1356	1535.5	1.13237	1745.6	1472.1	-1.18579
Map4k2	137.9	133.2	133.6	1.003	155	128.8	-1.20342	138.5	116.8	-1.18579	Mus musculus mitogen-activated protein kinase kinase kinase kinase 2 (Map4k2), mRNA.
4921505C17Rik	198.2	174.3	180.7	1.03672	171.4	186.5	1.0881	217.7	183.6	-1.18573	Mus musculus RIKEN cDNA 4921505C17 gene (4921505C17Rik), mRNA.
Slc25a38	1155.8	972.7	1036.5	1.06559	603.2	608	1.00796	750.6	633.1	-1.18559	Mus musculus solute carrier family 25, member 38 (Slc25a38), mRNA.
Gas8	199.4	209.7	184	-1.13967	218.3	220.3	1.00916	269.8	227.6	-1.18541
Lrrn4cl	72.7	78.4	74.6	-1.05094	77.3	80.3	1.03881	79.3	66.9	-1.18535	Mus musculus LRRN4 C-terminal like (Lrrn4cl), mRNA.
Lefty2	64.5	61.8	66.8	1.08091	64.3	64.8	1.00778	75.5	63.7	-1.18524	Mus musculus Left-right determination factor 2 (Lefty2), mRNA.
Sulf1	76.1	77.7	74.2	-1.04717	74.3	77.9	1.04845	81.3	68.6	-1.18513	Mus musculus sulfatase 1 (Sulf1), mRNA.
Zzef1	56.5	56.1	64.9	1.15686	53.7	61.5	1.14525	71.7	60.5	-1.18512	Mus musculus zinc finger, ZZ-type with EF hand domain 1 (Zzef1), mRNA.
Tesp1	65.9	65.3	60.7	-1.07578	68.2	67	-1.01791	82.6	69.7	-1.18508	Mus musculus testicular serine protease 1 (Tesp1), mRNA.
Cacna1a	97.1	94.6	86.7	-1.09112	94.3	107.8	1.14316	106.3	89.7	-1.18506
Cd8a	68.9	65.1	68	1.04455	66.3	66.1	-1.00303	67.9	57.3	-1.18499	Mus musculus CD8 antigen, alpha chain (Cd8a), transcript variant 1, mRNA.
Kctd8	71.9	64	73.4	1.14688	71.2	68.3	-1.04246	69.2	58.4	-1.18493	Mus musculus potassium channel tetramerisation domain containing 8 (Kctd8), mRNA.
Slc13a4	61.7	68.6	65.4	-1.04893	63.9	72.8	1.13928	71.8	60.6	-1.18482	Mus musculus solute carrier family 13 (sodium/sulfate symporters), member 4 (Slc13a4), mRNA.
Traf5	95.4	101.3	94	-1.07766	100.5	124.3	1.23682	126.3	106.6	-1.1848	Mus musculus Tnf receptor-associated factor 5 (Traf5), mRNA.
Txndc1	229.5	202.4	234.6	1.15909	230.5	248.5	1.07809	270.6	228.4	-1.18476	Mus musculus thioredoxin domain containing 1 (Txndc1), mRNA.
Ormdl3	360.1	290.4	296.6	1.02135	226.6	224.1	-1.01116	286.1	241.5	-1.18468	Mus musculus ORM1-like 3 (S. cerevisiae) (Ormdl3), mRNA.
BC026590	479	432.4	433.5	1.00254	405.3	406.9	1.00395	396.5	334.7	-1.18464	Mus musculus cDNA sequence BC026590 (BC026590), mRNA.
BC027231	192.1	192.9	183.7	-1.05008	184.2	207.4	1.12595	240.7	203.2	-1.18455	Mus musculus cDNA sequence BC027231 (BC027231), mRNA.
Tmem171	81	81.9	92.3	1.12698	116.5	136.4	1.17082	157.3	132.8	-1.18449	Mus musculus transmembrane protein 171 (Tmem171), mRNA.
Gpa33	61.2	64.7	60	-1.07833	60.5	60.8	1.00496	68.7	58	-1.18448	Mus musculus glycoprotein A33 (transmembrane) (Gpa33), mRNA.
Cep170	122.9	135.4	134.4	-1.00744	129.8	116.6	-1.11321	143.2	120.9	-1.18445	Mus musculus centrosomal protein 170 (Cep170), mRNA.
Mdk	98.9	87.7	91.3	1.04105	89.4	92	1.02908	104.7	88.4	-1.18439	Mus musculus midkine (Mdk), transcript variant 2, mRNA.
Olfr520	66.5	71.6	64	-1.11875	70.1	65.3	-1.07351	77.1	65.1	-1.18433	Mus musculus olfactory receptor 520 (Olfr520), mRNA.
Clstn1	112.6	117.5	106.8	-1.10019	118.2	106.4	-1.1109	133	112.3	-1.18433
Sfrs2	3854.1	3972.7	4057.4	1.02132	3569.9	4143.8	1.16076	3867.2	3265.5	-1.18426	Mus musculus splicing factor, arginine/serine-rich 2 (SC-35) (Sfrs2), mRNA.
D10Ertd641e	1002.1	910.9	874	-1.04222	667.3	736.2	1.10325	767.1	647.8	-1.18416	Mus musculus DNA segment, Chr 10, ERATO Doi 641, expressed (D10Ertd641e), mRNA.
LOC100047911	611.3	529.5	544.9	1.02908	407.4	423.9	1.0405	491.3	414.9	-1.18414	PREDICTED: Mus musculus hypothetical protein LOC100047911 (LOC100047911), mRNA.
Lrrk1	499.9	514.6	523.6	1.01749	404.8	436.6	1.07856	592.3	500.2	-1.18413	Mus musculus leucine-rich repeat kinase 1 (Lrrk1), mRNA.
B230378H13Rik	83.5	86.6	83.3	-1.03962	91.9	86.2	-1.06613	106.8	90.2	-1.18404
Aldh7a1	79.4	78.9	77.6	-1.01675	87.9	84.8	-1.03656	85	71.8	-1.18384	Mus musculus aldehyde dehydrogenase family 7, member A1 (Aldh7a1), mRNA.
Znhit3	516	480.6	515.7	1.07303	530.4	500.2	-1.06038	815.8	689.2	-1.18369	Mus musculus zinc finger, HIT type 3 (Znhit3), mRNA.
4933409N07Rik	76.7	77.5	77.6	1.00129	72.1	78.9	1.09431	90.9	76.8	-1.18359
LOC677319	74.6	84.5	84	-1.00595	65.8	77.8	1.18237	71.6	60.5	-1.18347	PREDICTED: Mus musculus similar to putative protein phosphatase 1 nuclear targeting subunit (LOC677319), misc RNA.
Cep135	127.2	112.2	126.1	1.12389	117.1	123.8	1.05722	114.2	96.5	-1.18342	Mus musculus centrosomal protein 135 (Cep135), mRNA.
Olfr171	74.6	65.7	69.3	1.05479	72.7	74.4	1.02338	85.2	72	-1.18333	Mus musculus olfactory receptor 171 (Olfr171), mRNA.
Ccnd1	8484.2	8392.9	8291	-1.01229	6623.9	6553.6	-1.01073	6846.3	5785.8	-1.18329	Mus musculus cyclin D1 (Ccnd1), mRNA.
Atp13a1	1194.5	1046.5	1127	1.07692	1154.6	1158.7	1.00355	1406.5	1188.7	-1.18323	Mus musculus ATPase type 13A1 (Atp13a1), mRNA.
Zp3	67.9	63.5	68	1.07087	67.1	68	1.01341	78.2	66.1	-1.18306	Mus musculus zona pellucida glycoprotein 3 (Zp3), mRNA.
Olfr250	69.1	68.6	62.9	-1.09062	63.1	70.3	1.1141	72.4	61.2	-1.18301	Mus musculus olfactory receptor 250 (Olfr250), mRNA.
Dear1	61.7	68.7	66.7	-1.02999	69.4	58	-1.19655	76.3	64.5	-1.18295	Mus musculus dual endothelin 1/angiotensin II receptor 1 homolog (rat) (Dear1), mRNA.
Atg12	714.5	583.6	624.2	1.06957	598.7	693.2	1.15784	681.3	576	-1.18281	Mus musculus autophagy-related 12 (yeast) (Atg12), mRNA.
Bcdin3d	108.4	95.2	101.7	1.06828	87.1	83	-1.0494	110	93	-1.1828	Mus musculus BCDIN3 domain containing (Bcdin3d), mRNA.
Nolc1	90.3	93.3	89	-1.04831	74.9	90.3	1.20561	83.5	70.6	-1.18272	Mus musculus nucleolar and coiled-body phosphoprotein 1 (Nolc1), transcript variant 4, mRNA.
Rxfp1	65.1	63.5	70.6	1.11181	74.2	65.8	-1.12766	76.4	64.6	-1.18266	Mus musculus relaxin/insulin-like family peptide receptor 1 (Rxfp1), mRNA.
Llgl2	250.5	251.4	262.6	1.04455	188	190	1.01064	253.4	214.3	-1.18245	Mus musculus lethal giant larvae homolog 2 (Drosophila) (Llgl2), mRNA.
3110056O03Rik	764.5	646.2	684.2	1.05881	500.4	530.7	1.06055	524.2	443.4	-1.18223	Mus musculus RIKEN cDNA 3110056O03 gene (3110056O03Rik), mRNA.
Olfr726	76.5	73.9	70.6	-1.04674	79.6	70.4	-1.13068	81.1	68.6	-1.18222
Tspan4	94.5	92.7	96	1.0356	109.3	91.2	-1.19846	110.3	93.3	-1.18221	Mus musculus tetraspanin 4 (Tspan4), mRNA.
Slc38a3	68.3	75.9	71	-1.06901	68.2	63.2	-1.07911	74	62.6	-1.18211	Mus musculus solute carrier family 38, member 3 (Slc38a3), mRNA.
Chst8	72.3	78.9	66.6	-1.18468	79.4	75.8	-1.04749	81.8	69.2	-1.18208	Mus musculus carbohydrate (N-acetylgalactosamine 4-0) sulfotransferase 8 (Chst8), mRNA.
Kcnip4	67.2	69.2	67	-1.03284	67.6	66.7	-1.01349	69.5	58.8	-1.18197
LOC100041649	66.6	71.3	70.1	-1.01712	65.3	67.9	1.03982	76	64.3	-1.18196	PREDICTED: Mus musculus similar to brain protein 44-like protein, transcript variant 1 (LOC100041649), mRNA.
Sfxn4	83.3	77.7	78.3	1.00772	75.1	76.1	1.01332	87.7	74.2	-1.18194	Mus musculus sideroflexin 4 (Sfxn4), mRNA.
1110059G10Rik	82.4	87.5	89.1	1.01829	98.1	87.5	-1.12114	89	75.3	-1.18194	Mus musculus RIKEN cDNA 1110059G10 gene (1110059G10Rik), mRNA.
Mpp4	74.6	78.2	67.3	-1.16196	76.8	74	-1.03784	80.6	68.2	-1.18182	Mus musculus membrane protein, palmitoylated 4 (MAGUK p55 subfamily member 4) (Mpp4), mRNA.
Il3ra	82	89.4	83.7	-1.0681	80.2	75.7	-1.05945	99.5	84.2	-1.18171	Mus musculus interleukin 3 receptor, alpha chain (Il3ra), mRNA.
Epdr1	75.6	67.6	71.9	1.06361	68.5	69.9	1.02044	74.2	62.8	-1.18153	Mus musculus ependymin related protein 1 (zebrafish) (Epdr1), mRNA.
Col10a1	66.7	64.1	64.9	1.01248	66	60.9	-1.08374	71.6	60.6	-1.18152
Lrrc16	68.3	63	65.9	1.04603	58.8	65.8	1.11905	68.4	57.9	-1.18135
Grm6	59.5	61.4	69.2	1.12704	63.1	58	-1.08793	71.7	60.7	-1.18122	Mus musculus glutamate receptor, metabotropic 6 (Grm6), mRNA.
Fcer1g	60.8	60.5	66.6	1.10083	70.3	72	1.02418	78.9	66.8	-1.18114
Slc4a1	65.4	69.4	60.4	-1.14901	68.2	63.5	-1.07402	80.9	68.5	-1.18102	Mus musculus solute carrier family 4 (anion exchanger), member 1 (Slc4a1), mRNA.
Tmem198	75.6	73.1	73	-1.00137	73.1	76.9	1.05198	86.2	73	-1.18082	Mus musculus transmembrane protein 198 (Tmem198), mRNA.
Zbtb7a	165.2	178.2	167.5	-1.06388	221.9	264.7	1.19288	212.9	180.3	-1.18081	Mus musculus zinc finger and BTB domain containing 7a (Zbtb7a), mRNA.
Hexim1	158.9	202.2	215.3	1.06479	154.1	352.2	2.28553	148.3	125.6	-1.18073	Mus musculus hexamethylene bis-acetamide inducible 1 (Hexim1), mRNA.
Ercc6	67.6	75.6	68.2	-1.1085	65.9	66.4	1.00759	74.5	63.1	-1.18067	Mus musculus excision repair cross-complementing rodent repair deficiency, complementation group 6 (Ercc6), mRNA.
Hnt	60.7	65.2	71.8	1.10123	68.4	63.4	-1.07886	73.2	62	-1.18065	Mus musculus neurotrimin (Hnt), mRNA.
Sdccag3	164.9	169.7	162.7	-1.04302	182.1	189.7	1.04174	201.3	170.5	-1.18065	Mus musculus serologically defined colon cancer antigen 3 (Sdccag3), transcript variant 2, mRNA.
Mcm10	1145.2	1110.2	1125.7	1.01396	840.9	741	-1.13482	947.2	802.3	-1.18061	Mus musculus minichromosome maintenance deficient 10 (S. cerevisiae) (Mcm10), mRNA.
Slc7a7	149.9	167	156.6	-1.06641	174.8	189	1.08124	223.3	189.2	-1.18023
Olfr1477	79.6	81.4	77.2	-1.0544	80.2	81.3	1.01372	93	78.8	-1.1802	Mus musculus olfactory receptor 1477 (Olfr1477), mRNA.
AU042651	73.9	68	77.8	1.14412	74.2	73.7	-1.00678	77.3	65.5	-1.18015	Mus musculus expressed sequence AU042651 (AU042651), mRNA.
Abcb1b	1150.5	1055.6	1132.1	1.07247	1245.5	1317	1.05741	1263.4	1070.6	-1.18009	Mus musculus ATP-binding cassette, sub-family B (MDR/TAP), member 1B (Abcb1b), mRNA.
Ccdc69	63.1	73.1	74.2	1.01505	64.6	75	1.16099	73.4	62.2	-1.18006	Mus musculus coiled-coil domain containing 69 (Ccdc69), mRNA.
Atp11c	108.1	104.9	95.5	-1.09843	112.8	122.6	1.08688	121.9	103.3	-1.18006	Mus musculus ATPase, class VI, type 11C (Atp11c), transcript variant 1, mRNA.
Defb10	76.7	78.1	79.1	1.0128	76.3	76.6	1.00393	83.9	71.1	-1.18003	Mus musculus defensin beta 10 (Defb10), mRNA.
4930504O13Rik	58.1	64.2	62.6	-1.02556	57.3	67.3	1.17452	64.9	55	-1.18	Mus musculus RIKEN cDNA 4930504O13 gene (4930504O13Rik), mRNA.
1810010M01Rik	60.1	59.4	60.8	1.02357	56.9	63.5	1.11599	70.8	60	-1.18	Mus musculus RIKEN cDNA 1810010M01 gene (1810010M01Rik), mRNA.
Fbxo2	89.5	90.1	86.6	-1.04042	83.4	91.6	1.09832	95.1	80.6	-1.1799	Mus musculus F-box protein 2 (Fbxo2), mRNA.
2900026A02Rik	74.4	78.2	79.5	1.01662	80.2	74.1	-1.08232	83.3	70.6	-1.17989	Mus musculus RIKEN cDNA 2900026A02 gene (2900026A02Rik), mRNA.
3830417A13Rik	67.6	71.7	73.7	1.02789	63.5	64.7	1.0189	74.8	63.4	-1.17981	Mus musculus RIKEN cDNA 3830417A13 gene (3830417A13Rik), mRNA.
C87436	172.8	167.3	170.1	1.01674	131.7	148.5	1.12756	160.2	135.8	-1.17968	Mus musculus expressed sequence C87436 (C87436), mRNA.
Lrrc59	475.2	431.3	435.2	1.00904	477.5	543.8	1.13885	654	554.4	-1.17965	Mus musculus leucine rich repeat containing 59 (Lrrc59), mRNA.
EG432436	69.6	74.2	74.1	-1.00135	75.3	73.5	-1.02449	82.1	69.6	-1.1796	Mus musculus predicted gene, EG432436 (EG432436), mRNA.
Ncoa7	64.6	68.4	67.3	-1.01634	69.7	72.9	1.04591	76.9	65.2	-1.17945	Mus musculus nuclear receptor coactivator 7 (Ncoa7), mRNA.
Rbm12	251.9	264	253.1	-1.04307	257.2	307.5	1.19557	276.2	234.2	-1.17933
1700021K02Rik	70.8	72.4	68.8	-1.05233	69	68.8	-1.00291	77	65.3	-1.17917	Mus musculus RIKEN cDNA 1700021K02 gene (1700021K02Rik), transcript variant 4, mRNA.
Rassf4	1156.4	1047.9	1047.1	-1.00076	1063	978.8	-1.08602	2301.7	1952	-1.17915	Mus musculus Ras association (RalGDS/AF-6) domain family member 4 (Rassf4), mRNA.
Zfp787	494.2	461.8	463.4	1.00346	476.5	517.1	1.0852	463.6	393.2	-1.17904	Mus musculus zinc finger protein 787 (Zfp787), mRNA.
Srd5a2	67.8	76.8	66.1	-1.16188	68.9	60.7	-1.13509	81	68.7	-1.17904
Ckap4	73	70	69.8	-1.00287	70.9	68.1	-1.04112	80.4	68.2	-1.17889	Mus musculus cytoskeleton-associated protein 4 (Ckap4), mRNA.
2310045A20Rik	70.9	63.1	72.2	1.14422	74.7	70.5	-1.05957	72.5	61.5	-1.17886	Mus musculus RIKEN cDNA 2310045A20 gene (2310045A20Rik), mRNA.
Hipk2	89.4	91.1	95.9	1.05269	82.3	80.7	-1.01983	116	98.4	-1.17886	Mus musculus homeodomain interacting protein kinase 2 (Hipk2), mRNA.
Creb5	143.6	112.9	118.1	1.04606	204.8	206.6	1.00879	211.7	179.6	-1.17873	Mus musculus cAMP responsive element binding protein 5 (Creb5), mRNA.
Gm1964	70.4	67.2	74.3	1.10565	73.1	68.1	-1.07342	73.9	62.7	-1.17863	Mus musculus gene model 1964, (NCBI) (Gm1964), mRNA. XM_902261 XM_902263 XM_905976 XM_919594 XM_919603 XM_919612 XM_919619 XM_919624 XM_919636 XM_919641
Tmem82	69.9	71.8	66.9	-1.07324	73.6	70.2	-1.04843	83.9	71.2	-1.17837	Mus musculus transmembrane protein 82 (Tmem82), mRNA.
Ncstn	759.2	779.1	751.9	-1.03618	823.7	828.3	1.00558	938.7	796.7	-1.17824	Mus musculus nicastrin (Ncstn), mRNA.
Cyp7a1	64.5	63.7	63.7	1	60.2	61	1.01329	80	67.9	-1.1782	Mus musculus cytochrome P450, family 7, subfamily a, polypeptide 1 (Cyp7a1), mRNA.
Mrs2	79.1	73.9	77	1.04195	74.8	78.3	1.04679	81.4	69.1	-1.178	Mus musculus MRS2 magnesium homeostasis factor homolog (S. cerevisiae) (Mrs2), mRNA.
Hyal6	65.7	64.5	61.3	-1.0522	64.8	55.3	-1.17179	66.2	56.2	-1.17794	Mus musculus hyaluronoglucosaminidase 6 (Hyal6), mRNA.
Serpina3g	64.9	73.4	69.1	-1.06223	72	60.5	-1.19008	84.1	71.4	-1.17787	Mus musculus serine (or cysteine) peptidase inhibitor, clade A, member 3G (Serpina3g), mRNA.
D11Moh35	193.8	176.7	180.1	1.01924	198.2	219.7	1.10848	282.1	239.5	-1.17787
Neurog3	69.7	63.4	76.8	1.21136	68.1	68.2	1.00147	75.5	64.1	-1.17785	Mus musculus neurogenin 3 (Neurog3), mRNA.
9530053A07Rik	65.2	65.3	66.8	1.02297	57.4	74	1.2892	66.9	56.8	-1.17782	Mus musculus RIKEN cDNA 9530053A07 gene (9530053A07Rik), mRNA.
Pign	325.4	364.7	332	-1.09849	339.6	347.2	1.02238	438.7	372.5	-1.17772	Mus musculus phosphatidylinositol glycan anchor biosynthesis, class N (Pign), mRNA.
Olfr1034	73.2	72.1	69.2	-1.04191	71.4	69.1	-1.03329	83.5	70.9	-1.17772	Mus musculus olfactory receptor 1034 (Olfr1034), mRNA.
Stt3a	204.4	206.5	190.7	-1.08285	202.3	206	1.01829	193.6	164.4	-1.17762	Mus musculus STT3, subunit of the oligosaccharyltransferase complex, homolog A (S. cerevisiae) (Stt3a), mRNA.
Hmga2	83.9	89	89.6	1.00674	98	88.7	-1.10485	122	103.6	-1.17761	Mus musculus high mobility group AT-hook 2 (Hmga2), mRNA.
Hip1	81.5	89.5	90.7	1.01341	79.5	70.6	-1.12606	75.6	64.2	-1.17757	Mus musculus huntingtin interacting protein 1 (Hip1), mRNA.
Dnajb3	66	68.2	59.2	-1.15203	72.7	68.9	-1.05515	74.3	63.1	-1.1775	Mus musculus DnaJ (Hsp40) homolog, subfamily B, member 3 (Dnajb3), mRNA.
App	1612.1	1643.1	1634.5	-1.00526	1774.3	1686.4	-1.05212	1929	1638.3	-1.17744
Arsi	77.9	90.1	80.1	-1.12484	83.2	79.2	-1.05051	84.3	71.6	-1.17737	Mus musculus arylsulfatase i (Arsi), mRNA.
Il1f6	69	68.5	76	1.10949	71.3	73.7	1.03366	81	68.8	-1.17733	Mus musculus interleukin 1 family, member 6 (Il1f6), mRNA.
Brwd2	156.1	167.6	163.6	-1.02445	165.4	191	1.15478	150.1	127.5	-1.17725	Mus musculus bromodomain and WD repeat domain containing 2 (Brwd2), mRNA.
Capn10	194.4	197.3	181.7	-1.08586	164.6	165.8	1.00729	190	161.4	-1.1772
Armcx5	140.1	153.5	153.3	-1.0013	146.6	154.3	1.05252	166.1	141.1	-1.17718	Mus musculus armadillo repeat containing, X-linked 5 (Armcx5), mRNA.
Necap1	496.8	479.4	499.7	1.04234	493.4	437.5	-1.12777	664.6	564.6	-1.17712	Mus musculus NECAP endocytosis associated 1 (Necap1), mRNA.
Gpr85	154.3	147.4	148.2	1.00543	116.7	122.5	1.0497	160.9	136.7	-1.17703	Mus musculus G protein-coupled receptor 85 (Gpr85), mRNA.
EG654453	70.2	69.6	63.1	-1.10301	66.9	60.8	-1.10033	75.8	64.4	-1.17702	Mus musculus predicted gene, EG654453 (EG654453), mRNA.
Olfr551	62.4	61.6	62.1	1.00812	61.9	60.6	-1.02145	72.5	61.6	-1.17695	Mus musculus olfactory receptor 551 (Olfr551), mRNA.
Ms4a4c	68.2	64.5	71.5	1.10853	67.8	66.5	-1.01955	73.2	62.2	-1.17685	Mus musculus membrane-spanning 4-domains, subfamily A, member 4C (Ms4a4c), mRNA.
Ino80e	161	163.1	166.4	1.02023	178.4	166.2	-1.07341	189	160.6	-1.17684	Mus musculus NO80 complex subunit E (Ino80e), mRNA.
LOC100039636	96.2	93.9	91.3	-1.02848	85.7	101.3	1.18203	122.5	104.1	-1.17675	PREDICTED: Mus musculus similar to vacuolar H(+)-ATPase (LOC100039636), mRNA.
Cdk9	311.3	301.2	323.8	1.07503	355.3	351.6	-1.01052	422.2	358.8	-1.1767	Mus musculus cyclin-dependent kinase 9 (CDC2-related kinase) (Cdk9), mRNA.
Irf5	1129.1	1150.1	1172.2	1.01922	1598.7	1309.2	-1.22113	1821.6	1548.1	-1.17667	Mus musculus interferon regulatory factor 5 (Irf5), mRNA.
EG114600	70.3	75.3	70.2	-1.07265	72.9	68	-1.07206	76	64.6	-1.17647	Mus musculus predicted gene, EG114600 (EG114600), mRNA.
Mfap3l	76.3	82.3	76.5	-1.07582	75.5	77.1	1.02119	100.7	85.6	-1.1764	Mus musculus microfibrillar-associated protein 3-like (Mfap3l), mRNA.
Gripap1	1170.8	988.5	1096.7	1.10946	1253.3	1497.1	1.19453	1535.4	1305.2	-1.17637	Mus musculus GRIP1 associated protein 1 (Gripap1), mRNA.
Cds2	77.3	82.8	89.2	1.07729	80.8	75.6	-1.06878	83.4	70.9	-1.1763	Mus musculus CDP-diacylglycerol synthase (phosphatidate cytidylyltransferase) 2 (Cds2), mRNA.
AA407659	737.4	663	654.1	-1.01361	567.6	601.7	1.06008	651.2	553.6	-1.1763	Mus musculus expressed sequence AA407659 (AA407659), mRNA.
Olfr792	68.2	61.7	68.4	1.10859	65.3	73.1	1.11945	69.4	59	-1.17627	Mus musculus olfactory receptor 792 (Olfr792), mRNA.
A530053G22Rik	65	67.7	69.4	1.02511	67.5	70.4	1.04296	74.8	63.6	-1.1761	PREDICTED: Mus musculus RIKEN cDNA A530053G22 gene (A530053G22Rik), misc RNA.
Olfr519	60.2	65.5	57.3	-1.14311	68.1	52.6	-1.29468	70.8	60.2	-1.17608	Mus musculus olfactory receptor 519 (Olfr519), mRNA.
Marcksl1	713.3	1415.1	1384.2	-1.02232	3059.3	3043.3	-1.00526	3920.9	3334.2	-1.17596	Mus musculus MARCKS-like 1 (Marcksl1), mRNA.
1810049H19Rik	56	56	59.9	1.06964	60.1	62.6	1.0416	67.5	57.4	-1.17596	Mus musculus RIKEN cDNA 1810049H19 gene (1810049H19Rik), mRNA.
2200001I15Rik	76.2	70.4	68.7	-1.02475	71.2	68.7	-1.03639	82.9	70.5	-1.17589	Mus musculus RIKEN cDNA 2200001I15 gene (2200001I15Rik), mRNA.
Apom	109.7	112.7	106	-1.06321	106.4	101.9	-1.04416	111.7	95	-1.17579	Mus musculus apolipoprotein M (Apom), mRNA.
Hook2	203.5	205.3	213.1	1.03799	208.4	211.2	1.01344	244.9	208.3	-1.17571	Mus musculus hook homolog 2 (Drosophila) (Hook2), mRNA.
6230427J02Rik	132.8	108.6	110.1	1.01381	87	87.2	1.0023	97.7	83.1	-1.17569	Mus musculus RIKEN cDNA 6230427J02 gene (6230427J02Rik), mRNA.
1700040L02Rik	69	67.4	64.8	-1.04012	68.6	75.2	1.09621	69.6	59.2	-1.17568	Mus musculus RIKEN cDNA 1700040L02 gene (1700040L02Rik), mRNA.
Eef2	2298.8	2242.5	2322.6	1.03572	1958.6	2163.6	1.10467	2592.9	2205.6	-1.1756	Mus musculus eukaryotic translation elongation factor 2 (Eef2), mRNA.
Uspl1	902.6	760.4	730.6	-1.04079	912.8	823.1	-1.10898	1077.3	916.4	-1.17558	Mus musculus ubiquitin specific peptidase like 1 (Uspl1), mRNA. XM_900481 XM_900488 XM_900492 XM_900499 XM_900504 XM_905468 XM_919327 XM_919336 XM_919343 XM_919346 XM_919353 XM_919361 XM_919381 XM_919390 XM_919400
LOC547323	80.5	76.9	77.7	1.0104	74.2	78.9	1.06334	82.4	70.1	-1.17546	Mus musculus similar to RIKEN cDNA A430107P09 gene (LOC547323), mRNA.
2610020C11Rik	99.1	79.8	69.6	-1.14655	87.4	89.7	1.02632	98.5	83.8	-1.17542
Gpr82	70.5	79.5	78.2	-1.01662	69.6	72.1	1.03592	76.4	65	-1.17538	Mus musculus G protein-coupled receptor 82 (Gpr82), mRNA.
Ptk7	71.1	77	76.5	-1.00654	74.1	74.6	1.00675	77.1	65.6	-1.1753	Mus musculus PTK7 protein tyrosine kinase 7 (Ptk7), mRNA.
Sys1	179.1	159.5	171.4	1.07461	187.2	167	-1.12096	209.2	178	-1.17528	Mus musculus SYS1 Golgi-localized integral membrane protein homolog (S. cerevisiae) (Sys1), mRNA.
Peg3	64.2	57	63.8	1.1193	62.3	66.5	1.06742	63.7	54.2	-1.17528	Mus musculus paternally expressed 3 (Peg3), mRNA.
OTTMUSG00000010328	68.5	72	64.3	-1.11975	65	66	1.01538	73.1	62.2	-1.17524	Mus musculus predicted gene, OTTMUSG00000010328 (OTTMUSG00000010328), mRNA.
Atxn7l2	145.5	165	165.2	1.00121	148.7	136.2	-1.09178	162.3	138.1	-1.17524	Mus musculus ataxin 7-like 2 (Atxn7l2), mRNA.
Pkd2l2	63.1	64.4	65	1.00932	66.4	64	-1.0375	73.8	62.8	-1.17516	Mus musculus polycystic kidney disease 2-like 2 (Pkd2l2), mRNA.
Ubtd2	117	113.5	113.6	1.00088	137.1	146.4	1.06783	212.8	181.1	-1.17504	Mus musculus ubiquitin domain containing 2 (Ubtd2), mRNA.
Ctsk	409.4	356.5	352.9	-1.0102	427.3	459.4	1.07512	494.2	420.6	-1.17499	Mus musculus cathepsin K (Ctsk), mRNA.
Il17rc	273.9	264.3	286	1.0821	263.3	276.5	1.05013	297.8	253.5	-1.17475	Mus musculus interleukin 17 receptor C (Il17rc), mRNA.
Cldnd1	249.5	268.4	282.5	1.05253	372.7	366.2	-1.01775	422.9	360	-1.17472	Mus musculus claudin domain containing 1 (Cldnd1), mRNA.
Scnn1a	66.5	70.3	63.5	-1.10709	65	62.3	-1.04334	71.3	60.7	-1.17463	Mus musculus sodium channel, nonvoltage-gated 1 alpha (Scnn1a), mRNA.
Fcnb	71.9	72	67.6	-1.06509	74.2	70	-1.06	76.7	65.3	-1.17458	Mus musculus ficolin B (Fcnb), mRNA.
Ifitm6	2352.6	2521.5	2101.8	-1.19969	2416.4	2392.4	-1.01003	2860.2	2435.2	-1.17452	Mus musculus interferon induced transmembrane protein 6 (Ifitm6), mRNA.
Obfc2a	139.3	146.6	142.3	-1.03022	208	260.2	1.25096	198.6	169.1	-1.17445	Mus musculus oligonucleotide/oligosaccharide-binding fold containing 2A (Obfc2a), mRNA.
Prm1	68.2	69.1	70.9	1.02605	82.4	75.7	-1.08851	86.2	73.4	-1.17439	Mus musculus protamine 1 (Prm1), mRNA.
Pcdhga9	70	72.1	68.8	-1.04797	73.3	63.6	-1.15252	73.5	62.6	-1.17412	Mus musculus protocadherin gamma subfamily A, 9 (Pcdhga9), mRNA.
Snx13	217.3	255.2	248.2	-1.0282	229.7	212	-1.08349	255	217.2	-1.17403	Mus musculus sorting nexin 13 (Snx13), mRNA.
Dlk2	83.3	75.2	80.7	1.07314	79.1	86.5	1.09355	87.7	74.7	-1.17403	Mus musculus delta-like 2 homolog (Drosophila) (Dlk2), mRNA.
Inppl1	1627.2	1601	1572.9	-1.01787	1382.5	1269.4	-1.0891	1780.8	1516.9	-1.17397	Mus musculus inositol polyphosphate phosphatase-like 1 (Inppl1), mRNA.
EG432985	63.5	65.8	62.4	-1.05449	66.4	64.2	-1.03427	70.2	59.8	-1.17391	Mus musculus predicted gene, EG432985 (EG432985), non-coding RNA.
Olfr1281	74.7	69.3	72.2	1.04185	69.9	70.7	1.01144	89.1	75.9	-1.17391	Mus musculus olfactory receptor 1281 (Olfr1281), mRNA.
Kcnma1	72.1	59.6	72.2	1.21141	76.3	71.4	-1.06863	95.2	81.1	-1.17386
Olfr204	68.8	64	66.8	1.04375	66.7	74.5	1.11694	77	65.6	-1.17378	Mus musculus olfactory receptor 204 (Olfr204), mRNA.
3830408P04Rik	691.7	715.5	626.4	-1.14224	628.3	654	1.0409	747.3	636.7	-1.17371
Tshb	63.3	69.2	67.7	-1.02216	60.2	70.7	1.17442	66.9	57	-1.17368	Mus musculus thyroid stimulating hormone, beta subunit (Tshb), mRNA.
AA409316	128.8	117.1	131.6	1.12383	124.5	109.4	-1.13803	120.3	102.5	-1.17366	Mus musculus expressed sequence AA409316 (AA409316), mRNA.
Cacng4	68.1	76	65.7	-1.15677	67.2	65	-1.03385	73.7	62.8	-1.17357
Derl3	64.4	69.2	64.7	-1.06955	68.5	66.8	-1.02545	71	60.5	-1.17355	Mus musculus Der1-like domain family, member 3 (Derl3), mRNA.
AI413782	124.8	138.4	117	-1.18291	140.5	128.2	-1.09594	148.8	126.8	-1.1735	Mus musculus expressed sequence AI413782 (AI413782), mRNA.
Smg6	124	130.7	115.1	-1.13553	91.5	107.2	1.17158	108.9	92.8	-1.17349	Mus musculus Smg-6 homolog, nonsense mediated mRNA decay factor (C. elegans) (Smg6), mRNA.
Cdkn2d	350	316.1	313.2	-1.00926	209.8	175.5	-1.19544	203.6	173.5	-1.17349	Mus musculus cyclin-dependent kinase inhibitor 2D (p19, inhibits CDK4) (Cdkn2d), mRNA.
Rnpepl1	2613.4	2381	2521.5	1.05901	1958.2	1894.2	-1.03379	2131.2	1816.2	-1.17344	Mus musculus arginyl aminopeptidase (aminopeptidase B)-like 1 (Rnpepl1), mRNA.
4832428D23Rik	80.7	83.4	81.1	-1.02836	86.9	84.8	-1.02476	83.3	71	-1.17324	Mus musculus RIKEN cDNA 4832428D23 gene (4832428D23Rik), mRNA.
Klra15	65.2	67.8	60.2	-1.12625	61.3	70.6	1.15171	69.1	58.9	-1.17317	Mus musculus killer cell lectin-like receptor, subfamily A, member 15 (Klra15), mRNA.
Stx1a	90.6	101.9	89.2	-1.14238	83.7	74.9	-1.11749	84.7	72.2	-1.17313	Mus musculus syntaxin 1A (brain) (Stx1a), mRNA.
Zfp597	158.3	130.8	132.9	1.01606	150.7	163.8	1.08693	209.4	178.5	-1.17311	Mus musculus zinc finger protein 597 (Zfp597), mRNA.
Slfn3	87.3	93.1	96.8	1.03974	95	93.2	-1.01931	118.6	101.1	-1.1731	Mus musculus schlafen 3 (Slfn3), mRNA.
2310058J06Rik	70.1	74.8	63.3	-1.18167	64.8	72.3	1.11574	80.7	68.8	-1.17297
Olfr347	68.9	68.4	67.6	-1.01183	67.3	68.3	1.01486	74.6	63.6	-1.17296	Mus musculus olfactory receptor 347 (Olfr347), mRNA.
Ccdc96	73.4	71.4	74.1	1.03782	75.2	69.5	-1.08201	78.7	67.1	-1.17288	Mus musculus coiled-coil domain containing 96 (Ccdc96), mRNA.
9930104L06Rik	90	88.9	97.6	1.09786	85.5	78	-1.09615	91.6	78.1	-1.17286	Mus musculus RIKEN cDNA 9930104L06 gene (9930104L06Rik), mRNA.
Grid2ip	67.5	68.3	63.4	-1.07729	72.6	72.9	1.00413	76	64.8	-1.17284	Mus musculus glutamate receptor, ionotropic, delta 2 (Grid2) interacting protein 1 (Grid2ip), mRNA.
Arhgef10l	79.6	80.5	82.7	1.02733	75.6	79.8	1.05556	86.2	73.5	-1.17279	Mus musculus Rho guanine nucleotide exchange factor (GEF) 10-like (Arhgef10l), mRNA.
Galnt4	71.3	67.4	65.8	-1.02432	67.6	70.2	1.03846	70.6	60.2	-1.17276	Mus musculus UDP-N-acetyl-alpha-D-galactosamine:polypeptide N-acetylgalactosaminyltransferase 4 (Galnt4), mRNA.
EG432825	76.8	76.8	74.2	-1.03504	80.6	88.3	1.09553	86.9	74.1	-1.17274	Mus musculus predicted gene, EG432825 (EG432825), mRNA.
Tas1r1	66.5	65.6	70.5	1.0747	66.8	55.1	-1.21234	67.9	57.9	-1.17271	Mus musculus taste receptor, type 1, member 1 (Tas1r1), mRNA.
Arl4a	89.3	90.3	90.2	-1.00111	93.7	95.5	1.01921	120.2	102.5	-1.17268	Mus musculus ADP-ribosylation factor-like 4A (Arl4a), transcript variant 1, mRNA.
Fem1c	343.5	449.2	415.7	-1.08059	401.5	544.5	1.35616	447	381.2	-1.17261	Mus musculus fem-1 homolog c (C.elegans) (Fem1c), mRNA.
Ccr1	65.1	62.7	65.1	1.03828	60.9	66.9	1.09852	66.6	56.8	-1.17254	Mus musculus chemokine (C-C motif) receptor 1 (Ccr1), mRNA.
Plekha5	92.8	89.3	84	-1.0631	81.2	91.8	1.13054	107.4	91.6	-1.17249	Mus musculus pleckstrin homology domain containing, family A member 5 (Plekha5), mRNA.
Cd300lf	76	80.4	69.8	-1.15186	81.1	74.4	-1.09005	93.2	79.5	-1.17233	Mus musculus CD300 antigen like family member F (Cd300lf), mRNA.
Il17a	76.9	72.9	72.4	-1.00691	77.8	82.8	1.06427	83	70.8	-1.17232	Mus musculus interleukin 17A (Il17a), mRNA.
Tg	63.5	65.3	63.2	-1.03323	66.7	56.9	-1.17223	65.4	55.8	-1.17204	Mus musculus thyroglobulin (Tg), mRNA.
Adam25	63.2	65	63.7	-1.02041	65.7	73.5	1.11872	70.2	59.9	-1.17195	Mus musculus a disintegrin and metallopeptidase domain 25 (testase 2) (Adam25), mRNA.
Osbp2	64.2	60.2	71	1.1794	64	64.8	1.0125	74.3	63.4	-1.17192	Mus musculus oxysterol binding protein 2 (Osbp2), mRNA.
Akap10	254.3	270.6	245	-1.10449	154.8	154.1	-1.00454	213.4	182.1	-1.17188	Mus musculus A kinase (PRKA) anchor protein 10 (Akap10), nuclear gene encoding mitochondrial protein, mRNA.
Foxo4	64	66.4	72.3	1.08886	58.3	58.2	-1.00172	67.5	57.6	-1.17188	Mus musculus forkhead box O4 (Foxo4), mRNA.
Atp10a	66.8	63.7	67.5	1.05965	62.6	68.9	1.10064	75	64	-1.17188	Mus musculus ATPase, class V, type 10A (Atp10a), mRNA.
Odc1	8748.8	14104.6	13199.8	-1.06855	24231.5	26963.1	1.11273	30226.8	25798	-1.17167	Mus musculus ornithine decarboxylase, structural 1 (Odc1), mRNA.
Atp6v1b1	98	99.4	108.7	1.09356	104.8	90.6	-1.15673	101.2	86.4	-1.1713	Mus musculus ATPase, H+ transporting, lysosomal V1 subunit B1 (Atp6v1b1), mRNA.
A630098A13Rik	72.4	71	74.9	1.05493	67.9	78	1.14875	82.8	70.7	-1.17115
Khdc1c	71	66.2	70.3	1.06193	78.6	73.8	-1.06504	78.7	67.2	-1.17113	Mus musculus KH domain containing 1C (Khdc1c), mRNA.
Tas2r102	65.9	61.7	71	1.15073	58.9	65.5	1.11205	65.7	56.1	-1.17112	Mus musculus taste receptor, type 2, member 102 (Tas2r102), mRNA.
Aqr	298.5	314.4	308	-1.02078	280.5	302	1.07665	286.8	244.9	-1.17109	Mus musculus aquarius (Aqr), mRNA.
Ttll6	67.1	55	60.3	1.09636	60.7	65.2	1.07414	76	64.9	-1.17103	Mus musculus tubulin tyrosine ligase-like family, member 6 (Ttll6), mRNA.
Pnrc2	828.4	681.7	640	-1.06516	496.3	520.6	1.04896	674.8	576.3	-1.17092	Mus musculus proline-rich nuclear receptor coactivator 2 (Pnrc2), mRNA.
Xrn2	143.5	144.6	137.6	-1.05087	153.4	165.7	1.08018	170.6	145.7	-1.1709	Mus musculus 5'-3' exoribonuclease 2 (Xrn2), mRNA.
2700007P21Rik	314.5	228.7	242.9	1.06209	150.4	151.2	1.00532	161.7	138.1	-1.17089	Mus musculus RIKEN cDNA 2700007P21 gene (2700007P21Rik), transcript variant 2, mRNA.
Rab40b	85.3	81.9	83.5	1.01954	82.4	83.7	1.01578	92.5	79	-1.17089	Mus musculus Rab40b, member RAS oncogene family (Rab40b), mRNA.
Pcyox1	654.1	581.7	563.9	-1.03157	277.9	285.7	1.02807	296.8	253.5	-1.17081
BC010462	70.2	70.2	76.6	1.09117	65.3	65.6	1.00459	80.2	68.5	-1.1708
V1rc27	60.5	55.7	54.7	-1.01828	61	54.4	-1.12132	63.1	53.9	-1.17069	Mus musculus vomeronasal 1 receptor, C27 (V1rc27), mRNA.
Olfr923	72.5	68.6	67.8	-1.0118	63.1	67.7	1.0729	68.6	58.6	-1.17065	Mus musculus olfactory receptor 923 (Olfr923), mRNA.
Olfr884	67.6	62	72	1.16129	71.7	64.5	-1.11163	74.1	63.3	-1.17062	Mus musculus olfactory receptor 884 (Olfr884), mRNA.
Zfp288	75.2	72.3	80.7	1.11618	76	73.8	-1.02981	89.2	76.2	-1.1706
Ccl27	68.1	68.8	70	1.01744	67	71.8	1.07164	79.6	68	-1.17059	Mus musculus chemokine (C-C motif) ligand 27 (Ccl27), transcript variant 2, mRNA.
Gramd4	69.5	68.9	67.9	-1.01473	69.9	66.5	-1.05113	75.5	64.5	-1.17054	Mus musculus GRAM domain containing 4 (Gramd4), mRNA.
Sprr2e	60.9	66.3	54.3	-1.22099	69.1	81.6	1.1809	75.5	64.5	-1.17054	Mus musculus small proline-rich protein 2E (Sprr2e), mRNA.
Pias3	154.3	158.4	149.7	-1.05812	134.5	125.3	-1.07342	146.2	124.9	-1.17054	Mus musculus protein inhibitor of activated STAT 3 (Pias3), transcript variant 1, mRNA.
Tmem98	195.9	202.9	195.5	-1.03785	213.1	216.5	1.01595	227.9	194.7	-1.17052	Mus musculus transmembrane protein 98 (Tmem98), mRNA.
Prmt6	583	517.9	484.6	-1.06872	888.2	822.7	-1.07962	1121.8	958.4	-1.17049	Mus musculus protein arginine N-methyltransferase 6 (Prmt6), mRNA.
Rnf6	960	910	981.4	1.07846	877.4	1026.1	1.16948	1093.8	934.5	-1.17047	Mus musculus ring finger protein (C3H2C3 type) 6 (Rnf6), mRNA.
Zmynd15	78.2	75.3	72.6	-1.03719	80.5	81.3	1.00994	94.1	80.4	-1.1704	Mus musculus zinc finger, MYND-type containing 15 (Zmynd15), mRNA.
Ptp4a2	1711.8	1541.3	1659.8	1.07688	1629.2	1736.7	1.06598	1758.4	1502.6	-1.17024	Mus musculus protein tyrosine phosphatase 4a2 (Ptp4a2), mRNA.
6330505N24Rik	77.7	85.4	74	-1.15405	81.1	67.2	-1.20685	79.1	67.6	-1.17012	Mus musculus RIKEN cDNA 6330505N24 gene (6330505N24Rik), mRNA.
Hoxc10	76	83.1	81.5	-1.01963	87.1	85	-1.02471	86	73.5	-1.17007	Mus musculus homeo box C10 (Hoxc10), mRNA.
Canx	61.8	69	62.4	-1.10577	63.3	73.2	1.1564	69.5	59.4	-1.17003	Mus musculus calnexin (Canx), mRNA.
Cdk7	67.6	62.5	63.4	1.0144	65.3	68.8	1.0536	75.7	64.7	-1.17002	Mus musculus cyclin-dependent kinase 7 (homolog of Xenopus MO15 cdk-activating kinase) (Cdk7), mRNA.
Spaca4	79.1	65.3	72.4	1.10873	73.8	83.8	1.1355	81.9	70	-1.17	Mus musculus sperm acrosome associated 4 (Spaca4), mRNA.
Fbxw19	62.4	61	72.3	1.18525	68.4	60	-1.14	72.3	61.8	-1.1699	Mus musculus F-box and WD-40 domain protein 19 (Fbxw19), mRNA.
Pcdh17	82.7	81.9	83.5	1.01954	89.9	78.4	-1.14668	84.7	72.4	-1.16989	Mus musculus protocadherin 17 (Pcdh17), mRNA.
Ccdc3	85	77.4	82.5	1.06589	92.3	81.1	-1.1381	97.1	83	-1.16988
Zscan20	84.2	79.9	82.2	1.02879	74.2	77.6	1.04582	92.3	78.9	-1.16984	Mus musculus zinc finger and SCAN domains 20 (Zscan20), mRNA.
Ttc30b	64.2	70.8	71.9	1.01554	66.9	68.2	1.01943	75.8	64.8	-1.16975	Mus musculus tetratricopeptide repeat domain 30B (Ttc30b), mRNA. XM_911984 XM_986297
Taar7f	63	69.5	73.5	1.05755	71.2	78.5	1.10253	70.3	60.1	-1.16972	Mus musculus trace amine-associated receptor 7F (Taar7f), mRNA.
Cgnl1	72.1	77.3	69.8	-1.10745	81.1	74.6	-1.08713	77.9	66.6	-1.16967	Mus musculus cingulin-like 1 (Cgnl1), mRNA.
Necap2	713.4	673.3	680.2	1.01025	635.1	682.1	1.074	677	578.8	-1.16966	Mus musculus NECAP endocytosis associated 2 (Necap2), mRNA.
Cyfip1	231.9	248.4	247.6	-1.00323	272.2	287	1.05437	376.5	321.9	-1.16962	Mus musculus cytoplasmic FMR1 interacting protein 1 (Cyfip1), mRNA.
Pla2g3	67	67.9	59.1	-1.1489	64.6	68.4	1.05882	73.1	62.5	-1.1696	Mus musculus phospholipase A2, group III (Pla2g3), mRNA.
EG232801	70.9	70.6	70.5	-1.00142	71.9	76.3	1.0612	70.4	60.2	-1.16944	Mus musculus predicted gene, EG232801 (EG232801), mRNA.
Txndc8	61.3	53.4	56.1	1.05056	61.6	59.1	-1.0423	57.3	49	-1.16939	Mus musculus thioredoxin domain containing 8 (Txndc8), mRNA.
Gcc2	196	192.4	179.4	-1.07246	164	180.1	1.09817	180.9	154.7	-1.16936	Mus musculus GRIP and coiled-coil domain containing 2 (Gcc2), mRNA.
Trp53bp2	92.1	110.3	106.5	-1.03568	94.3	86.7	-1.08766	87.7	75	-1.16933	Mus musculus transformation related protein 53 binding protein 2 (Trp53bp2), mRNA.
Mmp10	74.7	75.6	75.7	1.00132	89.5	73.2	-1.22268	88.4	75.6	-1.16931	Mus musculus matrix metallopeptidase 10 (Mmp10), mRNA.
Ptprm	67.8	70.6	67.3	-1.04903	66.7	63.8	-1.04545	69.1	59.1	-1.1692	Mus musculus protein tyrosine phosphatase, receptor type, M (Ptprm), mRNA.
Gipc2	78.9	76.5	76.7	1.00261	79.5	85.5	1.07547	88.5	75.7	-1.16909	Mus musculus GIPC PDZ domain containing family, member 2 (Gipc2), mRNA.
Pgk2	67.9	69.3	63.1	-1.09826	67.8	68.4	1.00885	74	63.3	-1.16904	Mus musculus phosphoglycerate kinase 2 (Pgk2), mRNA.
Olfr691	70.2	68.3	65.6	-1.04116	68.6	75.3	1.09767	77.5	66.3	-1.16893	Mus musculus olfactory receptor 691 (Olfr691), mRNA.
Ccl24	69	69.2	74.5	1.07659	77.4	88	1.13695	78.9	67.5	-1.16889	Mus musculus chemokine (C-C motif) ligand 24 (Ccl24), mRNA.
Cog4	146	157.6	156.9	-1.00446	152	163.7	1.07697	171	146.3	-1.16883	Mus musculus component of oligomeric golgi complex 4 (Cog4), mRNA.
H19	77.2	78.1	82.2	1.0525	71.9	90.2	1.25452	85.2	72.9	-1.16872	Mus musculus H19 fetal liver mRNA (H19), non-coding RNA.
Hgs	242.8	230	227.8	-1.00966	233.1	261.5	1.12184	288.2	246.6	-1.16869	Mus musculus HGF-regulated tyrosine kinase substrate (Hgs), mRNA.
Rab12	298.1	305.8	290.5	-1.05267	419.9	479.8	1.14265	598	511.7	-1.16865	Mus musculus RAB12, member RAS oncogene family (Rab12), mRNA.
Cdk6	136.2	128.7	135.8	1.05517	140.1	140.3	1.00143	211.5	181	-1.16851	Mus musculus cyclin-dependent kinase 6 (Cdk6), mRNA.
Paf1	175.3	186.6	186.9	1.00161	208.5	205.4	-1.01509	247.6	211.9	-1.16848	Mus musculus Paf1, RNA polymerase II associated factor, homolog (S. cerevisiae) (Paf1), mRNA.
Ambra1	179.3	184.2	174.5	-1.05559	157.5	165.7	1.05206	203.3	174	-1.16839	Mus musculus autophagy/beclin 1 regulator 1 (Ambra1), transcript variant 1, mRNA.
Mdn1	328.3	339	328.6	-1.03165	377.6	399.1	1.05694	429.5	367.6	-1.16839	Mus musculus midasin homolog (yeast) (Mdn1), mRNA.
Tbl1x	490	528.2	506.3	-1.04325	496.7	449.9	-1.10402	542.1	464	-1.16832	Mus musculus transducin (beta)-like 1 X-linked (Tbl1x), mRNA.
Mtmr3	169.6	179.2	182.6	1.01897	145.2	116.1	-1.25065	156.3	133.8	-1.16816	Mus musculus myotubularin related protein 3 (Mtmr3), mRNA.
Uba6	80.2	78.1	79.2	1.01408	78.4	75.5	-1.03841	94.5	80.9	-1.16811	Mus musculus ubiquitin-like modifier activating enzyme 6 (Uba6), mRNA.
Scara5	64.7	71.3	71.2	-1.0014	67.4	62.5	-1.0784	68.1	58.3	-1.1681	Mus musculus scavenger receptor class A, member 5 (putative) (Scara5), mRNA.
Dynll1	7048.2	6986.2	6916.5	-1.01008	6504.5	6852.1	1.05344	7084.6	6065.6	-1.168	Mus musculus dynein light chain LC8-type 1 (Dynll1), mRNA.
Ethe1	299.5	292.6	309.9	1.05913	283.9	332.2	1.17013	293.4	251.2	-1.16799	Mus musculus ethylmalonic encephalopathy 1 (Ethe1), mRNA.
1700123O20Rik	698.7	671.4	618.9	-1.08483	583.7	571.2	-1.02188	604.9	517.9	-1.16799	Mus musculus RIKEN cDNA 1700123O20 gene (1700123O20Rik), mRNA.
Cabp2	72.4	69	74.2	1.07536	67	70.7	1.05522	74.4	63.7	-1.16797	Mus musculus calcium binding protein 2 (Cabp2), mRNA.
Ern1	70.3	72.3	63.5	-1.13858	73.3	68.2	-1.07478	77.2	66.1	-1.16793	Mus musculus endoplasmic reticulum (ER) to nucleus signalling 1 (Ern1), mRNA.
BC048671	67.8	63.2	64.2	1.01582	58.6	71	1.2116	77.9	66.7	-1.16792	Mus musculus cDNA sequence BC048671 (BC048671), mRNA.
Lrrc3b	63.6	56.2	57.1	1.01601	54.8	64.6	1.17883	62.6	53.6	-1.16791	Mus musculus leucine rich repeat containing 3B (Lrrc3b), mRNA.
Ap1s3	120	113.3	104	-1.08942	127	140	1.10236	173.2	148.3	-1.1679	Mus musculus adaptor-related protein complex AP-1, sigma 3 (Ap1s3), mRNA.
LOC235206	73	71.5	65.8	-1.08663	80.8	70.9	-1.13963	79.3	67.9	-1.16789
Smug1	202	174.4	172.2	-1.01278	181.3	197.6	1.08991	247	211.5	-1.16785	Mus musculus single-strand selective monofunctional uracil DNA glycosylase (Smug1), mRNA.
Islr2	71.7	84.2	71.6	-1.17598	72.3	83.3	1.15214	84.2	72.1	-1.16782	Mus musculus immunoglobulin superfamily containing leucine-rich repeat 2 (Islr2), mRNA.
Entpd1	62.5	60	60.3	1.005	63.5	71.4	1.12441	75.9	65	-1.16769	Mus musculus ectonucleoside triphosphate diphosphohydrolase 1 (Entpd1), mRNA.
Atp6v1b2	6279.3	6306.5	6139.1	-1.02727	4855.6	5515.4	1.13588	5180	4436.7	-1.16753	Mus musculus ATPase, H+ transporting, lysosomal V1 subunit B2 (Atp6v1b2), mRNA.
Gch1	4278.5	4057.1	4281.4	1.05529	5177.2	5979.8	1.15503	6691.1	5731.3	-1.16747
Olfr1434	65.1	64.4	58.7	-1.0971	64.4	66	1.02484	74.6	63.9	-1.16745	Mus musculus olfactory receptor 1434 (Olfr1434), mRNA.
4930417M19Rik	65.5	75.4	69	-1.09275	66.5	71.5	1.07519	76.7	65.7	-1.16743	Mus musculus RIKEN cDNA 4930417M19 gene (4930417M19Rik), mRNA.
Lime1	80.6	70.5	64.4	-1.09472	69	69.6	1.0087	78.8	67.5	-1.16741	Mus musculus Lck interacting transmembrane adaptor 1 (Lime1), mRNA.
Spats1	82.9	83.9	82.6	-1.01574	88	76.8	-1.14583	83.7	71.7	-1.16736	Mus musculus spermatogenesis associated, serine-rich 1 (Spats1), mRNA.
AI851790	74.6	83.6	77.6	-1.07732	82.1	85.8	1.04507	98.4	84.3	-1.16726	Mus musculus expressed sequence AI851790 (AI851790), mRNA.
Maz	91.3	95.7	93.3	-1.02572	87.9	93.1	1.05916	106.8	91.5	-1.16721	Mus musculus MYC-associated zinc finger protein (purine-binding transcription factor) (Maz), mRNA.
Olfr474	61.9	59.2	67.7	1.14358	62.4	70	1.12179	71.9	61.6	-1.16721	Mus musculus olfactory receptor 474 (Olfr474), mRNA.
Jph3	66.7	65	70.9	1.09077	69.1	62.3	-1.10915	72.6	62.2	-1.1672	Mus musculus junctophilin 3 (Jph3), mRNA.
Myo9b	707.5	704.7	733.5	1.04087	703.3	761.6	1.08289	796.7	682.6	-1.16715	Mus musculus myosin IXb (Myo9b), mRNA.
Map2k2	1457.2	1374.6	1435.9	1.04459	1667.6	1480.8	-1.12615	1541.4	1320.8	-1.16702	Mus musculus mitogen activated protein kinase kinase 2 (Map2k2), mRNA.
Csnrp3	68.5	62	61.8	-1.00324	62.1	70.2	1.13043	72	61.7	-1.16694	Mus musculus cysteine-serine-rich nuclear protein 3 (Csnrp3), mRNA.
Prox1	68.2	67.5	69.8	1.03407	69.6	68.6	-1.01458	74.1	63.5	-1.16693	Mus musculus prospero-related homeobox 1 (Prox1), mRNA.
Hepacam	69.3	65.6	69.3	1.0564	69.2	74.4	1.07514	83.9	71.9	-1.1669	Mus musculus hepatocyte cell adhesion molecule (Hepacam), mRNA.
Olfr1023	80.8	71.2	87.4	1.22753	75.5	81.4	1.07815	84.6	72.5	-1.1669	Mus musculus olfactory receptor 1023 (Olfr1023), mRNA.
Syk	77.7	77.7	74.2	-1.04717	67.8	69.4	1.0236	74.9	64.2	-1.16667	Mus musculus spleen tyrosine kinase (Syk), mRNA.
Krt27	75	72.6	82.1	1.13085	75.6	87.4	1.15608	88.2	75.6	-1.16667	Mus musculus keratin 27 (Krt27), mRNA.
Mepe	84.4	100.7	85.5	-1.17778	95.1	90	-1.05667	88.3	75.7	-1.16645	Mus musculus matrix extracellular phosphoglycoprotein with ASARM motif (bone) (Mepe), mRNA.
Cnfn	75.3	73.7	85.6	1.16147	90.6	90.2	-1.00443	85.5	73.3	-1.16644	Mus musculus cornifelin (Cnfn), transcript variant 2, mRNA.
Cox4i2	70.7	68.7	68.7	1	63.7	72.1	1.13187	75	64.3	-1.16641	Mus musculus cytochrome c oxidase subunit IV isoform 2 (Cox4i2), nuclear gene encoding mitochondrial protein, mRNA.
Olfr541	62.8	69.8	68.2	-1.02346	64.7	74.2	1.14683	68	58.3	-1.16638	Mus musculus olfactory receptor 541 (Olfr541), mRNA.
Usp30	107.8	95.7	105.8	1.10554	75.2	84.5	1.12367	96.8	83	-1.16627	Mus musculus ubiquitin specific peptidase 30 (Usp30), mRNA.
Appbp2	1867.2	1807.3	1838.6	1.01732	2179.9	2159.7	-1.00935	2615.3	2242.5	-1.16624
Slc26a6	138	124.2	113.8	-1.09139	111.5	140.1	1.2565	128.4	110.1	-1.16621	Mus musculus solute carrier family 26, member 6 (Slc26a6), mRNA.
Ppara	64.1	68.2	71.3	1.04545	69.4	63.4	-1.09464	70.2	60.2	-1.16611	Mus musculus peroxisome proliferator activated receptor alpha (Ppara), mRNA.
Ifnar1	64.7	56.5	61.2	1.08319	62.7	56.1	-1.11765	66.7	57.2	-1.16608	Mus musculus interferon (alpha and beta) receptor 1 (Ifnar1), mRNA.
Ube2i	147.3	145.5	154.9	1.0646	160.6	141.6	-1.13418	165.7	142.1	-1.16608	Mus musculus ubiquitin-conjugating enzyme E2I (Ube2i), mRNA.
Jmjd4	79	83.8	83	-1.00964	86.4	81.2	-1.06404	94.9	81.4	-1.16585	Mus musculus jumonji domain containing 4 (Jmjd4), mRNA.
Krt15	75.7	79.5	75.8	-1.04881	74.8	80.7	1.07888	83	71.2	-1.16573	Mus musculus keratin 15 (Krt15), mRNA.
Stoml1	91.9	87.3	89.6	1.02635	83.4	85.8	1.02878	103.4	88.7	-1.16573	Mus musculus stomatin-like 1 (Stoml1), mRNA.
4930486L24Rik	68.2	73.7	69.5	-1.06043	76.1	75.1	-1.01332	100.6	86.3	-1.1657	Mus musculus RIKEN cDNA 4930486L24 gene (4930486L24Rik), mRNA.
Tmprss9	70.3	68.5	68.9	1.00584	68.4	72.9	1.06579	80.2	68.8	-1.1657	Mus musculus transmembrane protease, serine 9 (Tmprss9), mRNA.
Smad6	79.5	79.7	78.6	-1.01399	81.5	83	1.0184	90.8	77.9	-1.1656	Mus musculus MAD homolog 6 (Drosophila) (Smad6), mRNA.
Nox1	68.3	69.8	65.4	-1.06728	67.3	67.1	-1.00298	84.5	72.5	-1.16552	Mus musculus NADPH oxidase 1 (Nox1), mRNA.
Sar1a	548.1	557.5	556.1	-1.00252	587.2	633.3	1.07851	638.7	548	-1.16551	Mus musculus SAR1 gene homolog A (S. cerevisiae) (Sar1a), mRNA.
Tfip11	313.4	319.9	349.1	1.09128	398.7	397.5	-1.00302	395.9	339.7	-1.16544	Mus musculus tuftelin interacting protein 11 (Tfip11), mRNA.
Adam6	87.9	75.8	78.1	1.03034	77.5	83.9	1.08258	87.4	75	-1.16533	Mus musculus a disintegrin and metallopeptidase domain 6 (Adam6), mRNA.
Olfr994	65.5	77.4	71.2	-1.08708	64.2	64.6	1.00623	72.6	62.3	-1.16533	Mus musculus olfactory receptor 994 (Olfr994), mRNA.
Reg4	72.5	67.9	71.5	1.05302	72.6	70.8	-1.02542	81.1	69.6	-1.16523	Mus musculus regenerating islet-derived family, member 4 (Reg4), mRNA.
Golga7	325	319.9	316.2	-1.0117	332.7	301.2	-1.10458	415.4	356.5	-1.16522	Mus musculus golgi autoantigen, golgin subfamily a, 7 (Golga7), transcript variant 2, mRNA.
Pcyt1a	372.9	407.4	382.5	-1.0651	368.4	451.8	1.22638	374.5	321.4	-1.16521	Mus musculus phosphate cytidylyltransferase 1, choline, alpha isoform (Pcyt1a), mRNA.
Zfp329	76.3	74.2	71	-1.04507	71	71.2	1.00282	78.3	67.2	-1.16518	Mus musculus zinc finger protein 329 (Zfp329), mRNA.
Chrne	80	76.9	85.1	1.10663	74.3	81.4	1.09556	81.9	70.3	-1.16501	Mus musculus cholinergic receptor, nicotinic, epsilon polypeptide (Chrne), mRNA.
Cd300lb	431.7	315.4	330.6	1.04819	454.1	520.8	1.14688	564.2	484.3	-1.16498	Mus musculus CD300 antigen like family member B (Cd300lb), mRNA.
Klra20	73.1	68.8	78.7	1.1439	73.9	76.7	1.03789	79.8	68.5	-1.16496	Mus musculus killer cell lectin-like receptor subfamily A, member 20 (Klra20), mRNA.
Eda2r	94.8	95.9	110.2	1.14911	109	84.7	-1.28689	107.4	92.2	-1.16486	Mus musculus ectodysplasin A2 isoform receptor (Eda2r), mRNA.
Olfr1441	65	67.9	74.3	1.09426	67.5	66.3	-1.0181	74.9	64.3	-1.16485	Mus musculus olfactory receptor 1441 (Olfr1441), mRNA.
Spsb2	213.8	203.9	214.2	1.05051	159.2	148.9	-1.06917	168.9	145	-1.16483	Mus musculus splA/ryanodine receptor domain and SOCS box containing 2 (Spsb2), mRNA.
BC004004	103.7	111.8	96.4	-1.15975	91.2	105	1.15132	94	80.7	-1.16481	Mus musculus cDNA sequence BC004004 (BC004004), mRNA.
Hnrnph1	1273.8	1228.6	1198.6	-1.02503	1191.6	1382.2	1.15995	1287.5	1105.5	-1.16463	Mus musculus heterogeneous nuclear ribonucleoprotein H1 (Hnrnph1), mRNA.
Olfr920	65.8	63.8	76.1	1.19279	63.5	60.8	-1.04441	72.9	62.6	-1.16454	Mus musculus olfactory receptor 920 (Olfr920), mRNA.
Cyp4a14	65.9	65.1	68.6	1.05376	67.2	61.4	-1.09446	70.1	60.2	-1.16445	Mus musculus cytochrome P450, family 4, subfamily a, polypeptide 14 (Cyp4a14), mRNA.
Ddx56	76	68.9	65.4	-1.05352	67.5	67	-1.00746	77.2	66.3	-1.1644	Mus musculus DEAD (Asp-Glu-Ala-Asp) box polypeptide 56 (Ddx56), mRNA.
1700123D08Rik	77.3	66.3	77.2	1.1644	78.6	78.7	1.00127	85.7	73.6	-1.1644	Mus musculus RIKEN cDNA 1700123D08 gene (1700123D08Rik), mRNA.
Tmem50a	3059.7	3013.7	2917.6	-1.03294	3067.6	3032.3	-1.01164	2790.1	2396.2	-1.16439	Mus musculus transmembrane protein 50A (Tmem50a), mRNA.
2700062C07Rik	177.4	179.4	179.4	1	182.9	168.8	-1.08353	236	202.7	-1.16428	Mus musculus RIKEN cDNA 2700062C07 gene (2700062C07Rik), mRNA.
H2-T23	4263	4181	4222	1.00981	4146.1	4375.8	1.0554	5606.3	4815.8	-1.16415	Mus musculus histocompatibility 2, T region locus 23 (H2-T23), mRNA.
Stard5	290.6	310.4	301.8	-1.0285	225.2	217.5	-1.0354	259.6	223	-1.16413	Mus musculus StAR-related lipid transfer (START) domain containing 5 (Stard5), mRNA.
Pttg1	152.2	151.5	145	-1.04483	143.9	152.2	1.05768	175.2	150.5	-1.16412	Mus musculus pituitary tumor-transforming 1 (Pttg1), mRNA.
Zfp219	150.2	147.5	149.9	1.01627	125.7	121	-1.03884	143.3	123.1	-1.16409	Mus musculus zinc finger protein 219 (Zfp219), mRNA.
LOC100047815	69.1	63.2	70.3	1.11234	78.3	66.3	-1.181	72.4	62.2	-1.16399	PREDICTED: Mus musculus similar to CD79A antigen (immunoglobulin-associated alpha) (LOC100047815), mRNA.
Olfr1095	67.4	61.9	65.6	1.05977	61.3	74.1	1.20881	72.4	62.2	-1.16399	Mus musculus olfactory receptor 1095 (Olfr1095), mRNA.
Slc4a4	87.8	82.2	82.3	1.00122	76.6	76.5	-1.00131	89.5	76.9	-1.16385	Mus musculus solute carrier family 4 (anion exchanger), member 4 (Slc4a4), mRNA.
Gm1123	81.7	89.9	78.2	-1.14962	80	90.7	1.13375	89.5	76.9	-1.16385	Mus musculus gene model 1123, (NCBI) (Gm1123), mRNA.
Cd96	74.3	70.8	67.6	-1.04734	76.4	77.9	1.01963	81.7	70.2	-1.16382	Mus musculus CD96 antigen (Cd96), mRNA.
Ptprv	83.5	80	79.9	-1.00125	84.7	68.7	-1.2329	86	73.9	-1.16373	Mus musculus protein tyrosine phosphatase, receptor type, V (Ptprv), mRNA.
Rnf17	70.2	77.9	77	-1.01169	64.4	68.2	1.05901	78.9	67.8	-1.16372	Mus musculus ring finger protein 17 (Rnf17), mRNA.
Lox	80.6	85.7	84.5	-1.0142	78.7	90.3	1.1474	99.6	85.6	-1.16355	Mus musculus lysyl oxidase (Lox), mRNA.
Zrsr1	80.4	75.6	76.1	1.00661	75.6	84.9	1.12302	84.7	72.8	-1.16346	Mus musculus zinc finger (CCCH type), RNA binding motif and serine/arginine rich 1 (Zrsr1), mRNA.
C330043M08Rik	65.2	69.7	61	-1.14262	56.2	64.3	1.14413	65.5	56.3	-1.16341	Mus musculus RIKEN cDNA C330043M08 gene (C330043M08Rik), mRNA.
Pdcd1	82.8	78.8	91.2	1.15736	78.1	83.5	1.06914	101.1	86.9	-1.16341	Mus musculus programmed cell death 1 (Pdcd1), mRNA.
Dnajc5	942.1	859.8	886.5	1.03105	653.3	768.5	1.17634	781.4	671.7	-1.16332	Mus musculus DnaJ (Hsp40) homolog, subfamily C, member 5 (Dnajc5), mRNA.
Oxct2b	64.9	63.5	68.5	1.07874	63.8	66.3	1.03918	69.1	59.4	-1.1633	Mus musculus 3-oxoacid CoA transferase 2B (Oxct2b), mRNA.
4930573I19Rik	137.5	122.6	127.8	1.04241	103	92	-1.11957	124	106.6	-1.16323	Mus musculus RIKEN cDNA 4930573I19 gene (4930573I19Rik), mRNA.
Slc2a6	6695.5	6537.3	6623.1	1.01312	6547.1	6734.3	1.02859	6793.2	5840.3	-1.16316	Mus musculus solute carrier family 2 (facilitated glucose transporter), member 6 (Slc2a6), mRNA.
Zfp339	65.3	61.9	64.7	1.04523	61	64.3	1.0541	75.6	65	-1.16308
Tshz3	441.9	420	433.1	1.03119	162.9	165.9	1.01842	214.8	184.7	-1.16297	Mus musculus teashirt zinc finger family member 3 (Tshz3), mRNA.
Ifnar2	137.4	136.8	138	1.00877	111.1	111.8	1.0063	157	135	-1.16296	Mus musculus interferon (alpha and beta) receptor 2 (Ifnar2), mRNA.
Plac1	68.9	69.2	80.9	1.16908	72.3	65.8	-1.09878	77.8	66.9	-1.16293	Mus musculus placental specific protein 1 (Plac1), mRNA.
Pop7	234	241.1	276.8	1.14807	285.8	307.1	1.07453	325.5	279.9	-1.16292	Mus musculus processing of precursor 7, ribonuclease P family, (S. cerevisiae) (Pop7), mRNA.
Zfp647	86.6	71.4	73.4	1.02801	82.5	79.9	-1.03254	82.1	70.6	-1.16289	Mus musculus zinc finger protein 647 (Zfp647), mRNA.
Pou6f2	73.4	77.8	71.7	-1.08508	82.1	81.7	-1.0049	79.3	68.2	-1.16276	Mus musculus POU domain, class 6, transcription factor 2 (Pou6f2), mRNA.
Leng8	71.2	75	68.4	-1.09649	66.5	77.2	1.1609	72.9	62.7	-1.16268	Mus musculus leukocyte receptor cluster (LRC) member 8 (Leng8), mRNA.
Schip1	75.1	70.8	70.9	1.00141	70.6	71	1.00567	86.5	74.4	-1.16263	Mus musculus schwannomin interacting protein 1 (Schip1), mRNA.
Bhlhb4	63.7	66.5	65.2	-1.01994	68.3	66.2	-1.03172	66.5	57.2	-1.16259	Mus musculus basic helix-loop-helix domain containing, class B4 (Bhlhb4), mRNA.
1500002O20Rik	93.2	79.6	82.7	1.03894	85.8	83.7	-1.02509	85.1	73.2	-1.16257	Mus musculus RIKEN cDNA 1500002O20 gene (1500002O20Rik), mRNA.
Ly9	501.9	467.2	490.9	1.05073	523.4	534.7	1.02159	588.6	506.3	-1.16255	Mus musculus lymphocyte antigen 9 (Ly9), mRNA.
Psmd7	2196.4	2200.3	2104.4	-1.04557	2149.4	2122.9	-1.01248	2462.1	2118.1	-1.16241	Mus musculus proteasome (prosome, macropain) 26S subunit, non-ATPase, 7 (Psmd7), mRNA.
V1rc21	65.6	74.8	65.9	-1.13505	64.3	66.5	1.03421	72.3	62.2	-1.16238	Mus musculus vomeronasal 1 receptor, C21 (V1rc21), mRNA.
D14Ertd171e	75.5	65.1	72.2	1.10906	69.5	74	1.06475	75.9	65.3	-1.16233
Tmprss11e	65.1	66.6	67.9	1.01952	62	64	1.03226	62.3	53.6	-1.16231	Mus musculus transmembrane protease, serine 11e (Tmprss11e), mRNA.
1700095K08Rik	74.9	75.2	77	1.02394	76	76.9	1.01184	87.4	75.2	-1.16223
Btbd11	75.9	70.2	67	-1.04776	68.3	70.1	1.02635	81.7	70.3	-1.16216	Mus musculus BTB (POZ) domain containing 11 (Btbd11), transcript variant 2, mRNA.
Corin	74.4	68.8	74.3	1.07994	72.3	69.9	-1.03433	76.7	66	-1.16212	Mus musculus corin (Corin), mRNA.
Rsrc2	476.8	508.8	490.5	-1.03731	502.9	504.7	1.00358	744.6	640.8	-1.16199	Mus musculus arginine/serine-rich coiled-coil 2 (Rsrc2), transcript variant 1, mRNA.
Crnkl1	107.3	116.7	97.9	-1.19203	114.6	119.4	1.04188	119.8	103.1	-1.16198	Mus musculus Crn, crooked neck-like 1 (Drosophila) (Crnkl1), mRNA.
Ncbp2	214.8	205.1	202.4	-1.01334	190.9	212.8	1.11472	204.5	176	-1.16193	Mus musculus nuclear cap binding protein subunit 2 (Ncbp2), mRNA.
Irf4	82.9	82.1	75.3	-1.09031	87.2	157.4	1.80505	106.2	91.4	-1.16193	Mus musculus interferon regulatory factor 4 (Irf4), mRNA.
Wdfy2	90.4	98.7	93.7	-1.05336	93.2	85.5	-1.09006	93.3	80.3	-1.16189	Mus musculus WD repeat and FYVE domain containing 2 (Wdfy2), mRNA.
Arhgef2	282.3	262.5	264.1	1.0061	371.7	381.1	1.02529	464.2	399.6	-1.16166	Mus musculus rho/rac guanine nucleotide exchange factor (GEF) 2 (Arhgef2), mRNA.
Jam4	63.7	59.6	55.8	-1.0681	63.6	65.8	1.03459	76.2	65.6	-1.16159	Mus musculus junction adhesion molecule 4 (Jam4), mRNA.
Lipe	101.4	98.7	96.1	-1.02706	99.6	102.9	1.03313	102.8	88.5	-1.16158
Lcn10	75.6	78.1	75.5	-1.03444	79.8	77.7	-1.02703	88.6	76.3	-1.16121	Mus musculus lipocalin 10 (Lcn10), mRNA.
Adam15	688.6	656.2	658.6	1.00366	602.4	615.7	1.02208	637.5	549	-1.1612	Mus musculus a disintegrin and metallopeptidase domain 15 (metargidin) (Adam15), transcript variant 2, mRNA.
Lnx2	163.5	172.9	166.6	-1.03782	147.4	146.1	-1.0089	179.4	154.5	-1.16117	Mus musculus ligand of numb-protein X 2 (Lnx2), mRNA.
Fbxl14	712.4	682.8	630.1	-1.08364	408.2	445.8	1.09211	522.5	450	-1.16111	Mus musculus F-box and leucine-rich repeat protein 14 (Fbxl14), mRNA.
Grb10	79.2	76.2	73	-1.04384	73	74.1	1.01507	80	68.9	-1.1611
Kcnq3	85.2	86.1	76.1	-1.13141	79.3	94.4	1.19042	82.2	70.8	-1.16102	Mus musculus potassium voltage-gated channel, subfamily Q, member 3 (Kcnq3), mRNA.
Wnt10a	78.8	85.1	77.3	-1.10091	76.3	77.2	1.0118	85.1	73.3	-1.16098	Mus musculus wingless related MMTV integration site 10a (Wnt10a), mRNA.
Rab31	4865.1	4605.1	4724.4	1.02591	3736.8	3819.6	1.02216	3602.8	3103.4	-1.16092	Mus musculus RAB31, member RAS oncogene family (Rab31), mRNA.
Cyp7b1	67	68.9	69.1	1.0029	62.6	62.5	-1.0016	76.5	65.9	-1.16085	Mus musculus cytochrome P450, family 7, subfamily b, polypeptide 1 (Cyp7b1), mRNA.
Lman2l	636.8	622.7	599.4	-1.03887	579.4	565.6	-1.0244	545.7	470.1	-1.16082	Mus musculus lectin, mannose-binding 2-like (Lman2l), mRNA.
Sytl4	69.6	65.2	64.2	-1.01558	69	67.3	-1.02526	65.7	56.6	-1.16078	Mus musculus synaptotagmin-like 4 (Sytl4), mRNA.
Tinf2	70.3	65.5	64.4	-1.01708	66.6	64.1	-1.039	70.8	61	-1.16066	Mus musculus Terf1 (TRF1)-interacting nuclear factor 2 (Tinf2), mRNA.
Olfr33	64.5	65.5	68.6	1.04733	63.5	64.4	1.01417	73.7	63.5	-1.16063	Mus musculus olfactory receptor 33 (Olfr33), mRNA.
Cdc42se1	2684.7	2376.6	2357.6	-1.00806	1910.2	1885.2	-1.01326	2633.7	2269.2	-1.16063	Mus musculus CDC42 small effector 1 (Cdc42se1), transcript variant 1, mRNA.
Cic	139.4	137.8	143.1	1.03846	140.3	136.7	-1.02634	143.8	123.9	-1.16061	Mus musculus capicua homolog (Drosophila) (Cic), mRNA.
Sprr2i	67.3	60.8	64.8	1.06579	68.9	62.3	-1.10594	73	62.9	-1.16057	Mus musculus small proline-rich protein 2I (Sprr2i), mRNA.
Slc25a12	378.5	356.6	369.3	1.03561	341	340	-1.00294	370.8	319.5	-1.16056	Mus musculus solute carrier family 25 (mitochondrial carrier, Aralar), member 12 (Slc25a12), mRNA.
Vav3	231.5	237.8	242.4	1.01934	226.7	239	1.05426	217.6	187.5	-1.16053	Mus musculus vav 3 oncogene (Vav3), transcript variant 1, mRNA.
BC053393	75	69	66.2	-1.0423	74.3	77.3	1.04038	78.1	67.3	-1.16048	Mus musculus cDNA sequence BC053393 (BC053393), mRNA.
Trhr2	70	61.6	71.6	1.16234	69.7	70	1.0043	76.7	66.1	-1.16036	Mus musculus thyrotropin releasing hormone receptor 2 (Trhr2), mRNA.
E330026B02Rik	66.4	60.9	70.3	1.15435	57.7	67.4	1.16811	70.2	60.5	-1.16033	Mus musculus RIKEN cDNA E330026B02 gene (E330026B02Rik), mRNA.
2810003C17Rik	70.3	62.4	71.8	1.15064	66	70.1	1.06212	76	65.5	-1.16031	Mus musculus RIKEN cDNA 2810003C17 gene (2810003C17Rik), mRNA.
Acat3	73.8	72	72.8	1.01111	74.1	75	1.01215	74.6	64.3	-1.16019
Sfrs10	61.9	61.8	54.7	-1.1298	63.1	60.2	-1.04817	67.4	58.1	-1.16007	Mus musculus splicing factor, arginine/serine-rich 10 (transformer 2 homolog, Drosophila) (Sfrs10), mRNA.
Neu3	88.3	85.8	87.7	1.02214	85.4	80.2	-1.06484	96.4	83.1	-1.16005	Mus musculus neuraminidase 3 (Neu3), mRNA.
Olfr1440	63.7	63.4	65.4	1.03155	59.8	63.7	1.06522	66.7	57.5	-1.16	Mus musculus olfactory receptor 1440 (Olfr1440), mRNA.
Cyp1a1	61	63	67.3	1.06825	59.8	70.9	1.18562	75.4	65	-1.16	Mus musculus cytochrome P450, family 1, subfamily a, polypeptide 1 (Cyp1a1), mRNA.
Ephx2	76.1	75.9	78.9	1.03953	79.4	72.6	-1.09366	78.3	67.5	-1.16	Mus musculus epoxide hydrolase 2, cytoplasmic (Ephx2), mRNA.
1810009N02Rik	455.6	495.5	481.1	-1.02993	611.5	671.4	1.09796	720.8	621.4	-1.15996	Mus musculus RIKEN cDNA 1810009N02 gene (1810009N02Rik), mRNA.
Ssbp1	836.4	800.6	787.4	-1.01676	897.7	858.8	-1.0453	940.7	811	-1.15993	Mus musculus single-stranded DNA binding protein 1 (Ssbp1), transcript variant 2, mRNA.
2010109I03Rik	65	64	69.8	1.09062	72.2	59.2	-1.21959	68.2	58.8	-1.15986	Mus musculus RIKEN cDNA 2010109I03 gene (2010109I03Rik), mRNA.
Il20	58.1	57.3	59	1.02967	65.3	62	-1.05323	68.2	58.8	-1.15986	Mus musculus interleukin 20 (Il20), mRNA.
Crh	61.7	54.8	52.6	-1.04183	61.5	56.1	-1.09626	64.6	55.7	-1.15978	Mus musculus corticotropin releasing hormone (Crh), mRNA.
Trp53rk	105.3	94.6	95.3	1.0074	103.9	108.6	1.04524	114.7	98.9	-1.15976	Mus musculus transformation related protein 53 regulating kinase (Trp53rk), mRNA.
2310035C23Rik	89.4	95.8	94.3	-1.01591	88.5	90.8	1.02599	111.8	96.4	-1.15975	Mus musculus RIKEN cDNA 2310035C23 gene (2310035C23Rik), mRNA.
Polr3b	656.2	675	641.5	-1.05222	519.1	619.4	1.19322	591.7	510.2	-1.15974	Mus musculus polymerase (RNA) III (DNA directed) polypeptide B (Polr3b), mRNA.
Pdlim7	458.4	565.8	548	-1.03248	1263.9	1520.2	1.20279	1428.9	1232.2	-1.15963
Exoc4	284.5	271.1	267.1	-1.01498	312.6	329.1	1.05278	296.6	255.8	-1.1595	Mus musculus exocyst complex component 4 (Exoc4), mRNA.
Tnfsf14	72.3	73.1	75.9	1.0383	72	80.2	1.11389	85.8	74	-1.15946	Mus musculus tumor necrosis factor (ligand) superfamily, member 14 (Tnfsf14), mRNA.
Fbxo7	156.5	174.5	166.3	-1.04931	180	146.2	-1.23119	189.1	163.1	-1.15941
Uba1	1154.5	1077.8	1154.5	1.07116	1150.6	1128.5	-1.01958	1445.6	1247	-1.15926	Mus musculus ubiquitin-like modifier activating enzyme 1 (Uba1), mRNA.
LOC100043526	66.7	68.1	65.9	-1.03338	65.1	64.5	-1.0093	69.9	60.3	-1.1592	PREDICTED: Mus musculus similar to DNA directed RNA polymerase II polypeptide A (LOC100043526), mRNA.
Cugbp1	382.9	361.5	355	-1.01831	415.3	404.5	-1.0267	493	425.3	-1.15918	Mus musculus CUG triplet repeat, RNA binding protein 1 (Cugbp1), transcript variant 2, mRNA.
H13	891.9	910.4	915	1.00505	983	972.7	-1.01059	1172.5	1011.5	-1.15917	Mus musculus histocompatibility 13 (H13), mRNA.
Nup54	126.5	118.9	134.5	1.1312	130.3	140.3	1.07675	150.1	129.5	-1.15907	Mus musculus nucleoporin 54 (Nup54), mRNA.
Defb8	64.5	61.1	66.6	1.09002	57	62.5	1.09649	68.5	59.1	-1.15905	Mus musculus defensin beta 8 (Defb8), mRNA.
Rit1	1185.3	1059.3	1043.8	-1.01485	926.1	814.8	-1.1366	1222.6	1054.9	-1.15897	Mus musculus Ras-like without CAAX 1 (Rit1), mRNA.
Slurp1	65.6	70.8	67.6	-1.04734	67.5	61.1	-1.10475	70	60.4	-1.15894	Mus musculus secreted Ly6/Plaur domain containing 1 (Slurp1), mRNA.
Tasp1	182.6	214.3	191.3	-1.12023	202.4	206.9	1.02223	346.4	298.9	-1.15892	Mus musculus taspase, threonine aspartase 1 (Tasp1), mRNA.
Lypd3	72	69.2	68.1	-1.01615	72.9	70.8	-1.02966	78.8	68	-1.15882	Mus musculus Ly6/Plaur domain containing 3 (Lypd3), mRNA.
Ano7	79.9	69.5	72.4	1.04173	88.5	75.7	-1.16909	81	69.9	-1.1588	Mus musculus anoctamin 7 (Ano7), mRNA.
Prdm10	77	83	68	-1.22059	72.1	75.8	1.05132	88.3	76.2	-1.15879	Mus musculus PR domain containing 10 (Prdm10), mRNA.
Trmt11	69.7	58.9	69.9	1.18676	62.1	60.1	-1.03328	68.6	59.2	-1.15878	Mus musculus tRNA methyltransferase 11 homolog (S. cerevisiae) (Trmt11), mRNA.
[truncated: 16,139 more rows]
